# Supplementary material for: A Transcriptionally Distinct CXCL13+CD103+CD8+ T-cell Population Is Associated with B-cell Recruitment and Neoantigen Load in Human Cancer
Source: Oxford University Press journal article supplement (doi:10.1158/2326-6066.cir-18-0517), 2019-03-14
Supplement: 23266066cir180517-sup-206154_2_supp_5384287_pnys14.xlsx [file 23266066cir180517-sup-206154_2_supp_5384287_pnys14.xlsx]

## Sheet: DESeq.minibulk.pilot.txt
Supplementary Table 7. Differential expression analysis of CD103+ vs CD103- CD8+ cytotoxic T cells
Gene	baseMean	log2FoldChange	lfcSE	stat	pvalue	padj
ENSG00000134258.12_VTCN1	17.7736	-24.532	1.92642	-12.7345	3.80124e-37	4.59494e-33
ENSG00000189013.10_KIR2DL4	21.3646	24.2185	2.11164	11.4691	1.88714e-30	1.14059e-26
ENSG00000224902.5_GAGE12H	68.4775	-26.3847	2.81457	-9.37431	6.96324e-21	2.80572e-17
ENSG00000100938.13_GMPR2	8.19758	-23.4911	2.56328	-9.16444	4.98035e-20	1.50506e-16
ENSG00000241465.2_GAGE12I	13.5738	-24.1766	2.92191	-8.27424	1.29276e-16	3.12538e-13
ENSG00000167083.2_GNGT2	4.60925	22.0842	2.92331	7.55449	4.205e-14	8.47168e-11
ENSG00000170442.7_KRT86	28.8963	8.47722	1.27145	6.66735	2.60457e-11	4.49771e-08
ENSG00000046604.8_DSG2	124.079	-7.28655	1.12244	-6.49171	8.48651e-11	1.28231e-07
ENSG00000156234.7_CXCL13	213.613	5.6503	0.915265	6.1734	6.68366e-10	8.9769e-07
ENSG00000120896.9_SORBS3	14.3122	-6.94442	1.14775	-6.05048	1.44416e-09	1.7457e-06
ENSG00000204381.7_LAYN	38.8714	6.42742	1.10055	5.84018	5.2143e-09	5.73004e-06
ENSG00000186891.9_TNFRSF18	34.6876	8.58037	1.48515	5.77745	7.58433e-09	7.63995e-06
ENSG00000116106.7_EPHA4	15.0925	-5.50973	0.957493	-5.75433	8.69853e-09	8.08829e-06
ENSG00000135480.10_KRT7	54.0934	-9.01604	1.65136	-5.45975	4.76805e-08	3.84241e-05
ENSG00000137962.8_ARHGAP29	51.6523	-4.83614	0.885417	-5.46199	4.70834e-08	3.84241e-05
ENSG00000178773.10_CPNE7	9.94759	5.99989	1.1077	5.41655	6.07592e-08	4.48194e-05
ENSG00000065057.3_NTHL1	29.5664	-10.1011	1.86713	-5.40998	6.30319e-08	4.48194e-05
ENSG00000163599.10_CTLA4	88.3114	5.17212	0.966355	5.3522	8.68925e-08	5.83531e-05
ENSG00000127084.13_FGD3	13.8048	4.62749	0.867836	5.33222	9.70214e-08	5.88099e-05
ENSG00000138772.8_ANXA3	20.8217	-4.08083	0.765391	-5.33169	9.73029e-08	5.88099e-05
ENSG00000197321.10_SVIL	11.3776	-5.74979	1.08543	-5.29723	1.17575e-07	6.76787e-05
ENSG00000181847.7_TIGIT	27.2448	6.54453	1.2638	5.17846	2.23725e-07	0.000122927
ENSG00000226979.4_LTA	31.4188	7.99741	1.55165	5.15414	2.54797e-07	0.000133912
ENSG00000123684.8_LPGAT1	7.98513	-3.14478	0.61328	-5.1278	2.93151e-07	0.00014765
ENSG00000076554.11_TPD52	62.0336	-3.84778	0.754495	-5.0998	3.40004e-07	0.000164399
ENSG00000167618.5_LAIR2	19.9536	9.79633	1.93928	5.05153	4.38293e-07	0.000203772
ENSG00000205189.7_ZBTB10	40.7015	-5.69377	1.13413	-5.02041	5.15611e-07	0.000230841
ENSG00000151729.6_SLC25A4	23.0887	-5.79852	1.16525	-4.97619	6.48475e-07	0.000279956
ENSG00000186416.8_NKRF	14.7779	-6.65501	1.35214	-4.92182	8.57417e-07	0.000357395
ENSG00000196735.7_HLA-DQA1	94.7736	3.71693	0.756911	4.91066	9.07712e-07	0.000365748
ENSG00000236481.1_AC002331.1	18.5111	7.22474	1.4733	4.90379	9.40061e-07	0.000366563
ENSG00000143429.5_AC027612.6	24.9457	-6.90754	1.41496	-4.8818	1.05121e-06	0.000366997
ENSG00000099290.11_FAM21A	16.4767	-7.43792	1.52168	-4.88797	1.01883e-06	0.000366997
ENSG00000120875.4_DUSP4	424.218	1.84437	0.377828	4.88151	1.05277e-06	0.000366997
ENSG00000082438.11_COBLL1	21.7005	-4.06829	0.833722	-4.87967	1.06262e-06	0.000366997
ENSG00000168137.11_SETD5	20.4791	-3.11313	0.641119	-4.85578	1.19914e-06	0.000396656
ENSG00000083457.7_ITGAE	108.032	3.03366	0.625069	4.85332	1.21412e-06	0.000396656
ENSG00000163001.7_CCDC104	16.5454	-4.03122	0.837853	-4.81137	1.49898e-06	0.000476833
ENSG00000181929.7_PRKAG1	28.1948	-3.01652	0.636729	-4.73753	2.16336e-06	0.000670529
ENSG00000100450.8_GZMH	429.542	3.03278	0.644889	4.7028	2.56617e-06	0.000771185
ENSG00000239713.3_APOBEC3G	274.38	2.62582	0.558817	4.6989	2.6157e-06	0.000771185
ENSG00000057935.9_MTA3	44.1272	-2.6351	0.563304	-4.67793	2.89789e-06	0.000834042
ENSG00000175866.11_BAIAP2	13.0519	-5.98514	1.28492	-4.65797	3.19348e-06	0.000897738
ENSG00000196693.10_ZNF33B	6.15748	-3.67546	0.793814	-4.63013	3.6543e-06	0.000960286
ENSG00000132600.12_PRMT7	12.3958	7.10315	1.53178	4.6372	3.53167e-06	0.000960286
ENSG00000149231.7_CCDC82	9.89499	5.40044	1.1654	4.63397	3.58727e-06	0.000960286
ENSG00000152969.12_JAKMIP1	20.8312	5.60845	1.22302	4.58575	4.52356e-06	0.00116342
ENSG00000137474.15_MYO7A	39.4496	4.42395	0.966234	4.57855	4.68218e-06	0.00117913
ENSG00000163435.11_ELF3	96.1756	-3.7804	0.828481	-4.56305	5.04148e-06	0.0012437
ENSG00000171476.17_HOPX	94.3914	2.34098	0.515745	4.53902	5.65176e-06	0.00136637
ENSG00000143641.8_GALNT2	82.6634	4.20386	0.933866	4.50156	6.74552e-06	0.00159882
ENSG00000166394.10_CYB5R2	6.74702	-3.7368	0.831531	-4.49388	6.99377e-06	0.00162578
ENSG00000136861.13_CDK5RAP2	8.96796	-4.58007	1.0286	-4.45271	8.47936e-06	0.00193393
ENSG00000139372.10_TDG	8.49951	-5.63257	1.27149	-4.42991	9.42727e-06	0.00196477
ENSG00000138606.15_SHF	8.24739	-4.23679	0.955477	-4.43421	9.24094e-06	0.00196477
ENSG00000179918.15_SEPHS2	13.5447	-9.37914	2.11448	-4.43567	9.17856e-06	0.00196477
ENSG00000116213.11_WRAP73	15.2935	-3.93449	0.887654	-4.43246	9.31623e-06	0.00196477
ENSG00000158109.10_TPRG1L	22.1715	-6.16798	1.38873	-4.44144	8.93577e-06	0.00196477
ENSG00000145390.7_USP53	13.6051	-2.41951	0.54711	-4.42234	9.76376e-06	0.00197063
ENSG00000141682.11_PMAIP1	930.392	1.62105	0.366593	4.42195	9.78142e-06	0.00197063
ENSG00000136068.10_FLNB	8.61249	-5.52203	1.25508	-4.39973	1.08386e-05	0.00214782
ENSG00000103540.12_CCP110	12.3023	-3.50785	0.798364	-4.39379	1.11389e-05	0.00217173
ENSG00000151348.9_EXT2	5.51412	-4.86444	1.11233	-4.37321	1.22433e-05	0.00231246
ENSG00000168685.10_IL7R	34.1513	-2.09715	0.479272	-4.3757	1.21044e-05	0.00231246
ENSG00000103485.13_QPRT	49.4827	-2.05342	0.470073	-4.36831	1.25212e-05	0.00232856
ENSG00000237298.4_TTN-AS1	19.5686	4.96768	1.14106	4.35357	1.33937e-05	0.00245307
ENSG00000039068.14_CDH1	26.1711	-3.24236	0.746971	-4.34068	1.42042e-05	0.00256269
ENSG00000211785.1_TRAV12-1	25.7597	5.75732	1.33484	4.3131	1.60978e-05	0.00286162
ENSG00000173801.12_JUP	17.3267	-7.21189	1.68384	-4.28301	1.84383e-05	0.00323017
ENSG00000214548.10_MEG3	12.4581	-3.04826	0.712985	-4.27535	1.90841e-05	0.00329554
ENSG00000082512.10_TRAF5	41.7726	3.69297	0.872323	4.23349	2.30091e-05	0.00391739
ENSG00000170421.7_KRT8	105.138	-3.61491	0.856864	-4.21877	2.4564e-05	0.00411434
ENSG00000197822.6_OCLN	36.6133	-2.74432	0.650901	-4.21619	2.48467e-05	0.00411434
ENSG00000007312.8_CD79B	9.75104	8.94575	2.12552	4.20873	2.56806e-05	0.00419497
ENSG00000100413.12_POLR3H	18.0716	-4.97053	1.18268	-4.20277	2.63664e-05	0.00424955
ENSG00000111319.8_SCNN1A	67.6472	-2.19086	0.52239	-4.19391	2.74187e-05	0.00436101
ENSG00000100453.8_GZMB	2108.46	3.02127	0.724136	4.17224	3.01615e-05	0.00467427
ENSG00000124767.6_GLO1	23.4666	-5.02816	1.20481	-4.1734	3.0009e-05	0.00467427
ENSG00000129355.6_CDKN2D	26.2346	-6.28194	1.50718	-4.16802	3.07259e-05	0.00470145
ENSG00000091136.9_LAMB1	15.8503	-7.38315	1.77727	-4.15421	3.2642e-05	0.00493221
ENSG00000162616.8_DNAJB4	6.93039	-5.73993	1.3853	-4.14344	3.4213e-05	0.00505077
ENSG00000135077.4_HAVCR2	74.5009	2.55156	0.615953	4.14246	3.43606e-05	0.00505077
ENSG00000170627.5_GTSF1	22.5636	-5.5169	1.33248	-4.14033	3.46802e-05	0.00505077
ENSG00000131269.11_ABCB7	9.03877	-6.56976	1.59026	-4.13125	3.60798e-05	0.00513097
ENSG00000127946.12_HIP1	28.5936	2.63747	0.638399	4.13138	3.60593e-05	0.00513097
ENSG00000205560.8_CPT1B	8.06047	6.47215	1.56935	4.12409	3.72196e-05	0.0052004
ENSG00000272282.1_RP11-222K16.2	18.4699	8.15114	1.97709	4.12281	3.74284e-05	0.0052004
ENSG00000124098.9_FAM210B	9.09528	-3.26566	0.792695	-4.1197	3.79373e-05	0.0052112
ENSG00000110066.10_SUV420H1	34.1178	-3.75957	0.915439	-4.10685	4.01094e-05	0.00541963
ENSG00000119950.16_MXI1	9.29887	-6.46085	1.5747	-4.1029	4.07997e-05	0.00541963
ENSG00000251022.2_THAP9-AS1	24.1992	-3.3767	0.822598	-4.10493	4.0444e-05	0.00541963
ENSG00000119778.10_ATAD2B	17.4777	2.57496	0.629864	4.08812	4.34889e-05	0.00571406
ENSG00000255949.1_AP003419.16	16.8201	4.9835	1.22372	4.07242	4.65268e-05	0.00598315
ENSG00000197912.9_SPG7	27.8434	2.19329	0.538476	4.07314	4.63835e-05	0.00598315
ENSG00000105486.9_LIG1	17.357	5.31691	1.31298	4.0495	5.13281e-05	0.00653109
ENSG00000267575.2_CTC-459F4.3	6.89646	-5.37465	1.32974	-4.04188	5.30247e-05	0.0066767
ENSG00000109654.10_TRIM2	2.89093	-3.7044	0.91778	-4.03626	5.43107e-05	0.00676813
ENSG00000130816.10_DNMT1	131.596	2.1764	0.542747	4.00997	6.07271e-05	0.0074905
ENSG00000089692.4_LAG3	320.807	3.05837	0.763193	4.00734	6.14076e-05	0.00749793
ENSG00000164904.11_ALDH7A1	7.02137	-3.74754	0.940862	-3.98309	6.80259e-05	0.00814155
ENSG00000232527.3_RP11-14N7.2	10.4656	-5.02414	1.2613	-3.98331	6.79626e-05	0.00814155
ENSG00000152939.10_MARVELD2	37.5867	-2.2302	0.560697	-3.97755	6.96285e-05	0.00825166
ENSG00000156127.6_BATF	59.8949	3.954	0.995899	3.97029	7.17862e-05	0.00834376
ENSG00000150768.11_DLAT	5.15414	-4.74714	1.19529	-3.97153	7.14123e-05	0.00834376
ENSG00000143379.8_SETDB1	17.6004	-3.46749	0.881682	-3.93282	8.39557e-05	0.00966531
ENSG00000168038.6_ULK4	15.3611	-7.36466	1.87591	-3.92592	8.63993e-05	0.00985278
ENSG00000164347.13_GFM2	4.50706	-3.17318	0.81035	-3.91581	9.01013e-05	0.0101789
ENSG00000044459.10_CNTLN	3.96177	-2.87469	0.735335	-3.90935	9.25432e-05	0.010285
ENSG00000173272.9_MZT2A	119.309	1.95593	0.500387	3.90884	9.27418e-05	0.010285
ENSG00000100162.10_CENPM	13.8119	9.19388	2.35732	3.90014	9.61375e-05	0.0104695
ENSG00000172543.3_CTSW	53.5647	1.86494	0.478142	3.90039	9.60375e-05	0.0104695
ENSG00000256683.2_ZNF350	55.5028	-2.75994	0.710225	-3.88601	0.000101905	0.0109033
ENSG00000175352.6_NRIP3	36.2248	-2.43554	0.626755	-3.88596	0.000101925	0.0109033
ENSG00000115884.6_SDC1	15.1551	-9.40651	2.43749	-3.8591	0.000113806	0.0120674
ENSG00000005206.12_SPPL2B	3.72065	-3.84629	0.997721	-3.85508	0.000115694	0.0121609
ENSG00000182463.11_TSHZ2	15.4539	3.08665	0.803929	3.83945	0.000123309	0.0128496
ENSG00000057019.11_DCBLD2	3.39914	-3.86632	1.00836	-3.83425	0.000125948	0.0129022
ENSG00000198858.5_R3HDM4	37.1064	-4.59999	1.19912	-3.83614	0.000124983	0.0129022
ENSG00000006468.9_ETV1	17.5862	7.09272	1.85304	3.8276	0.000129397	0.0131441
ENSG00000124243.13_BCAS4	12.6628	3.29034	0.860501	3.82375	0.000131436	0.01324
ENSG00000111796.3_KLRB1	58.6133	5.59358	1.47008	3.80495	0.000141835	0.0141694
ENSG00000081692.8_JMJD4	32.834	4.46507	1.17751	3.79196	0.000149465	0.0148093
ENSG00000147133.11_TAF1	8.14495	-2.39237	0.632026	-3.78524	0.00015356	0.0149696
ENSG00000129657.10_SEC14L1	215.919	1.87326	0.494862	3.78542	0.000153447	0.0149696
ENSG00000240303.3_ACAD11	5.46313	-4.21059	1.11324	-3.78227	0.000155408	0.0150285
ENSG00000006075.11_CCL3	1171.78	2.57824	0.682338	3.77854	0.000157749	0.0151339
ENSG00000177469.12_PTRF	8.34406	-2.8273	0.748795	-3.7758	0.000159493	0.0151476
ENSG00000167034.9_NKX3-1	14.5774	-6.4894	1.71932	-3.77439	0.000160399	0.0151476
ENSG00000147883.9_CDKN2B	17.0289	-7.60815	2.01836	-3.76946	0.0001636	0.0152058
ENSG00000244242.1_IFITM10	31.7956	4.78845	1.27094	3.76766	0.000164788	0.0152058
ENSG00000100299.13_ARSA	8.55382	4.52788	1.2008	3.77071	0.000162783	0.0152058
ENSG00000148450.8_MSRB2	6.77536	-5.86156	1.56104	-3.75491	0.000173402	0.01576
ENSG00000072134.11_EPN2	13.9455	-2.72571	0.725572	-3.75664	0.00017221	0.01576
ENSG00000065559.10_MAP2K4	4.53343	-3.71801	0.99293	-3.74448	0.000180766	0.0163067
ENSG00000023909.5_GCLM	25.4256	-2.3111	0.618913	-3.73413	0.000188366	0.0168664
ENSG00000176824.2_AC009951.1	9.20366	3.6583	0.98083	3.7298	0.00019163	0.0170325
ENSG00000163788.9_SNRK	20.256	-3.43314	0.923756	-3.71649	0.000202006	0.0178237
ENSG00000147168.8_IL2RG	115.684	1.99704	0.537702	3.71403	0.000203984	0.0178678
ENSG00000107829.9_FBXW4	24.2553	-2.96495	0.800881	-3.70212	0.00021381	0.0185937
ENSG00000161570.4_CCL5	10372.1	1.56596	0.423301	3.69941	0.000216105	0.0186591
ENSG00000163904.8_SENP2	33.3132	-2.31153	0.626456	-3.68985	0.00022439	0.0192371
ENSG00000100068.7_LRP5L	9.21605	-6.74817	1.83563	-3.67622	0.000236715	0.0197339
ENSG00000225756.1_DBH-AS1	12.5367	7.10577	1.93276	3.67648	0.000236471	0.0197339
ENSG00000213047.7_DENND1B	18.8887	3.87549	1.05282	3.68105	0.000232278	0.0197339
ENSG00000132965.5_ALOX5AP	539.595	1.8841	0.512321	3.67757	0.000235463	0.0197339
ENSG00000140836.10_ZFHX3	6.83548	5.51984	1.50395	3.67023	0.000242328	0.0200634
ENSG00000127980.11_PEX1	10.7818	-1.75825	0.479378	-3.66776	0.00024468	0.0201204
ENSG00000196268.7_ZNF493	56.6625	-2.67259	0.729101	-3.6656	0.000246761	0.0201544
ENSG00000123338.8_NCKAP1L	23.1575	2.42211	0.661278	3.66278	0.000249493	0.0202407
ENSG00000167912.5_RP11-25K19.1	20.5394	6.93312	1.89512	3.65841	0.000253783	0.0203161
ENSG00000237765.2_FAM200B	8.1517	-4.50904	1.23207	-3.65971	0.000252499	0.0203161
ENSG00000204219.5_TCEA3	22.4998	-7.04158	1.92773	-3.65278	0.000259415	0.0204955
ENSG00000100234.11_TIMP3	10.0452	-6.87173	1.88096	-3.65331	0.000258876	0.0204955
ENSG00000168298.4_HIST1H1E	10.2833	-5.09445	1.39825	-3.64346	0.000269002	0.0211149
ENSG00000259924.1_RP11-16E23.4	7.89828	-4.52991	1.24818	-3.62922	0.000284283	0.021888
ENSG00000267251.1_AC139100.3	4.84595	5.23512	1.44187	3.6308	0.000282546	0.021888
ENSG00000142609.13_C1orf222	21.9424	-1.24049	0.341685	-3.63051	0.000282859	0.021888
ENSG00000004766.11_CCDC132	8.48848	-3.34792	0.923057	-3.62699	0.000286743	0.0219376
ENSG00000164104.7_HMGB2	153.404	2.08096	0.574818	3.62021	0.000294369	0.0223251
ENSG00000185621.7_LMLN	8.92463	-3.28379	0.908978	-3.61261	0.000303125	0.0223251
ENSG00000143669.9_LYST	49.4893	3.36635	0.932345	3.61062	0.000305462	0.0223251
ENSG00000121671.7_CRY2	12.4921	-2.88306	0.797235	-3.61632	0.000298817	0.0223251
ENSG00000197343.6_ZNF655	90.8657	1.89953	0.526234	3.60967	0.000306583	0.0223251
ENSG00000102796.6_DHRS12	9.47158	6.01045	1.6646	3.61075	0.000305307	0.0223251
ENSG00000109787.8_KLF3	61.0713	-2.26426	0.627187	-3.61018	0.000305989	0.0223251
ENSG00000163755.4_HPS3	6.95802	-4.55531	1.25923	-3.61755	0.000297411	0.0223251
ENSG00000224298.2_AC069363.1	17.765	3.04456	0.843918	3.60765	0.00030898	0.022365
ENSG00000145916.14_RMND5B	7.39057	-3.06934	0.851376	-3.60515	0.000311977	0.0224475
ENSG00000234883.2_MIR155HG	39.6346	5.3457	1.48358	3.60324	0.000314274	0.022479
ENSG00000180644.6_PRF1	153.714	3.82902	1.06458	3.59673	0.000322239	0.0229131
ENSG00000124523.10_SIRT5	14.9827	-3.41354	0.95048	-3.59139	0.000328919	0.0231161
ENSG00000119139.12_TJP2	5.07233	-5.4236	1.5098	-3.59225	0.000327833	0.0231161
ENSG00000130766.4_SESN2	6.16976	-5.18817	1.45317	-3.57025	0.00035664	0.0247762
ENSG00000188921.12_PTPLAD2	24.0322	2.80119	0.784378	3.57123	0.000355313	0.0247762
ENSG00000187990.4_HIST1H2BG	28.0586	-6.56352	1.84166	-3.56391	0.000365365	0.0250939
ENSG00000204420.4_C6orf25	3.0797	-3.06507	0.860014	-3.56397	0.000365281	0.0250939
ENSG00000149100.8_EIF3M	150.927	-1.49238	0.419086	-3.56103	0.000369401	0.0252278
ENSG00000157837.11_SPPL3	36.3892	-2.17279	0.611451	-3.55349	0.000380154	0.0254299
ENSG00000158525.11_CPA5	28.5698	6.54266	1.83971	3.55635	0.000376046	0.0254299
ENSG00000106066.9_CPVL	16.2122	-5.02257	1.41359	-3.55306	0.000380775	0.0254299
ENSG00000147471.7_PROSC	13.8192	3.48343	0.979705	3.55559	0.000377127	0.0254299
ENSG00000071889.12_FAM3A	10.9455	-2.16	0.608279	-3.551	0.000383776	0.0254895
ENSG00000138696.6_BMPR1B	8.33383	-5.8242	1.6523	-3.52489	0.000423651	0.0279841
ENSG00000163527.5_STT3B	94.268	1.90397	0.541697	3.51483	0.000440042	0.0287526
ENSG00000173905.4_GOLIM4	763.909	2.28816	0.650943	3.51514	0.000439516	0.0287526
ENSG00000132313.10_MRPL35	4.57929	-5.24723	1.49422	-3.51169	0.000445263	0.0289373
ENSG00000257923.5_CUX1	3.46355	-5.1914	1.48279	-3.5011	0.00046334	0.02902
ENSG00000162066.10_AMDHD2	5.90911	7.89459	2.25483	3.50119	0.00046318	0.02902
ENSG00000107371.8_EXOSC3	21.4366	-2.91275	0.831915	-3.50126	0.000463063	0.02902
ENSG00000168542.8_COL3A1	13.0226	-6.78663	1.93527	-3.5068	0.000453526	0.02902
ENSG00000085449.10_WDFY1	38.3178	-2.83874	0.810491	-3.5025	0.000460921	0.02902
ENSG00000136521.8_NDUFB5	34.1199	-3.09242	0.882708	-3.50333	0.000459484	0.02902
ENSG00000008394.8_MGST1	14.6386	-3.94612	1.12664	-3.50255	0.000460824	0.02902
ENSG00000010270.9_STARD3NL	34.9646	3.04223	0.869705	3.498	0.000468753	0.0292076
ENSG00000133142.13_TCEAL4	55.0194	-4.58576	1.31169	-3.49608	0.000472148	0.0292683
ENSG00000118137.5_APOA1	26.6331	-6.68443	1.91468	-3.49115	0.000480945	0.0294537
ENSG00000115738.5_ID2	606.394	1.35793	0.389057	3.49032	0.000482448	0.0294537
ENSG00000153339.9_TRAPPC8	23.1122	-3.20297	0.917264	-3.49187	0.000479645	0.0294537
ENSG00000090104.7_RGS1	787.812	1.15696	0.331925	3.48559	0.000491055	0.0298285
ENSG00000235560.3_AC002310.12	3.02171	2.72488	0.784683	3.47259	0.000515467	0.0303584
ENSG00000148346.7_LCN2	15.8295	-6.26011	1.79934	-3.47912	0.00050306	0.0303584
ENSG00000166947.7_EPB42	7.385	3.30037	0.950676	3.4716	0.000517358	0.0303584
ENSG00000204217.8_BMPR2	13.9961	-2.94565	0.848044	-3.47346	0.000513787	0.0303584
ENSG00000071054.11_MAP4K4	23.0819	-3.20212	0.921942	-3.47323	0.000514225	0.0303584
ENSG00000132423.6_COQ3	2.83925	-3.66339	1.05366	-3.47681	0.000507416	0.0303584
ENSG00000110446.5_SLC15A3	6.91759	-5.70486	1.64119	-3.47605	0.000508862	0.0303584
ENSG00000152219.4_ARL14EP	25.6392	-4.65431	1.34167	-3.46904	0.00052233	0.030502
ENSG00000197932.3_F8A1	17.1983	-6.11989	1.7704	-3.45679	0.000546644	0.0317684
ENSG00000128833.8_MYO5C	7.48896	-3.4285	0.994469	-3.44757	0.000565663	0.0327165
ENSG00000168404.8_MLKL	15.873	-2.18962	0.635456	-3.44574	0.000569498	0.0327814
ENSG00000167608.7_TMC4	24.4638	-2.79911	0.812777	-3.44389	0.000573409	0.0328501
ENSG00000189143.8_CLDN4	133.539	-3.50303	1.01794	-3.44129	0.000578945	0.0330108
ENSG00000163898.5_LIPH	17.8446	-2.13972	0.62288	-3.4352	0.000592112	0.0331363
ENSG00000129455.11_KLK8	31.6596	-5.18684	1.50953	-3.43606	0.000590245	0.0331363
ENSG00000171603.12_CLSTN1	9.8441	-3.82561	1.11272	-3.43806	0.000585903	0.0331363
ENSG00000187741.10_FANCA	15.626	-3.70492	1.07782	-3.43743	0.000587269	0.0331363
ENSG00000168216.6_LMBRD1	34.8399	3.59922	1.04845	3.43289	0.000597186	0.0332415
ENSG00000102575.6_ACP5	7.85118	3.01753	0.879767	3.42992	0.000603758	0.0332415
ENSG00000168214.16_RBPJ	207.658	1.65014	0.481231	3.42899	0.00060583	0.0332415
ENSG00000107890.12_ANKRD26	8.23867	-6.13659	1.79007	-3.42814	0.00060774	0.0332415
ENSG00000105374.5_NKG7	149.917	1.85845	0.541964	3.42911	0.000605556	0.0332415
ENSG00000175216.10_CKAP5	5.11724	-5.11366	1.4945	-3.42165	0.000622431	0.0338917
ENSG00000204172.7_AGAP10	3.80645	-3.616	1.0574	-3.41971	0.00062688	0.0339809
ENSG00000259001.2_RPPH1	6.41865	-5.27151	1.54424	-3.41366	0.000640973	0.0344612
ENSG00000135164.14_DMTF1	18.7072	2.83467	0.83044	3.41346	0.000641443	0.0344612
ENSG00000148429.10_USP6NL	31.4484	-2.10056	0.615922	-3.41043	0.000648603	0.0346916
ENSG00000161048.7_NAPEPLD	2.5323	-3.27516	0.961385	-3.40671	0.000657503	0.0350128
ENSG00000236989.1_AC142119.1	10.4847	-2.11937	0.623821	-3.3974	0.000680285	0.036067
ENSG00000141524.11_TMC6	107.134	1.87327	0.55211	3.39293	0.000691485	0.0365007
ENSG00000131747.10_TOP2A	7.95923	6.28427	1.85841	3.38153	0.000720827	0.0378841
ENSG00000111885.5_MAN1A1	6.56161	6.1714	1.82811	3.37585	0.000735889	0.0385083
ENSG00000075618.13_FSCN1	15.091	-4.26873	1.26591	-3.37206	0.000746076	0.0388731
ENSG00000160194.13_NDUFV3	112.961	-1.34857	0.400337	-3.36859	0.000755546	0.0390301
ENSG00000118849.5_RARRES1	11.6838	-6.63715	1.97001	-3.36909	0.00075416	0.0390301
ENSG00000235944.3_ZNF815P	4.99524	-3.47554	1.03279	-3.36519	0.000764918	0.0393461
ENSG00000115350.7_POLE4	58.2734	-4.82962	1.43632	-3.36249	0.000772427	0.039564
ENSG00000180914.6_OXTR	4.05976	-5.56923	1.65936	-3.35624	0.000790097	0.0397946
ENSG00000076351.8_SLC46A1	3.89022	-2.56844	0.764767	-3.35847	0.000783762	0.0397946
ENSG00000243725.2_TTC4	4.73106	-5.78815	1.72295	-3.35945	0.000780983	0.0397946
ENSG00000205542.6_TMSB4X	4714.53	0.6686	0.199164	3.35703	0.000787838	0.0397946
ENSG00000213949.4_ITGA1	68.836	2.22225	0.662529	3.35419	0.00079597	0.0399092
ENSG00000034693.10_PEX3	23.6427	-4.7999	1.43146	-3.35315	0.000798976	0.0399092
ENSG00000238142.1_RP11-108M9.4	6.11105	-6.00524	1.79175	-3.35161	0.000803426	0.0399663
ENSG00000188647.8_PTAR1	22.6897	3.33975	0.997915	3.34672	0.000817723	0.0405108
ENSG00000142546.9_NOSIP	85.7737	-3.10027	0.926975	-3.3445	0.000824306	0.0406703
ENSG00000171345.9_KRT19	389.341	-4.10793	1.2296	-3.34088	0.00083514	0.0408711
ENSG00000164975.11_SNAPC3	6.12212	-3.05546	0.914472	-3.34123	0.000834094	0.0408711
ENSG00000068654.11_POLR1A	47.7544	-2.16509	0.649049	-3.33578	0.000850598	0.0414598
ENSG00000105974.7_CAV1	10.3327	-7.85154	2.35582	-3.33283	0.000859669	0.0417336
ENSG00000170832.8_USP32	5.97068	5.36098	1.61098	3.32777	0.000875435	0.0420995
ENSG00000155066.11_PROM2	13.8698	-2.24185	0.673823	-3.32707	0.000877653	0.0420995
ENSG00000178927.12_C17orf62	58.0018	3.24679	0.975523	3.32826	0.000873911	0.0420995
ENSG00000017483.10_SLC38A5	5.59803	5.93026	1.78433	3.32351	0.000888913	0.0424711
ENSG00000138443.11_ABI2	43.4557	-1.57471	0.475507	-3.31165	0.000927486	0.0431802
ENSG00000101457.8_DNTTIP1	5.89865	-6.10412	1.84236	-3.31321	0.00092233	0.0431802
ENSG00000105855.5_ITGB8	57.2656	-2.00972	0.606476	-3.31378	0.000920454	0.0431802
ENSG00000205336.7_GPR56	38.039	2.17812	0.65779	3.31126	0.00092876	0.0431802
ENSG00000122188.8_LAX1	3.51119	-3.08743	0.931517	-3.31441	0.000918369	0.0431802
ENSG00000116793.11_PHTF1	22.347	2.70609	0.816718	3.31337	0.000921801	0.0431802
ENSG00000173442.7_EHBP1L1	8.34799	3.89303	1.17464	3.31424	0.000918913	0.0431802
ENSG00000120137.6_PANK3	5.16794	-1.85456	0.561373	-3.30362	0.00095446	0.0434631
ENSG00000186918.9_ZNF395	30.6156	-3.79465	1.14731	-3.30743	0.000941551	0.0434631
ENSG00000133243.4_BTBD2	4.49863	-2.62292	0.793416	-3.30586	0.000946857	0.0434631
ENSG00000150316.7_CWC15	230.199	0.861115	0.260585	3.30455	0.000951293	0.0434631
ENSG00000197279.3_ZNF165	9.46592	-4.37464	1.32316	-3.3062	0.000945717	0.0434631
ENSG00000221926.7_TRIM16	11.381	-2.74367	0.83065	-3.30304	0.000956419	0.0434631
ENSG00000167604.9_NFKBID	5.03203	2.16177	0.654751	3.30167	0.000961119	0.0435131
ENSG00000100401.15_RANGAP1	9.28425	-2.22409	0.673901	-3.30032	0.000965735	0.043559
ENSG00000005156.7_LIG3	6.7476	-3.28612	0.997795	-3.29338	0.0009899	0.044483
ENSG00000189180.11_ZNF33A	6.18645	-2.79446	0.849346	-3.29014	0.00100139	0.0445029
ENSG00000132466.13_ANKRD17	4.03687	-5.23494	1.59031	-3.29178	0.000995569	0.0445029
ENSG00000170632.9_ARMC10	34.3258	-2.22489	0.676172	-3.29041	0.0010004	0.0445029
ENSG00000065361.10_ERBB3	20.5692	-2.60047	0.791376	-3.28601	0.00101618	0.0448892
ENSG00000184602.5_SNN	11.9744	-6.00313	1.82708	-3.28564	0.00101751	0.0448892
ENSG00000171566.7_PLRG1	19.8467	-4.14057	1.26378	-3.27634	0.00105161	0.0462251
ENSG00000169129.10_AFAP1L2	36.5768	4.19571	1.28177	3.27337	0.00106274	0.0465449
ENSG00000051523.6_CYBA	386.809	1.25707	0.384165	3.27221	0.00106712	0.046568
ENSG00000110324.5_IL10RA	77.2802	2.51771	0.770757	3.26655	0.00108868	0.047338
ENSG00000252690.2_SCARNA15	5.39334	2.43019	0.745249	3.26091	0.00111057	0.0481168
ENSG00000152082.9_MZT2B	170.896	2.49259	0.765719	3.25523	0.001133	0.0485663
ENSG00000197894.6_ADH5	7.28995	-3.27178	1.00507	-3.25527	0.00113284	0.0485663
ENSG00000060138.8_YBX3	164.551	-1.66988	0.512941	-3.2555	0.00113194	0.0485663
ENSG00000105647.10_PIK3R2	7.37077	-2.64848	0.814516	-3.2516	0.00114757	0.0490169
ENSG00000147586.5_MRPS28	12.8034	-2.23997	0.689705	-3.24772	0.00116332	0.0495148
ENSG00000158062.16_UBXN11	150.147	1.23702	0.381052	3.24632	0.00116907	0.049585
ENSG00000272379.1_RP1-257A7.5	18.4417	-5.25813	1.621	-3.24375	0.00117967	0.0498598
ENSG00000156873.11_PHKG2	40.7826	1.53955	0.475419	3.23829	0.00120247	0.0506462
ENSG00000120860.6_CCDC53	46.7077	3.43614	1.06195	3.23571	0.00121342	0.0509298
ENSG00000167863.7_ATP5H	60.9	1.73181	0.535744	3.23253	0.00122697	0.0513205
ENSG00000269636.1_AC010441.1	10.9479	-5.15635	1.598	-3.22675	0.00125204	0.0518311
ENSG00000164056.6_SPRY1	176.412	2.93447	0.909364	3.22695	0.00125117	0.0518311
ENSG00000167721.6_TSR1	18.2628	-1.94558	0.60277	-3.22773	0.00124777	0.0518311
ENSG00000116039.7_ATP6V1B1	9.69101	-5.16324	1.60097	-3.22508	0.00125938	0.051957
ENSG00000271816.1_RP11-574K11.28	11.0025	-1.95438	0.606537	-3.22219	0.00127217	0.052285
ENSG00000204620.2_AC115618.1	4.4016	-1.78008	0.552593	-3.22133	0.00127598	0.052285
ENSG00000077232.12_DNAJC10	55.0804	-1.77495	0.551646	-3.21756	0.00129287	0.052798
ENSG00000171865.5_RNASEH1	15.8521	-2.51604	0.784241	-3.20825	0.00133547	0.0543541
ENSG00000121316.6_PLBD1	9.79433	-3.32428	1.03698	-3.20574	0.00134714	0.0546078
ENSG00000204568.7_MRPS18B	35.4249	-1.78697	0.557561	-3.20498	0.00135074	0.0546078
ENSG00000110429.9_FBXO3	4.37214	4.75284	1.48397	3.2028	0.001361	0.0548394
ENSG00000154889.12_MPPE1	34.0797	-1.58723	0.495861	-3.20095	0.00136975	0.0550084
ENSG00000101236.12_RNF24	33.5425	-3.28331	1.0286	-3.19201	0.00141286	0.0563652
ENSG00000186314.7_PRELID2	22.1336	-1.65568	0.51854	-3.19296	0.00140822	0.0563652
ENSG00000260077.1_RP11-254F7.2	4.63443	-2.63949	0.827468	-3.18984	0.0014235	0.056603
ENSG00000160255.12_ITGB2	276.273	1.83656	0.576173	3.18751	0.00143505	0.056875
ENSG00000196998.11_WDR45	45.8894	-2.52039	0.79203	-3.18218	0.00146169	0.0569963
ENSG00000123505.10_AMD1	69.2246	2.24462	0.704987	3.18392	0.00145295	0.0569963
ENSG00000106799.8_TGFBR1	6.08339	-4.31386	1.35551	-3.18247	0.00146023	0.0569963
ENSG00000130764.5_LRRC47	20.1009	-2.34049	0.73501	-3.18429	0.00145107	0.0569963
ENSG00000077809.8_GTF2I	144.605	-1.64191	0.515594	-3.1845	0.00145003	0.0569963
ENSG00000101608.8_MYL12A	478.992	1.01691	0.31968	3.18103	0.00146753	0.05704
ENSG00000088899.10_LZTS3	4.17391	-5.27691	1.66058	-3.17775	0.0014842	0.0571371
ENSG00000151287.12_TEX30	21.0899	6.13219	1.92938	3.17832	0.00148132	0.0571371
ENSG00000061936.5_SFSWAP	19.8755	-2.82739	0.88941	-3.17895	0.0014781	0.0571371
ENSG00000198373.8_WWP2	6.10107	-2.81716	0.887158	-3.17549	0.00149585	0.0574028
ENSG00000187653.10_TMSB4XP8	155.328	0.70444	0.222073	3.1721	0.00151339	0.057892
ENSG00000005844.13_ITGAL	65.3384	1.79732	0.566913	3.17036	0.00152249	0.0580565
ENSG00000169718.13_DUS1L	11.6026	-4.62029	1.45938	-3.16593	0.00154587	0.0585783
ENSG00000166317.7_SYNPO2L	4.63129	2.79163	0.881566	3.16668	0.00154191	0.0585783
ENSG00000102595.14_UGGT2	10.4447	-2.4035	0.759734	-3.1636	0.00155831	0.0588651
ENSG00000228395.1_RP11-216B9.6	5.15888	-2.34808	0.744514	-3.15384	0.00161139	0.0606805
ENSG00000166024.9_R3HCC1L	3.03869	-4.65909	1.48114	-3.14562	0.00165735	0.0622176
ENSG00000065882.11_TBC1D1	22.3607	3.41878	1.08763	3.14333	0.00167037	0.0625121
ENSG00000183778.13_B3GALT5	6.98533	2.22406	0.70837	3.13968	0.00169133	0.0631012
ENSG00000162174.8_ASRGL1	25.6597	-2.17358	0.692691	-3.13788	0.00170175	0.0632945
ENSG00000228203.2_RNF144A-AS1	25.6891	-1.05397	0.336701	-3.13028	0.0017464	0.0646131
ENSG00000100038.15_TOP3B	4.49893	5.62299	1.79647	3.13003	0.00174789	0.0646131
ENSG00000047634.10_SCML1	6.71143	-6.28975	2.01322	-3.12422	0.00178276	0.0657012
ENSG00000132603.9_NIP7	14.9325	-2.96193	0.948426	-3.12299	0.00179023	0.0657759
ENSG00000180385.4_AC034193.5	14.3085	-2.05873	0.659759	-3.12043	0.00180587	0.0661497
ENSG00000239521.3_GATS	2.56062	-2.14099	0.687302	-3.11506	0.00183905	0.0671614
ENSG00000108559.7_NUP88	20.5591	-1.50011	0.481947	-3.11261	0.0018544	0.0675179
ENSG00000177189.8_RPS6KA3	38.1771	1.93979	0.623936	3.10896	0.00187744	0.0677384
ENSG00000115594.7_IL1R1	6.13004	-3.60857	1.16221	-3.10493	0.00190325	0.0677384
ENSG00000077458.8_FAM76B	34.5695	-5.30809	1.71213	-3.10029	0.0019333	0.0677384
ENSG00000176208.4_ATAD5	2.92528	4.25583	1.37111	3.10392	0.00190973	0.0677384
ENSG00000117625.9_RCOR3	23.6246	-3.66041	1.17706	-3.10978	0.00187224	0.0677384
ENSG00000138802.7_SEC24B	13.671	2.76178	0.889237	3.10578	0.00189776	0.0677384
ENSG00000205133.7_TRIQK	8.59788	-1.7543	0.565836	-3.10036	0.00193284	0.0677384
ENSG00000161888.7_SPC24	41.4809	1.84636	0.595355	3.10127	0.00192692	0.0677384
ENSG00000130005.7_GAMT	3.4988	-2.40468	0.775163	-3.10216	0.00192112	0.0677384
ENSG00000159147.13_DONSON	19.566	3.81103	1.22679	3.10649	0.00189321	0.0677384
ENSG00000214367.3_HAUS3	117.532	1.2862	0.413791	3.10832	0.00188155	0.0677384
ENSG00000103126.10_AXIN1	4.92589	4.71342	1.51705	3.10696	0.00189019	0.0677384
ENSG00000102781.9_KATNAL1	8.56896	3.4196	1.10247	3.10178	0.00192364	0.0677384
ENSG00000224051.2_GLTPD1	6.03837	-5.49469	1.77476	-3.09603	0.00196133	0.0681282
ENSG00000185432.10_METTL7A	24.8579	-1.75885	0.56804	-3.09635	0.00195922	0.0681282
ENSG00000141376.16_BCAS3	2.77547	3.02814	0.977713	3.09716	0.00195382	0.0681282
ENSG00000114126.13_TFDP2	65.1585	-1.54979	0.500945	-3.09373	0.00197658	0.06832
ENSG00000176320.2_RP11-404O13.5	19.4282	-1.92135	0.621096	-3.09349	0.00197816	0.06832
ENSG00000110852.4_CLEC2B	427.403	1.36572	0.441652	3.0923	0.00198612	0.0683994
ENSG00000135372.4_NAT10	5.5382	-2.95605	0.956566	-3.09028	0.00199969	0.0686711
ENSG00000211772.4_TRBC2	1530.97	1.50564	0.487438	3.08888	0.00200915	0.0688007
ENSG00000111907.16_TPD52L1	3.45661	-2.45837	0.797769	-3.08156	0.00205919	0.0703148
ENSG00000176407.13_KCMF1	57.5241	-2.00579	0.652089	-3.07595	0.00209836	0.0705692
ENSG00000145982.7_FARS2	5.77931	-5.40273	1.75514	-3.07823	0.00208236	0.0705692
ENSG00000164626.8_KCNK5	29.4073	4.76485	1.54852	3.07704	0.00209067	0.0705692
ENSG00000213186.3_TRIM59	258.099	1.75052	0.568765	3.07776	0.00208563	0.0705692
ENSG00000169035.7_KLK7	11.4836	-2.79432	0.90858	-3.07548	0.00210166	0.0705692
ENSG00000182944.13_EWSR1	275.421	1.3187	0.42846	3.07777	0.00208554	0.0705692
ENSG00000167487.7_KLHL26	3.33038	-3.82974	1.24628	-3.07293	0.00211969	0.0708774
ENSG00000067560.6_RHOA	260.191	1.46388	0.476443	3.07252	0.00212257	0.0708774
ENSG00000167286.5_CD3D	484.076	1.86312	0.607079	3.069	0.00214779	0.0715219
ENSG00000267439.1_AC002398.11	3.57009	-2.42072	0.789411	-3.06649	0.00216586	0.0718653
ENSG00000198464.9_ZNF480	7.0302	2.69512	0.879991	3.06266	0.00219377	0.0718653
ENSG00000205060.6_SLC35B4	6.2203	-2.49667	0.814616	-3.06484	0.00217785	0.0718653
ENSG00000205777.13_GAGE1	6.65121	-5.47461	1.78633	-3.06472	0.00217875	0.0718653
ENSG00000164631.14_ZNF12	3.6435	-2.72991	0.891342	-3.06269	0.00219357	0.0718653
ENSG00000116299.12_KIAA1324	53.8547	1.88281	0.61455	3.06372	0.00218602	0.0718653
ENSG00000120451.6_SNX19	7.32898	5.54938	1.81477	3.0579	0.00222895	0.0727825
ENSG00000138185.12_ENTPD1	56.5017	1.43712	0.470069	3.05725	0.00223381	0.0727825
ENSG00000237036.4_ZEB1-AS1	6.42784	-3.05358	1.00001	-3.05355	0.00226148	0.0734859
ENSG00000165272.10_AQP3	9.54996	-5.1352	1.68273	-3.05171	0.0022754	0.0737399
ENSG00000213413.2_PVRIG	75.797	3.83498	1.25765	3.04932	0.00229361	0.0741316
ENSG00000197536.6_C5orf56	47.4795	3.079	1.01021	3.04787	0.00230467	0.0742904
ENSG00000164463.8_CREBRF	32.9427	2.07669	0.681565	3.04694	0.00231182	0.0743224
ENSG00000160593.13_AMICA1	35.6009	4.17105	1.36959	3.04548	0.00232308	0.0744864
ENSG00000146223.10_RPL7L1	144.53	-0.952286	0.31295	-3.04293	0.00234285	0.0749217
ENSG00000127507.13_EMR2	5.56532	1.96707	0.646727	3.04158	0.00235342	0.074926
ENSG00000143442.17_POGZ	37.8208	-1.86768	0.614122	-3.04121	0.00235628	0.074926
ENSG00000197124.7_ZNF682	6.81144	2.79432	0.919021	3.04054	0.00236158	0.074926
ENSG00000100731.11_PCNX	9.81299	2.21961	0.730389	3.03894	0.00237412	0.0751266
ENSG00000074755.10_ZZEF1	14.7878	2.75351	0.906596	3.03719	0.00238792	0.0751698
ENSG00000110719.5_TCIRG1	56.4429	2.86005	0.941477	3.03784	0.00238283	0.0751698
ENSG00000250251.2_PKD1P6	4.97526	-2.38473	0.785481	-3.03601	0.00239729	0.0752686
ENSG00000179841.8_AKAP5	24.7505	1.95884	0.645737	3.0335	0.00241737	0.0757026
ENSG00000164736.5_SOX17	63.9735	-4.20553	1.38676	-3.03264	0.00242427	0.0757224
ENSG00000206560.6_ANKRD28	54.8279	2.20819	0.728437	3.0314	0.00243419	0.0758364
ENSG00000137441.7_FGFBP2	5.58234	-6.02298	1.98776	-3.03003	0.00244528	0.0758413
ENSG00000081237.14_PTPRC	233.335	1.42409	0.470022	3.02983	0.0024469	0.0758413
ENSG00000163110.10_PDLIM5	44.4512	-1.39309	0.459914	-3.02902	0.00245346	0.0758502
ENSG00000123453.12_SARDH	21.0673	2.30428	0.760976	3.02806	0.00246133	0.0758994
ENSG00000140612.9_SEC11A	65.4357	2.4058	0.794906	3.02652	0.0024739	0.0760928
ENSG00000099282.5_TSPAN15	5.06342	-5.88335	1.94765	-3.02074	0.00252159	0.0773337
ENSG00000117262.14_GPR89A	3.15258	-4.55674	1.50881	-3.02009	0.00252704	0.0773337
ENSG00000168434.8_COG7	22.9775	-2.45467	0.813011	-3.01923	0.00253416	0.077356
ENSG00000105655.14_ISYNA1	12.4455	-4.26429	1.41427	-3.01519	0.00256819	0.0781973
ENSG00000214087.4_ARL16	39.741	1.87909	0.623713	3.01275	0.00258894	0.0786309
ENSG00000179933.4_C14orf119	29.6947	-2.97158	0.987248	-3.00997	0.00261277	0.07883
ENSG00000236737.1_GAGE12B	20.7048	-5.66651	1.88185	-3.01114	0.00260273	0.07883
ENSG00000183742.8_MACC1	7.3518	-2.75483	0.915318	-3.0097	0.00261506	0.07883
ENSG00000165215.5_CLDN3	174.775	-3.8805	1.29358	-2.99981	0.00270145	0.0812318
ENSG00000152527.9_PLEKHH2	25.7589	-1.6281	0.543451	-2.99584	0.00273686	0.0817912
ENSG00000170485.12_NPAS2	4.61234	-2.50334	0.835371	-2.99668	0.00272937	0.0817912
ENSG00000072682.14_P4HA2	6.12299	-4.44653	1.48443	-2.99546	0.00274036	0.0817912
ENSG00000213397.6_HAUS7	3.45524	-5.32584	1.77945	-2.99297	0.0027628	0.0822579
ENSG00000140995.12_DEF8	25.1545	2.96907	0.99298	2.99006	0.00278918	0.0828394
ENSG00000260669.2_AL136419.6	18.9479	-2.16509	0.725075	-2.98602	0.00282638	0.0837383
ENSG00000253276.1_CCDC71L	3.21541	-4.86186	1.62992	-2.98288	0.00285546	0.0841872
ENSG00000175793.10_SFN	3.06694	-4.86216	1.62998	-2.98295	0.00285483	0.0841872
ENSG00000158773.10_USF1	17.8306	4.75645	1.59673	2.97887	0.00289314	0.0850908
ENSG00000177989.9_ODF3B	29.6976	3.38732	1.13816	2.97612	0.00291916	0.0856477
ENSG00000143322.15_ABL2	17.7877	-1.89438	0.638014	-2.96918	0.00298595	0.0866176
ENSG00000175592.4_FOSL1	17.7838	-4.50669	1.51834	-2.96817	0.00299577	0.0866176
ENSG00000143257.7_NR1I3	3.63563	-2.49211	0.839531	-2.96846	0.00299299	0.0866176
ENSG00000128656.9_CHN1	9.17858	6.81658	2.29431	2.97108	0.00296753	0.0866176
ENSG00000214530.3_STARD10	21.8822	-2.06938	0.696788	-2.96988	0.00297914	0.0866176
ENSG00000137821.7_LRRC49	6.65503	-1.60056	0.539365	-2.96749	0.00300238	0.0866176
ENSG00000260708.1_CTA-29F11.1	26.0916	-3.27304	1.10239	-2.96904	0.0029873	0.0866176
ENSG00000106610.10_STAG3L4	6.83805	3.0291	1.02122	2.96616	0.00301543	0.086787
ENSG00000143457.6_GOLPH3L	3.79508	-5.00637	1.68848	-2.96502	0.0030266	0.0869016
ENSG00000146282.13_RARS2	9.97251	2.99913	1.01206	2.9634	0.00304264	0.0871552
ENSG00000086730.12_LAT2	20.4015	1.67769	0.567074	2.95851	0.00309133	0.0879961
ENSG00000135801.5_TAF5L	3.51968	-5.20981	1.76111	-2.95826	0.00309384	0.0879961
ENSG00000134243.7_SORT1	6.28905	-2.58599	0.873779	-2.95955	0.00308092	0.0879961
ENSG00000189319.9_FAM53B	12.011	2.48276	0.839527	2.95734	0.00310309	0.088052
ENSG00000213443.2_RP11-75L1.2	15.2289	3.26932	1.10585	2.95637	0.00311284	0.0881217
ENSG00000149541.5_B3GAT3	28.2445	-2.00088	0.677758	-2.95221	0.00315513	0.0885286
ENSG00000127616.13_SMARCA4	31.1738	-2.09699	0.710413	-2.95179	0.00315941	0.0885286
ENSG00000136286.10_MYO1G	66.7056	2.70754	0.917345	2.9515	0.00316234	0.0885286
ENSG00000135040.11_NAA35	7.3798	-3.41293	1.15591	-2.95258	0.00315132	0.0885286
ENSG00000198894.3_KIAA1737	8.01328	-2.04086	0.691501	-2.95136	0.00316383	0.0885286
ENSG00000078401.6_EDN1	64.7254	-4.37626	1.48325	-2.95046	0.00317305	0.0885815
ENSG00000152117.13_AC093838.4	23.8741	2.66803	0.906278	2.94395	0.00324058	0.0902582
ENSG00000196182.6_STK40	4.91914	-5.84187	1.98558	-2.94214	0.0032595	0.0903689
ENSG00000154920.10_EME1	4.39522	-5.38133	1.82896	-2.94229	0.00325799	0.0903689
ENSG00000233750.3_CICP27	6.42115	-2.40009	0.816508	-2.93945	0.00328794	0.0909487
ENSG00000153113.19_CAST	148.29	-1.25938	0.429241	-2.93397	0.00334653	0.0923581
ENSG00000136153.15_LMO7	16.898	-4.53031	1.54508	-2.93208	0.00336699	0.0927112
ENSG00000167258.9_CDK12	41.0583	2.11622	0.722613	2.92856	0.00340533	0.0931304
ENSG00000101966.8_XIAP	36.7379	-1.70909	0.58337	-2.92968	0.00339314	0.0931304
ENSG00000172113.4_NME6	49.9134	-0.966402	0.329988	-2.9286	0.00340491	0.0931304
ENSG00000111670.10_GNPTAB	72.4334	1.8887	0.645113	2.92771	0.00341471	0.0931762
ENSG00000154429.6_CCSAP	2.82472	-3.88027	1.32666	-2.92483	0.0034464	0.0936118
ENSG00000013583.4_HEBP1	3.78772	-3.92546	1.34242	-2.92416	0.00345391	0.0936118
ENSG00000177494.5_ZBED2	29.4174	3.87413	1.32431	2.92539	0.00344022	0.0936118
ENSG00000164338.5_UTP15	20.0332	-2.92881	1.00243	-2.92171	0.00348119	0.0936145
ENSG00000093183.9_SEC22C	39.0014	2.06296	0.706082	2.9217	0.00348131	0.0936145
ENSG00000158769.13_F11R	21.177	-1.63952	0.561008	-2.92246	0.00347282	0.0936145
ENSG00000164305.13_CASP3	4.09892	-5.57756	1.90923	-2.92137	0.00348499	0.0936145
ENSG00000010539.7_ZNF200	15.059	-1.44391	0.494488	-2.92	0.00350031	0.0938175
ENSG00000134755.10_DSC2	50.0698	-3.76029	1.29107	-2.91253	0.00358509	0.0957283
ENSG00000213064.5_SFT2D2	134.847	1.39342	0.478456	2.91233	0.00358744	0.0957283
ENSG00000125875.9_TBC1D20	22.6331	1.70057	0.584129	2.91128	0.00359947	0.095838
ENSG00000175318.7_GRAMD2	19.7775	-1.95686	0.672524	-2.90973	0.00361739	0.0961033
ENSG00000120129.5_DUSP1	594.335	-1.33262	0.458125	-2.90885	0.00362762	0.0961639
ENSG00000116353.11_MECR	4.59945	-3.09078	1.0634	-2.90652	0.00365478	0.0962784
ENSG00000170412.12_GPRC5C	3.30665	-2.47677	0.852369	-2.90574	0.00366381	0.0962784
ENSG00000002586.13_CD99	83.4189	1.30346	0.448553	2.90592	0.00366169	0.0962784
ENSG00000198142.3_SOWAHC	17.4272	-2.03196	0.698839	-2.90762	0.00364186	0.0962784
ENSG00000232628.1_RP11-365O16.3	4.71812	-2.54754	0.878751	-2.89905	0.00374293	0.0979319
ENSG00000169442.4_CD52	1572.4	1.21473	0.418936	2.89957	0.0037368	0.0979319
ENSG00000089902.8_RCOR1	9.54466	-5.00519	1.72725	-2.89777	0.00375821	0.0980063
ENSG00000110092.3_CCND1	24.3581	-3.65439	1.26124	-2.89746	0.00376199	0.0980063
ENSG00000104738.12_MCM4	22.3424	1.98782	0.686539	2.89542	0.00378646	0.0983714
ENSG00000241058.1_NSUN6	20.3656	-3.48107	1.20247	-2.89494	0.00379228	0.0983714
ENSG00000204525.10_HLA-C	1284.22	0.874877	0.303023	2.88716	0.00388735	0.0986695
ENSG00000177238.9_TRIM72	3.03963	-3.03964	1.05273	-2.88738	0.0038847	0.0986695
ENSG00000100714.11_MTHFD1	68.3646	2.08879	0.723463	2.88721	0.00388669	0.0986695
ENSG00000104728.11_ARHGEF10	5.17376	-1.73946	0.601933	-2.88978	0.00385507	0.0986695
ENSG00000244040.1_IL12A-AS1	2.59283	3.44572	1.19198	2.89074	0.00384335	0.0986695
ENSG00000176731.7_C8orf59	39.9978	1.9331	0.669663	2.88667	0.00389344	0.0986695
ENSG00000174796.8_THAP6	20.6065	1.46862	0.508501	2.88813	0.00387538	0.0986695
ENSG00000119640.4_ACYP1	11.7237	3.79695	1.31534	2.88666	0.00389356	0.0986695
ENSG00000137841.7_PLCB2	32.1301	4.77711	1.65199	2.89173	0.00383128	0.0986695
ENSG00000075420.8_FNDC3B	50.3461	-1.77277	0.612841	-2.8927	0.00381941	0.0986695
ENSG00000137364.4_TPMT	39.8798	-1.09975	0.380633	-2.88927	0.00386132	0.0986695
ENSG00000135900.3_MRPL44	11.3299	2.56017	0.887226	2.88559	0.00390681	0.0987981
ENSG00000138593.4_SECISBP2L	15.1384	3.46413	1.20172	2.88265	0.00394346	0.0993095
ENSG00000198851.5_CD3E	57.2213	1.59024	0.551578	2.88307	0.00393818	0.0993095
ENSG00000143416.16_SELENBP1	3.1409	-4.09523	1.42127	-2.88138	0.00395938	0.0995031
ENSG00000225830.6_ERCC6	6.88876	-5.46563	1.89763	-2.88024	0.00397377	0.0996575
ENSG00000198363.11_ASPH	61.1805	-1.64579	0.571562	-2.87945	0.00398364	0.0996982
ENSG00000134762.12_DSC3	6.63606	-4.58205	1.59176	-2.87859	0.00399451	0.0997637
ENSG00000124006.10_OBSL1	6.69727	-3.52076	1.22427	-2.87581	0.00402995	0.100235
ENSG00000152284.4_TCF7L1	14.4994	1.76273	0.612827	2.87639	0.00402255	0.100235
ENSG00000106484.10_MEST	10.1227	-5.27749	1.83712	-2.8727	0.0040698	0.101018
ENSG00000066044.9_ELAVL1	118.992	-1.1146	0.3881	-2.87195	0.00407953	0.101052
ENSG00000083099.6_LYRM2	53.1153	-1.39364	0.485448	-2.87084	0.00409389	0.1012
ENSG00000158234.8_FAIM	3.37357	-2.68996	0.937801	-2.86837	0.00412596	0.101202
ENSG00000091164.8_TXNL1	88.4403	-2.36645	0.825212	-2.86769	0.00413475	0.101202
ENSG00000063046.13_EIF4B	187.87	-1.67939	0.585785	-2.8669	0.00414514	0.101202
ENSG00000113742.8_CPEB4	21.1367	-2.45402	0.85613	-2.86642	0.00415149	0.101202
ENSG00000155465.14_SLC7A7	19.9864	1.70175	0.593594	2.86686	0.00414566	0.101202
ENSG00000100139.9_MICALL1	17.7049	-2.61309	0.911187	-2.86779	0.0041335	0.101202
ENSG00000242086.4_LINC00969	123.425	-1.59293	0.555952	-2.86523	0.00416703	0.101202
ENSG00000080189.10_SLC35C2	6.43934	-5.59653	1.95316	-2.86537	0.00416528	0.101202
ENSG00000168356.7_SCN11A	5.65759	-1.88893	0.6593	-2.86506	0.00416931	0.101202
ENSG00000100578.10_KIAA0586	13.6637	2.19504	0.766863	2.86236	0.00420493	0.101862
ENSG00000112343.8_TRIM38	21.3462	-2.7272	0.953483	-2.86025	0.00423302	0.102337
ENSG00000184432.5_COPB2	53.643	-1.24226	0.434466	-2.85928	0.00424603	0.102447
ENSG00000197329.7_PELI1	136.12	1.27817	0.448315	2.85106	0.0043574	0.10418
ENSG00000168679.13_SLC16A4	10.358	-1.75335	0.615161	-2.85023	0.0043688	0.10418
ENSG00000154370.9_TRIM11	5.21012	2.93549	1.02927	2.85202	0.00434424	0.10418
ENSG00000119403.9_PHF19	7.21019	4.77357	1.67319	2.85298	0.00433118	0.10418
ENSG00000116661.9_FBXO2	4.91116	5.74588	2.01488	2.85173	0.00434824	0.10418
ENSG00000142669.9_SH3BGRL3	2203.24	1.12264	0.393885	2.85017	0.00436954	0.10418
ENSG00000128159.7_TUBGCP6	19.4131	1.88133	0.660244	2.84945	0.00437948	0.104211
ENSG00000151150.16_ANK3	7.38682	-2.3891	0.839509	-2.84583	0.00442958	0.105196
ENSG00000158470.5_B4GALT5	19.7959	-2.82911	0.994805	-2.84388	0.00445678	0.105634
ENSG00000168273.3_SMIM4	5.58327	-3.57474	1.25967	-2.83783	0.00454216	0.107121
ENSG00000173480.6_ZNF417	3.38967	-1.84086	0.648748	-2.83755	0.0045461	0.107121
ENSG00000164756.8_SLC30A8	3.13371	-2.01049	0.708267	-2.8386	0.0045312	0.107121
ENSG00000144741.13_SLC25A26	29.0863	-1.8073	0.637533	-2.83482	0.00458509	0.107527
ENSG00000225205.1_AC093818.1	5.08324	2.95545	1.04256	2.83482	0.00458518	0.107527
ENSG00000184232.4_OAF	7.53875	-2.48323	0.876077	-2.83448	0.00458999	0.107527
ENSG00000135823.9_STX6	4.61325	3.24093	1.14368	2.83377	0.00460031	0.10756
ENSG00000140030.4_GPR65	49.3736	3.47201	1.2257	2.83268	0.00461592	0.107717
ENSG00000235568.2_NFAM1	5.22687	1.83339	0.647398	2.83194	0.00462666	0.107759
ENSG00000125629.10_INSIG2	4.30743	-5.49905	1.94222	-2.83132	0.0046356	0.10776
ENSG00000047457.9_CP	4.40531	-5.67741	2.00685	-2.82901	0.00466918	0.107918
ENSG00000215269.5_GAGE12G	20.4618	-6.54167	2.31208	-2.82934	0.00466447	0.107918
ENSG00000236362.5_GAGE12F	20.4618	-6.54167	2.31208	-2.82934	0.00466447	0.107918
ENSG00000186866.12_POFUT2	12.3088	-3.29146	1.16501	-2.82526	0.00472419	0.108981
ENSG00000125246.11_CLYBL	4.23767	-1.66949	0.591131	-2.82423	0.00473942	0.109116
ENSG00000259877.1_RP11-46C24.7	13.7013	-1.3683	0.484588	-2.82364	0.00474811	0.109116
ENSG00000127526.9_SLC35E1	124.036	-1.30473	0.462645	-2.82015	0.00480014	0.109894
ENSG00000235162.4_C12orf75	122.879	2.28286	0.809367	2.82055	0.00479409	0.109894
ENSG00000043039.5_BARX2	11.3719	1.80306	0.639702	2.81859	0.00482351	0.110221
ENSG00000152348.11_ATG10	20.5695	-1.67487	0.594719	-2.81623	0.00485906	0.110407
ENSG00000242259.4_C22orf39	72.727	1.86549	0.662267	2.81683	0.00485006	0.110407
ENSG00000150477.10_KIAA1328	118.293	-1.10488	0.392175	-2.81731	0.00484271	0.110407
ENSG00000078304.15_PPP2R5C	1452.42	-1.44096	0.511909	-2.81487	0.00487969	0.110667
ENSG00000135127.7_CCDC64	8.50698	4.13328	1.46963	2.81247	0.00491619	0.111078
ENSG00000162928.8_PEX13	42.5282	-1.23418	0.43878	-2.81276	0.00491183	0.111078
ENSG00000006453.9_BAIAP2L1	8.15205	-2.05486	0.730896	-2.81142	0.00493228	0.111234
ENSG00000215039.2_CD27-AS1	8.77858	-2.25865	0.803871	-2.80972	0.0049584	0.11154
ENSG00000132196.9_HSD17B7	8.00841	1.92499	0.685211	2.80934	0.0049643	0.11154
ENSG00000146674.10_IGFBP3	58.2969	-4.47659	1.59444	-2.80763	0.00499082	0.111928
ENSG00000113140.6_SPARC	6.47476	-5.03691	1.79552	-2.80527	0.00502739	0.112124
ENSG00000197857.9_ZNF44	11.3897	1.85353	0.660605	2.80581	0.00501899	0.112124
ENSG00000204176.9_SYT15	12.2209	-1.70462	0.607496	-2.80598	0.00501645	0.112124
ENSG00000225484.2_RP11-773D16.1	5.33358	-4.57265	1.63096	-2.80365	0.00505269	0.112177
ENSG00000185049.8_NELFA	25.5998	-1.34102	0.478364	-2.80334	0.00505761	0.112177
ENSG00000188042.5_ARL4C	296.542	-1.14112	0.407027	-2.80355	0.00505431	0.112177
ENSG00000197077.8_KIAA1671	8.40307	-1.72103	0.614196	-2.80209	0.00507733	0.112408
ENSG00000170653.14_ATF7	7.39751	-3.2771	1.17068	-2.79931	0.00512124	0.113173
ENSG00000213965.3_NUDT19	419.464	-1.53051	0.54711	-2.79744	0.00515101	0.113623
ENSG00000187134.8_AKR1C1	3.17536	-3.32437	1.18897	-2.79602	0.00517367	0.113915
ENSG00000123810.3_B9D2	8.06116	4.05737	1.45357	2.79132	0.00524942	0.115365
ENSG00000225720.2_RP4-742C19.12	33.065	2.61935	0.938582	2.79075	0.00525862	0.115365
ENSG00000173588.10_CCDC41	6.34464	-1.81444	0.651213	-2.78625	0.00533218	0.116767
ENSG00000272666.1_CTA-384D8.35	7.18407	7.26833	2.61028	2.7845	0.00536097	0.117185
ENSG00000132950.14_ZMYM5	9.04961	-2.32903	0.836782	-2.78332	0.00538056	0.117308
ENSG00000103066.8_PLA2G15	25.6064	1.51645	0.544898	2.78299	0.005386	0.117308
ENSG00000245888.2_CTD-3203P2.2	2.57171	-3.30187	1.18845	-2.77831	0.00546419	0.117753
ENSG00000160050.10_CCDC28B	2.81956	-3.46347	1.24674	-2.77803	0.00546902	0.117753
ENSG00000172409.5_CLP1	4.2783	-5.49107	1.97495	-2.78035	0.00542997	0.117753
ENSG00000166275.11_C10orf32	61.0935	-1.72556	0.620947	-2.77892	0.00545404	0.117753
ENSG00000134986.9_NREP	4.38766	-5.52937	1.99063	-2.77769	0.0054746	0.117753
ENSG00000139218.13_SCAF11	181.495	-1.47658	0.531329	-2.77903	0.0054521	0.117753
ENSG00000104419.10_NDRG1	62.1709	-3.11894	1.12149	-2.78108	0.00541785	0.117753
ENSG00000227195.4_MIR663A	6.52662	2.52373	0.908933	2.77658	0.00549338	0.117947
ENSG00000197776.3_KLHDC1	2.81728	2.76227	0.997044	2.77046	0.00559774	0.119974
ENSG00000105325.9_FZR1	7.15993	-3.00596	1.08599	-2.76794	0.00564115	0.120691
ENSG00000070756.9_PABPC1	1226.53	-0.797572	0.288355	-2.76594	0.00567587	0.120792
ENSG00000185475.4_TMEM179B	41.667	3.38299	1.2226	2.76704	0.00565682	0.120792
ENSG00000204856.7_FAM216A	10.6722	-1.58116	0.571641	-2.766	0.00567492	0.120792
ENSG00000125637.11_PSD4	43.2445	-1.41888	0.513707	-2.76205	0.00574401	0.1216
ENSG00000198276.9_UCKL1	4.20344	4.62868	1.67581	2.76206	0.00574387	0.1216
ENSG00000132002.3_DNAJB1	584.809	-1.20874	0.437598	-2.7622	0.00574125	0.1216
ENSG00000101265.11_RASSF2	11.1676	2.986	1.08155	2.76085	0.00576503	0.121832
ENSG00000145391.9_SETD7	16.7182	-1.74058	0.63227	-2.7529	0.00590696	0.124613
ENSG00000108506.7_INTS2	5.14368	-3.93512	1.43148	-2.74899	0.00597783	0.125889
ENSG00000124151.14_NCOA3	55.4319	-1.76377	0.642059	-2.74706	0.00601325	0.126414
ENSG00000111271.10_ACAD10	8.03893	-3.20605	1.16783	-2.7453	0.00604563	0.126654
ENSG00000144401.10_METTL21A	27.9398	-1.70018	0.619246	-2.74556	0.00604081	0.126654
ENSG00000123636.13_BAZ2B	63.7186	-1.1498	0.419091	-2.74356	0.00607777	0.126943
ENSG00000120008.11_WDR11	15.9616	-2.15227	0.784522	-2.74341	0.00608039	0.126943
ENSG00000157870.10_FAM213B	22.421	-5.92975	2.16385	-2.74037	0.00613692	0.127791
ENSG00000032742.13_IFT88	4.02563	-2.55413	0.932133	-2.74009	0.00614219	0.127791
ENSG00000071073.8_MGAT4A	72.4136	-2.19956	0.803307	-2.73813	0.00617889	0.128334
ENSG00000116691.6_MIIP	15.4156	3.57079	1.30475	2.73675	0.00620488	0.128653
ENSG00000165704.10_HPRT1	10.4369	5.45212	1.99314	2.73544	0.00622964	0.128777
ENSG00000248668.1_OXCT1-AS1	2.66535	5.04279	1.84359	2.73531	0.00623219	0.128777
ENSG00000197594.7_ENPP1	7.13302	-2.15307	0.78755	-2.73388	0.00625931	0.129117
ENSG00000050730.11_TNIP3	16.4232	1.90423	0.698061	2.72788	0.00637424	0.131264
ENSG00000134321.7_RSAD2	104.955	-2.02181	0.741621	-2.72621	0.00640665	0.131707
ENSG00000167562.7_ZNF701	3.73552	-2.0043	0.736684	-2.72071	0.00651425	0.133014
ENSG00000122574.6_WIPF3	94.4053	2.43924	0.896462	2.72096	0.00650923	0.133014
ENSG00000121988.13_ZRANB3	12.2512	-1.66148	0.610561	-2.72123	0.00650392	0.133014
ENSG00000128394.12_APOBEC3F	21.2312	3.18201	1.16889	2.72225	0.00648388	0.133014
ENSG00000267383.2_CTC-260E6.6	42.439	-1.17549	0.432729	-2.71647	0.00659823	0.134502
ENSG00000197694.9_SPTAN1	68.296	1.99265	0.734629	2.71245	0.0066787	0.134778
ENSG00000232629.4_HLA-DQB2	4.41104	-2.55144	0.940606	-2.71255	0.00667685	0.134778
ENSG00000142089.11_IFITM3	703.153	-2.00701	0.739735	-2.71315	0.00666478	0.134778
ENSG00000116127.13_ALMS1	6.99593	-2.76321	1.01837	-2.71336	0.00666052	0.134778
ENSG00000132286.7_TIMM10B	17.9238	-2.09367	0.771812	-2.71267	0.00667439	0.134778
ENSG00000127666.8_TICAM1	4.89526	-5.51354	2.03101	-2.71467	0.00663415	0.134778
ENSG00000197885.6_NKIRAS1	3.25391	-4.61292	1.70131	-2.71139	0.00670015	0.134986
ENSG00000166532.11_RIMKLB	24.818	-5.51819	2.03687	-2.70915	0.00674566	0.135362
ENSG00000103202.8_NME4	4.25679	-3.07617	1.13537	-2.7094	0.00674056	0.135362
ENSG00000128604.14_IRF5	6.09344	4.8963	1.80754	2.70881	0.00675243	0.135362
ENSG00000116641.11_DOCK7	10.6259	-1.31497	0.485849	-2.70654	0.00679892	0.136068
ENSG00000160075.10_SSU72	76.8717	-1.92087	0.710155	-2.70487	0.00683321	0.136225
ENSG00000176454.9_LPCAT4	3.17356	3.73654	1.38166	2.70439	0.00684304	0.136225
ENSG00000174326.7_SLC16A11	3.94192	5.42968	2.0071	2.70524	0.00682557	0.136225
ENSG00000138964.12_PARVG	12.9499	3.1143	1.15175	2.70396	0.00685182	0.136225
ENSG00000055070.12_SZRD1	53.2201	2.14498	0.79372	2.70244	0.00688319	0.136624
ENSG00000047932.9_GOPC	3.3229	-4.57099	1.69325	-2.69953	0.0069437	0.137464
ENSG00000100297.11_MCM5	19.8762	2.84713	1.05476	2.69931	0.00694826	0.137464
ENSG00000185499.12_MUC1	21.7732	-3.77735	1.40035	-2.69743	0.0069878	0.13802
ENSG00000125207.3_PIWIL1	2.59786	-2.23647	0.829617	-2.69579	0.00702229	0.13815
ENSG00000224113.2_RP5-837J1.2	33.4676	-2.61218	0.96929	-2.69494	0.00704007	0.13815
ENSG00000113194.8_FAF2	10.5398	-4.19506	1.55631	-2.69551	0.00702807	0.13815
ENSG00000166949.11_SMAD3	5.33024	-4.75166	1.76293	-2.69532	0.00703213	0.13815
ENSG00000100027.10_YPEL1	9.7143	-1.57183	0.583492	-2.69382	0.00706373	0.13839
ENSG00000067798.9_NAV3	6.72108	-1.97451	0.733307	-2.69261	0.00708955	0.138671
ENSG00000140848.12_CPNE2	25.3798	2.25461	0.837941	2.69066	0.00713106	0.139257
ENSG00000120306.5_CYSTM1	8.63593	-3.68475	1.37258	-2.68455	0.00726283	0.140472
ENSG00000095261.9_PSMD5	10.0198	-2.03731	0.758649	-2.68545	0.00724325	0.140472
ENSG00000123146.15_CD97	524.213	1.16789	0.434946	2.68514	0.00724989	0.140472
ENSG00000213366.8_GSTM2	9.84734	4.0401	1.50413	2.686	0.00723138	0.140472
ENSG00000185658.9_BRWD1	64.6794	1.57315	0.585477	2.68695	0.00721077	0.140472
ENSG00000102893.11_PHKB	13.6694	-1.72061	0.640934	-2.68454	0.00726301	0.140472
ENSG00000163600.8_ICOS	107.779	2.14609	0.799688	2.68366	0.00728207	0.140616
ENSG00000155229.16_MMS19	4.66715	-3.69601	1.37808	-2.682	0.00731835	0.141048
ENSG00000099810.14_MTAP	7.9204	-2.27363	0.847872	-2.68157	0.00732779	0.141048
ENSG00000126246.5_IGFLR1	156.301	2.2398	0.836225	2.67847	0.00739593	0.141934
ENSG00000155097.7_ATP6V1C1	9.30665	-2.95164	1.10201	-2.67841	0.00739729	0.141934
ENSG00000183828.10_NUDT14	21.6739	2.16223	0.807483	2.67774	0.00741201	0.141991
ENSG00000151148.9_UBE3B	5.41736	-3.54072	1.32293	-2.67643	0.00744104	0.142322
ENSG00000243649.4_CFB	76.7894	-4.18141	1.56523	-2.67144	0.00755263	0.144
ENSG00000160785.9_SLC25A44	11.6238	-1.65023	0.617619	-2.67192	0.00754184	0.144
ENSG00000117682.12_DHDDS	7.86586	-2.20878	0.827203	-2.67017	0.00758123	0.144213
ENSG00000136141.10_LRCH1	3.69414	-4.79754	1.79691	-2.66989	0.00758764	0.144213
ENSG00000105404.6_RABAC1	208.535	1.38333	0.518377	2.66858	0.00761719	0.144547
ENSG00000198081.6_ZBTB14	7.11396	-6.07909	2.2785	-2.66803	0.00762977	0.144559
ENSG00000129451.7_KLK10	51.5563	-2.05546	0.770584	-2.66741	0.00764381	0.144598
ENSG00000187860.6_CCDC157	10.9213	-1.59508	0.59816	-2.66664	0.00766137	0.144704
ENSG00000205021.9_CCL3L1	287.618	3.44537	1.29272	2.66521	0.00769412	0.145096
ENSG00000107863.12_ARHGAP21	16.2144	-2.07654	0.779554	-2.66376	0.00772727	0.145268
ENSG00000139132.10_FGD4	8.04886	-2.06812	0.776286	-2.66412	0.00771898	0.145268
ENSG00000248092.3_NNT-AS1	42.3634	-1.49379	0.561054	-2.66247	0.00775703	0.145374
ENSG00000135540.7_NHSL1	5.34275	-3.97178	1.49206	-2.66195	0.00776902	0.145374
ENSG00000177084.12_POLE	21.3238	1.15008	0.432011	2.66216	0.00776411	0.145374
ENSG00000171791.10_BCL2	46.6955	2.53635	0.953619	2.65971	0.00782079	0.145892
ENSG00000198466.8_ZNF587	72.5284	-1.46783	0.551819	-2.65998	0.00781464	0.145892
ENSG00000166435.11_XRRA1	32.5728	2.22228	0.836178	2.65766	0.00786841	0.146328
ENSG00000161533.7_ACOX1	13.1536	-1.66623	0.626848	-2.65811	0.00785795	0.146328
ENSG00000104964.10_AES	12.5884	1.74073	0.656058	2.65332	0.00797048	0.147999
ENSG00000116824.4_CD2	397.79	1.3039	0.491813	2.65121	0.00802044	0.148698
ENSG00000168010.6_ATG16L2	28.4172	1.33755	0.504767	2.64985	0.00805281	0.14907
ENSG00000006715.11_VPS41	16.6286	-2.03573	0.768499	-2.64897	0.00807374	0.149228
ENSG00000136827.11_TOR1A	50.6352	-2.05071	0.774395	-2.64815	0.00809347	0.149365
ENSG00000128487.12_SPECC1	34.2887	-1.02826	0.388719	-2.64525	0.00816296	0.150188
ENSG00000182173.8_TSEN54	67.4603	1.70032	0.642674	2.6457	0.00815229	0.150188
ENSG00000136247.10_ZDHHC4	10.0189	-3.06487	1.1593	-2.64372	0.00819993	0.15064
ENSG00000134539.12_KLRD1	69.3594	1.55151	0.587048	2.64291	0.00821977	0.150775
ENSG00000136014.7_USP44	2.71292	-4.47083	1.69401	-2.63919	0.00831033	0.152205
ENSG00000256073.2_C21orf119	14.4293	-4.84623	1.8369	-2.63826	0.00833317	0.152392
ENSG00000225190.4_PLEKHM1	9.21239	1.57984	0.599561	2.635	0.00841378	0.153432
ENSG00000149577.11_SIDT2	17.3452	-1.23119	0.467255	-2.63493	0.00841539	0.153432
ENSG00000214756.3_METTL12	62.8676	-2.175	0.82581	-2.63378	0.00844403	0.153722
ENSG00000269919.1_RP1-134E15.3	8.93928	5.71492	2.1708	2.63263	0.00847266	0.154011
ENSG00000122140.6_MRPS2	4.8283	-4.95835	1.88419	-2.63155	0.00849956	0.154037
ENSG00000123384.9_LRP1	5.84692	-2.40028	0.912085	-2.63164	0.00849737	0.154037
ENSG00000163738.14_MTHFD2L	2.66366	-2.42681	0.923563	-2.62765	0.00859759	0.155116
ENSG00000173064.6_HECTD4	21.222	-1.51302	0.5758	-2.62769	0.00859668	0.155116
ENSG00000136280.11_CCM2	20.8846	2.21243	0.841797	2.62822	0.00858327	0.155116
ENSG00000249784.1_SCARNA22	13.1281	3.34655	1.2746	2.62556	0.00865062	0.155264
ENSG00000113532.8_ST8SIA4	47.6323	1.85632	0.706909	2.62597	0.00864019	0.155264
ENSG00000265592.1_RN7SL92P	11.8834	1.32889	0.506142	2.62553	0.00865142	0.155264
ENSG00000228300.9_C19orf24	42.9236	2.78562	1.06107	2.6253	0.00865717	0.155264
ENSG00000125630.11_POLR1B	8.08344	2.03092	0.773916	2.62421	0.00868506	0.155533
ENSG00000155545.15_MIER3	3.17368	-4.19287	1.59893	-2.62229	0.00873398	0.156176
ENSG00000118369.8_USP35	2.73811	4.35847	1.66271	2.62131	0.00875921	0.156176
ENSG00000269834.1_CTD-3018O17.3	4.05765	-1.95626	0.746297	-2.62129	0.00875971	0.156176
ENSG00000178921.9_PFAS	15.9403	-1.60177	0.611408	-2.61981	0.00879776	0.156624
ENSG00000172215.5_CXCR6	35.368	3.91622	1.49641	2.61708	0.00886852	0.157651
ENSG00000144369.8_FAM171B	4.10573	-5.5847	2.13543	-2.61526	0.00891605	0.158163
ENSG00000149115.9_TNKS1BP1	4.15005	-5.29942	2.02657	-2.61497	0.00892347	0.158163
ENSG00000188822.6_CNR2	47.1691	-1.27589	0.48841	-2.61232	0.00899295	0.15847
ENSG00000092208.12_GEMIN2	7.34269	-1.30252	0.498746	-2.61159	0.0090123	0.15847
ENSG00000104490.13_NCALD	4.15917	3.87484	1.48283	2.61314	0.00897142	0.15847
ENSG00000215513.7_PI4KAP1	3.67228	-3.11962	1.19465	-2.61132	0.00901927	0.15847
ENSG00000147123.10_NDUFB11	81.1082	1.83108	0.701267	2.6111	0.00902515	0.15847
ENSG00000184292.5_TACSTD2	221.252	-3.39122	1.29891	-2.61082	0.00903256	0.15847
ENSG00000258666.1_RP11-638I2.8	8.79598	2.53578	0.970677	2.61238	0.00899145	0.15847
ENSG00000104368.13_PLAT	10.6121	-2.59268	0.994255	-2.60766	0.00911631	0.159707
ENSG00000164292.8_RHOBTB3	7.81269	-1.50677	0.578323	-2.60542	0.00917625	0.160525
ENSG00000197808.7_ZNF461	6.9215	-2.46631	0.948007	-2.60157	0.00927979	0.162101
ENSG00000151651.11_ADAM8	50.3208	-2.74982	1.05836	-2.59819	0.00937172	0.163471
ENSG00000109684.10_CLNK	10.388	1.49786	0.577458	2.59388	0.00949008	0.165297
ENSG00000089199.5_CHGB	4.01344	-1.60509	0.61928	-2.59186	0.00954578	0.166028
ENSG00000150054.14_MPP7	7.61232	-3.72144	1.4379	-2.58811	0.00965051	0.167608
ENSG00000148690.10_FRA10AC1	3.08976	-4.29511	1.66047	-2.58669	0.00969029	0.168058
ENSG00000137642.8_SORL1	40.4642	-1.61425	0.624234	-2.58596	0.00971071	0.168171
ENSG00000115687.9_PASK	6.98778	-1.81768	0.703851	-2.58248	0.00980937	0.169394
ENSG00000259954.1_IL21R-AS1	13.6594	1.98815	0.769832	2.58258	0.00980646	0.169394
ENSG00000163818.12_LZTFL1	4.87775	-2.25501	0.873583	-2.58134	0.00984185	0.169712
ENSG00000143033.13_MTF2	34.8202	-2.30751	0.894181	-2.58059	0.00986318	0.169838
ENSG00000133731.5_IMPA1	5.67421	4.45426	1.72723	2.57885	0.00991308	0.170454
ENSG00000234252.1_AC007308.6	26.3293	-1.1978	0.46475	-2.57729	0.00995782	0.170578
ENSG00000227115.2_RP11-267C16.1	4.32344	-1.65512	0.642025	-2.57797	0.00993825	0.170578
ENSG00000112234.4_FBXL4	4.42663	-2.4812	0.962877	-2.57686	0.00997029	0.170578
ENSG00000137817.12_PARP6	15.4246	-1.66248	0.645336	-2.57615	0.00999083	0.170578
ENSG00000237268.2_RP13-492C18.2	8.36806	-6.60769	2.56474	-2.57636	0.0099848	0.170578
ENSG00000148985.15_PGAP2	8.01693	-5.71969	2.22204	-2.57407	0.0100509	0.171027
ENSG00000182979.13_MTA1	4.35644	-2.07596	0.806582	-2.57378	0.0100596	0.171027
ENSG00000129515.14_SNX6	72.1515	-2.30354	0.894872	-2.57416	0.0100485	0.171027
ENSG00000159840.11_ZYX	78.0105	1.77235	0.689017	2.57229	0.0101027	0.171519
ENSG00000232719.1_RP11-13J8.1	3.42661	-1.63661	0.636383	-2.57173	0.0101192	0.171558
ENSG00000198039.7_ZNF273	16.0279	-0.977431	0.38026	-2.57043	0.0101573	0.171734
ENSG00000160606.6_TLCD1	3.05728	-3.3049	1.28594	-2.57004	0.0101688	0.171734
ENSG00000186001.8_LRCH3	50.8466	-0.708819	0.275865	-2.56944	0.0101864	0.171734
ENSG00000121210.11_KIAA0922	6.29434	-2.96545	1.15396	-2.56979	0.0101759	0.171734
ENSG00000266290.1_RP11-159D12.10	5.8473	1.35843	0.528921	2.5683	0.0102198	0.171796
ENSG00000115661.9_STK16	4.46461	5.27983	2.05689	2.5669	0.0102611	0.171796
ENSG00000257553.1_RP11-603J24.17	3.86737	-5.49182	2.13807	-2.56859	0.0102112	0.171796
ENSG00000186448.10_ZNF197	4.53247	-1.92093	0.748291	-2.56709	0.0102557	0.171796
ENSG00000115368.5_WDR75	6.11575	-2.65567	1.03438	-2.5674	0.0102465	0.171796
ENSG00000106460.14_TMEM106B	19.1999	-1.3774	0.536929	-2.56533	0.0103078	0.171864
ENSG00000172197.9_MBOAT1	226.648	-1.3414	0.522777	-2.56592	0.0102903	0.171864
ENSG00000179151.7_EDC3	3.53133	-3.40891	1.32869	-2.56561	0.0102995	0.171864
ENSG00000154978.8_VOPP1	24.0199	2.42357	0.945879	2.56225	0.0103998	0.173158
ENSG00000100365.10_NCF4	8.54972	3.4769	1.35732	2.56159	0.0104194	0.173247
ENSG00000259715.1_CTD-3110H11.1	14.5885	1.23824	0.483562	2.56067	0.010447	0.173466
ENSG00000176890.11_TYMS	9.91589	3.20543	1.2526	2.55901	0.010497	0.174057
ENSG00000166272.12_WBP1L	4.10783	3.43402	1.34221	2.55848	0.0105132	0.174087
ENSG00000066117.10_SMARCD1	5.83818	-3.31322	1.29622	-2.55606	0.0105865	0.174823
ENSG00000114473.9_IQCG	17.8084	-2.00221	0.783263	-2.55625	0.0105809	0.174823
ENSG00000170989.8_S1PR1	41.6871	-2.88038	1.12745	-2.55478	0.0106255	0.175226
ENSG00000123091.4_RNF11	50.3182	-2.43114	0.952014	-2.55368	0.0106591	0.175302
ENSG00000048991.12_R3HDM1	49.3736	1.19855	0.469283	2.55399	0.0106495	0.175302
ENSG00000133104.8_SPG20	3.1842	-4.92112	1.92867	-2.55156	0.0107242	0.176133
ENSG00000133627.13_ACTR3B	12.3815	-1.83452	0.719267	-2.55055	0.0107554	0.176168
ENSG00000142687.13_KIAA0319L	12.9839	-1.77524	0.696002	-2.55062	0.0107531	0.176168
ENSG00000166181.8_API5	6.13892	-2.57504	1.01037	-2.54861	0.0108155	0.176911
ENSG00000125779.17_PANK2	10.5988	-1.62356	0.637608	-2.54633	0.0108863	0.17783
ENSG00000153933.5_DGKE	12.1028	-1.80627	0.709667	-2.54524	0.0109203	0.178144
ENSG00000092036.12_HAUS4	4.79809	-4.57642	1.79981	-2.54272	0.0109994	0.179193
ENSG00000266402.2_SNORA76	3.28803	-2.27118	0.893409	-2.54215	0.0110174	0.179245
ENSG00000158411.6_MITD1	30.7256	-0.992029	0.390474	-2.54057	0.011067	0.17981
ENSG00000267321.1_RP11-1094M14.11	10.2949	-1.98396	0.781291	-2.53933	0.0111064	0.179966
ENSG00000168002.7_POLR2G	130.485	2.96157	1.16628	2.53934	0.0111063	0.179966
ENSG00000163171.6_CDC42EP3	6.75041	-2.66731	1.05085	-2.53825	0.011141	0.180284
ENSG00000110717.6_NDUFS8	77.2266	1.28596	0.50687	2.53706	0.0111789	0.180656
ENSG00000268093.1_AC022154.7	2.88974	-2.4905	0.982008	-2.53613	0.0112087	0.180895
ENSG00000155363.14_MOV10	38.2985	2.34953	0.9269	2.53483	0.0112503	0.181083
ENSG00000001629.5_ANKIB1	8.27846	3.12679	1.23346	2.53496	0.0112459	0.181083
ENSG00000157593.12_SLC35B2	3.81948	-5.48014	2.16277	-2.53386	0.0112815	0.181104
ENSG00000170892.6_TSEN34	7.16165	-3.28493	1.29641	-2.53387	0.0112809	0.181104
ENSG00000204475.5_NCR3	4.88665	4.81492	1.90191	2.53163	0.0113534	0.181903
ENSG00000143520.6_FLG2	10.687	-1.21031	0.478121	-2.53138	0.0113614	0.181903
ENSG00000103196.7_CRISPLD2	33.5341	-1.58243	0.625471	-2.52998	0.011407	0.182022
ENSG00000109618.7_SEPSECS	9.91135	1.46547	0.57929	2.52976	0.011414	0.182022
ENSG00000134330.14_IAH1	482.912	-1.10256	0.435742	-2.53029	0.0113967	0.182022
ENSG00000148606.8_POLR3A	6.67471	-1.15581	0.457887	-2.52423	0.0115951	0.184666
ENSG00000137078.4_SIT1	16.6497	3.55199	1.40775	2.52317	0.0116302	0.184981
ENSG00000264284.1_AL391380.1	4.74597	1.59296	0.631505	2.52248	0.0116531	0.185102
ENSG00000160408.10_ST6GALNAC6	19.9143	1.7935	0.711423	2.521	0.011702	0.185392
ENSG00000110436.7_SLC1A2	6.69028	-2.22533	0.882611	-2.5213	0.0116923	0.185392
ENSG00000143919.10_CAMKMT	5.38021	-2.37357	0.94211	-2.51942	0.0117547	0.185497
ENSG00000178188.10_SH2B1	32.3816	1.17169	0.465041	2.51955	0.0117505	0.185497
ENSG00000169583.12_CLIC3	18.3309	3.19704	1.26884	2.51965	0.0117471	0.185497
ENSG00000184922.9_FMNL1	47.1006	1.47744	0.587197	2.51608	0.0118668	0.187023
ENSG00000168461.8_RAB31	11.7891	-3.75936	1.49456	-2.51536	0.0118912	0.187162
ENSG00000051825.10_MPHOSPH9	10.3992	1.76092	0.70033	2.51441	0.0119232	0.187422
ENSG00000157224.11_CLDN12	5.13663	-2.50532	0.9971	-2.5126	0.0119844	0.188139
ENSG00000179743.2_RP11-169K16.9	6.48237	1.44578	0.575843	2.51072	0.0120484	0.188599
ENSG00000249584.1_RP11-478P10.1	2.69285	2.25913	0.899641	2.51115	0.0120339	0.188599
ENSG00000138378.13_STAT4	33.5202	-2.90287	1.15635	-2.51037	0.0120605	0.188599
ENSG00000137601.11_NEK1	11.8527	-3.35539	1.33729	-2.5091	0.0121038	0.189032
ENSG00000180730.4_SHISA2	10.9913	-3.21855	1.2844	-2.50588	0.0122147	0.190517
ENSG00000118689.10_FOXO3	41.5279	-2.60497	1.03989	-2.50505	0.0122435	0.190707
ENSG00000101445.5_PPP1R16B	28.7487	2.68324	1.07132	2.50462	0.0122584	0.190707
ENSG00000114423.14_CBLB	26.5514	2.3173	0.925626	2.50349	0.0122975	0.19107
ENSG00000130522.4_JUND	1123.13	-1.15041	0.460435	-2.49852	0.0124712	0.191552
ENSG00000120662.11_MTRF1	5.45183	-1.66094	0.664654	-2.49896	0.0124558	0.191552
ENSG00000143851.11_PTPN7	47.6894	1.92072	0.76873	2.49856	0.0124701	0.191552
ENSG00000138134.7_STAMBPL1	6.39525	1.29329	0.517397	2.49962	0.0124328	0.191552
ENSG00000104331.4_IMPAD1	4.11447	-2.4104	0.964426	-2.49931	0.0124436	0.191552
ENSG00000165119.14_HNRNPK	260.088	0.84093	0.336435	2.49953	0.0124357	0.191552
ENSG00000070540.8_WIPI1	41.8961	-1.25333	0.501374	-2.49979	0.0124268	0.191552
ENSG00000169032.5_MAP2K1	24.5284	-2.94954	1.1797	-2.50025	0.0124105	0.191552
ENSG00000171984.10_C20orf196	10.0247	2.52597	1.01083	2.4989	0.012458	0.191552
ENSG00000171606.13_ZNF274	14.4049	-1.29385	0.518235	-2.49664	0.0125376	0.191944
ENSG00000177764.6_ZCCHC3	3.01999	4.94985	1.98253	2.49673	0.0125343	0.191944
ENSG00000146904.4_EPHA1	3.008	-2.12965	0.853069	-2.49645	0.0125443	0.191944
ENSG00000214145.2_LINC00887	6.52322	1.2554	0.503258	2.49455	0.0126115	0.192729
ENSG00000136932.9_C9orf156	4.73148	-5.49279	2.20244	-2.49396	0.0126326	0.192732
ENSG00000102189.12_EEA1	10.2377	-3.05349	1.22451	-2.49365	0.0126437	0.192732
ENSG00000140471.12_LINS	16.9808	1.58293	0.635253	2.49181	0.0127093	0.193246
ENSG00000157181.10_C1orf27	11.3538	-3.61689	1.45125	-2.49225	0.0126935	0.193246
ENSG00000124171.4_PARD6B	126.721	-1.77353	0.712154	-2.49038	0.0127608	0.193785
ENSG00000087053.14_MTMR2	2.98209	4.85852	1.9513	2.48989	0.0127781	0.193804
ENSG00000184207.8_PGP	5.43823	-3.89422	1.56469	-2.48881	0.012817	0.194151
ENSG00000011566.10_MAP4K3	6.4409	-6.22765	2.50341	-2.48767	0.0128584	0.194534
ENSG00000025772.7_TOMM34	3.56609	-5.37854	2.1636	-2.48592	0.0129218	0.195249
ENSG00000103502.9_CDIPT	2.95308	-4.46236	1.79677	-2.48355	0.0130081	0.196307
ENSG00000049249.4_TNFRSF9	31.8263	2.96707	1.19606	2.4807	0.0131124	0.197143
ENSG00000164611.8_PTTG1	29.6559	2.69481	1.08612	2.48112	0.0130969	0.197143
ENSG00000196975.10_ANXA4	65.3043	-1.89272	0.762842	-2.48114	0.0130963	0.197143
ENSG00000264126.1_RN7SL158P	5.25068	1.87842	0.757891	2.47848	0.0131942	0.198126
ENSG00000159388.5_BTG2	67.8607	1.86164	0.751311	2.47785	0.0132176	0.198231
ENSG00000181027.6_FKRP	5.80993	1.60154	0.646562	2.477	0.0132492	0.198459
ENSG00000127561.10_SYNGR3	8.20807	6.48958	2.62318	2.47393	0.0133634	0.199428
ENSG00000182180.9_MRPS16	69.8321	-1.43152	0.578513	-2.47449	0.0133428	0.199428
ENSG00000127903.12_ZNF835	5.52056	-1.3795	0.557596	-2.47401	0.0133606	0.199428
ENSG00000048544.5_MRPS10	58.5358	-2.6244	1.06286	-2.4692	0.0135417	0.20184
ENSG00000116679.11_IVNS1ABP	123.364	1.86016	0.753894	2.4674	0.0136097	0.202603
ENSG00000169213.6_RAB3B	13.2275	-1.21916	0.494232	-2.46678	0.0136334	0.202707
ENSG00000109436.7_TBC1D9	7.8061	-4.57288	1.85467	-2.4656	0.0136784	0.203126
ENSG00000170260.4_ZNF212	3.62117	2.62403	1.06529	2.46321	0.0137701	0.204237
ENSG00000184371.9_CSF1	23.9993	3.02766	1.22942	2.46266	0.013791	0.204296
ENSG00000102554.9_KLF5	6.1524	-5.26251	2.13824	-2.46114	0.0138497	0.204744
ENSG00000188177.9_ZC3H6	33.2853	-1.4421	0.585984	-2.461	0.0138551	0.204744
ENSG00000178605.8_GTPBP6	2.84987	-4.41373	1.79435	-2.45979	0.0139018	0.204915
ENSG00000257084.1_U47924.27	7.51216	-6.30512	2.5637	-2.45939	0.0139175	0.204915
ENSG00000175066.11_GK5	7.38636	1.38258	0.562057	2.45985	0.0138996	0.204915
ENSG00000170275.10_CRTAP	25.8978	-1.33292	0.542208	-2.45831	0.0139592	0.205278
ENSG00000228802.1_AC073641.2	7.44949	3.9607	1.61201	2.45699	0.0140105	0.205783
ENSG00000161249.16_DMKN	11.2945	-1.94975	0.794533	-2.45395	0.0141295	0.206232
ENSG00000105438.4_KDELR1	17.5166	-2.87566	1.17222	-2.45317	0.0141602	0.206232
ENSG00000075975.11_MKRN2	7.16689	-4.11873	1.67776	-2.45489	0.0140926	0.206232
ENSG00000121680.11_PEX16	11.7945	-2.1251	0.865986	-2.45396	0.0141292	0.206232
ENSG00000075790.6_BCAP29	38.3949	1.81242	0.738808	2.45316	0.0141605	0.206232
ENSG00000145979.13_TBC1D7	9.35549	2.18492	0.889833	2.45542	0.0140719	0.206232
ENSG00000184047.11_DIABLO	39.0226	-1.49113	0.607407	-2.45491	0.0140921	0.206232
ENSG00000157388.9_CACNA1D	16.6727	-1.33126	0.542978	-2.45178	0.0142152	0.206779
ENSG00000177570.9_SAMD12	5.14066	-3.70843	1.51322	-2.45069	0.0142583	0.206957
ENSG00000202198.1_RN7SK	4.50324	-5.40676	2.2063	-2.4506	0.0142617	0.206957
ENSG00000165655.14_ZNF503	11.1204	-4.18952	1.7113	-2.44815	0.0143593	0.208066
ENSG00000160219.7_GAB3	2.99851	2.99584	1.22412	2.44734	0.0143914	0.208066
ENSG00000115183.9_TANC1	2.54095	-2.85568	1.16663	-2.4478	0.0143732	0.208066
ENSG00000181513.10_ACBD4	7.56768	-1.69315	0.691944	-2.44695	0.014407	0.208066
ENSG00000166278.10_C2	9.37786	-1.80244	0.737035	-2.44553	0.0144638	0.208637
ENSG00000225157.1_AC005779.1	3.07538	-1.88581	0.771577	-2.4441	0.0145215	0.209221
ENSG00000144455.9_SUMF1	8.23418	-2.26747	0.928028	-2.44333	0.0145526	0.209419
ENSG00000169118.11_CSNK1G1	6.10658	-2.18506	0.8954	-2.44031	0.0146745	0.21079
ENSG00000130202.5_PVRL2	44.583	-2.94883	1.20848	-2.44011	0.0146828	0.21079
ENSG00000197879.10_MYO1C	14.5864	-2.3473	0.96274	-2.43814	0.0147629	0.211103
ENSG00000154127.5_UBASH3B	6.16283	2.67434	1.09654	2.43888	0.0147328	0.211103
ENSG00000181191.11_PJA1	3.57675	-4.90436	2.01106	-2.4387	0.0147401	0.211103
ENSG00000267801.1_RP11-552F3.9	3.52542	1.89425	0.777012	2.43786	0.0147744	0.211103
ENSG00000182230.7_FAM153B	7.75208	-1.57868	0.647972	-2.43635	0.0148365	0.21124
ENSG00000236883.1_AP001615.9	3.28411	-5.26041	2.15904	-2.43646	0.0148317	0.21124
ENSG00000240729.1_CTD-2301A4.3	4.01671	-1.96301	0.805601	-2.4367	0.0148218	0.21124
ENSG00000025293.11_PHF20	44.9195	-2.04919	0.843673	-2.42889	0.0151451	0.213607
ENSG00000211829.2_TRDC	3.91781	5.42056	2.231	2.42966	0.015113	0.213607
ENSG00000135925.4_WNT10A	4.53655	-5.42286	2.23076	-2.43095	0.0150594	0.213607
ENSG00000108465.10_CDK5RAP3	61.4301	1.48851	0.61271	2.42939	0.0151241	0.213607
ENSG00000138942.11_RNF185	5.46875	-4.45043	1.83291	-2.42807	0.0151794	0.213607
ENSG00000205531.8_NAP1L4	71.6839	1.76359	0.725825	2.42977	0.0151084	0.213607
ENSG00000229833.5_PET100	251.95	1.00464	0.413139	2.43172	0.0150272	0.213607
ENSG00000138442.5_WDR12	40.543	-1.08866	0.448317	-2.42833	0.0151683	0.213607
ENSG00000243452.3_NBPF15	5.10402	3.39205	1.39642	2.4291	0.0151364	0.213607
ENSG00000108523.11_RNF167	9.74322	2.19301	0.902372	2.43027	0.0150874	0.213607
ENSG00000221995.4_TIAF1	8.55136	1.79766	0.740774	2.42673	0.0152354	0.213898
ENSG00000235706.3_DICER1-AS1	20.813	-1.47706	0.608582	-2.42706	0.0152219	0.213898
ENSG00000117472.5_TSPAN1	7.2272	-6.24428	2.57371	-2.42618	0.0152588	0.213977
ENSG00000134250.13_NOTCH2	8.16847	-4.54275	1.87326	-2.42505	0.0153063	0.214395
ENSG00000264112.1_RP11-159D12.2	5.2057	-3.04122	1.25453	-2.42419	0.0153424	0.214652
ENSG00000264888.1_AL121753.1	17.9302	-1.03566	0.427367	-2.42336	0.0153779	0.214676
ENSG00000121073.9_SLC35B1	21.281	-1.7425	0.719102	-2.42316	0.0153863	0.214676
ENSG00000170027.5_YWHAG	11.959	-3.59439	1.48351	-2.42289	0.0153974	0.214676
ENSG00000163608.10_C3orf17	5.89388	-3.07919	1.27154	-2.42163	0.015451	0.215175
ENSG00000243477.1_NAT6	3.20915	-5.22095	2.15689	-2.42059	0.0154953	0.215544
ENSG00000103187.6_COTL1	259.265	1.09109	0.451298	2.41767	0.0156204	0.216474
ENSG00000263796.1_RN7SL609P	4.03355	1.27181	0.526119	2.41735	0.0156338	0.216474
ENSG00000102858.8_MGRN1	4.95581	1.77096	0.73252	2.41762	0.0156223	0.216474
ENSG00000169609.9_C15orf40	36.9817	1.03715	0.42901	2.41754	0.0156258	0.216474
ENSG00000095906.12_NUBP2	30.7792	2.01751	0.836107	2.41298	0.0158229	0.217201
ENSG00000135749.14_PCNXL2	57.558	1.25572	0.519924	2.4152	0.0157265	0.217201
ENSG00000137393.8_RNF144B	40.5783	-2.94798	1.22068	-2.41503	0.0157339	0.217201
ENSG00000123415.10_SMUG1	13.0303	-1.36066	0.563707	-2.41378	0.0157881	0.217201
ENSG00000231500.2_RPS18	1433.24	-0.64325	0.266548	-2.41326	0.0158104	0.217201
ENSG00000164049.10_FBXW12	7.23565	1.04133	0.431548	2.41301	0.0158212	0.217201
ENSG00000143995.15_MEIS1	13.7528	-3.4525	1.4309	-2.41281	0.0158301	0.217201
ENSG00000044090.4_CUL7	5.44778	-5.52616	2.28857	-2.41468	0.0157491	0.217201
ENSG00000198040.6_ZNF84	18.2062	-2.39025	0.990863	-2.4123	0.0158524	0.217261
ENSG00000129255.10_MPDU1	25.0833	0.934564	0.387547	2.41149	0.0158877	0.217498
ENSG00000168807.12_SNTB2	17.2488	1.21637	0.504834	2.40945	0.0159766	0.218467
ENSG00000082269.12_FAM135A	7.34981	-1.74988	0.726572	-2.40841	0.0160222	0.218843
ENSG00000213145.5_CRIP1	291.73	1.33134	0.552931	2.40779	0.0160493	0.218966
ENSG00000136026.9_CKAP4	3.46432	-5.33126	2.21464	-2.40728	0.016072	0.219028
ENSG00000166471.6_TMEM41B	92.3551	-1.64202	0.682318	-2.40654	0.0161045	0.219224
ENSG00000264312.1_RN7SL642P	4.86257	1.95081	0.81139	2.40428	0.0162044	0.219322
ENSG00000167595.10_C19orf55	16.6573	-1.0119	0.42092	-2.40401	0.0162163	0.219322
ENSG00000171992.8_SYNPO	3.03391	-4.55084	1.89238	-2.40483	0.0161802	0.219322
ENSG00000153107.7_ANAPC1	15.6398	-2.09561	0.871616	-2.40429	0.016204	0.219322
ENSG00000215114.3_UBXN2B	14.2297	-2.51133	1.04448	-2.40438	0.0161999	0.219322
ENSG00000133597.5_ADCK2	4.1384	-4.21586	1.75375	-2.40392	0.0162205	0.219322
ENSG00000136518.12_ACTL6A	6.44062	-2.48919	1.03601	-2.40266	0.0162764	0.219567
ENSG00000267037.1_AC005757.7	5.3562	1.30133	0.541706	2.40228	0.0162932	0.219567
ENSG00000139719.5_VPS33A	47.6358	-1.22287	0.508995	-2.40252	0.0162825	0.219567
ENSG00000138780.10_GSTCD	5.62308	-1.29898	0.540843	-2.40177	0.0163162	0.219633
ENSG00000113645.9_WWC1	4.19357	-2.28566	0.952045	-2.40079	0.0163599	0.219688
ENSG00000260400.1_RP11-119F7.5	2.71597	-1.78855	0.744986	-2.40078	0.0163603	0.219688
ENSG00000165389.6_SPTSSA	2.47205	-2.01946	0.841284	-2.40045	0.0163748	0.219688
ENSG00000140950.11_TLDC1	4.13743	-2.25408	0.939412	-2.39946	0.0164191	0.220038
ENSG00000127990.11_SGCE	4.52603	-5.41528	2.25756	-2.39873	0.0164519	0.220233
ENSG00000162231.9_NXF1	67.252	-1.57659	0.658005	-2.39601	0.0165744	0.220868
ENSG00000145375.7_SPATA5	23.0274	1.11794	0.466563	2.39612	0.0165699	0.220868
ENSG00000272983.1_RP11-508N22.12	7.73329	1.44022	0.600985	2.39644	0.0165552	0.220868
ENSG00000103111.10_MON1B	11.8178	-1.74442	0.728091	-2.39588	0.0165805	0.220868
ENSG00000257605.1_RP11-680A11.5	4.0579	-1.27064	0.530392	-2.39565	0.0165907	0.220868
ENSG00000169139.7_UBE2V2	92.3502	-1.85847	0.776635	-2.39298	0.016712	0.221994
ENSG00000117519.11_CNN3	62.3558	-2.89935	1.21159	-2.39302	0.0167104	0.221994
ENSG00000068305.13_MEF2A	9.58213	-2.0741	0.867434	-2.39108	0.016799	0.22266
ENSG00000056972.14_TRAF3IP2	46.0115	-0.847724	0.354488	-2.39141	0.016784	0.22266
ENSG00000101443.13_WFDC2	14.7031	-3.34717	1.40065	-2.38972	0.0168611	0.223239
ENSG00000004799.7_PDK4	3.32142	-4.81106	2.01441	-2.38832	0.0169256	0.223847
ENSG00000068120.10_COASY	13.3404	-4.26911	1.78897	-2.38636	0.0170161	0.224799
ENSG00000138286.10_FAM149B1	6.83313	-3.0455	1.27729	-2.38435	0.0171093	0.225783
ENSG00000104880.13_ARHGEF18	5.45967	-5.99211	2.51403	-2.38347	0.0171503	0.226077
ENSG00000197147.8_LRRC8B	2.95803	-1.93167	0.810833	-2.38232	0.0172039	0.226536
ENSG00000091640.3_SPAG7	31.3501	1.42652	0.599093	2.38113	0.0172596	0.227023
ENSG00000140307.6_GTF2A2	91.3784	1.51356	0.635826	2.38046	0.0172911	0.22719
ENSG00000158290.12_CUL4B	3.14622	-4.34649	1.82678	-2.37932	0.0173447	0.2274
ENSG00000080839.7_RBL1	13.1797	1.66199	0.698495	2.37939	0.0173413	0.2274
ENSG00000172508.6_CARNS1	4.86815	5.89953	2.48145	2.37745	0.0174326	0.228058
ENSG00000100030.10_MAPK1	14.4501	-1.64469	0.691704	-2.37773	0.0174195	0.228058
ENSG00000013810.14_TACC3	3.595	-3.84691	1.61856	-2.37674	0.0174664	0.228114
ENSG00000104756.11_KCTD9	21.4819	2.9298	1.23279	2.37657	0.0174747	0.228114
ENSG00000131148.4_EMC8	11.7136	2.80248	1.18008	2.37483	0.017557	0.228942
ENSG00000116717.7_GADD45A	341.222	-1.31826	0.55544	-2.37336	0.0176271	0.229608
ENSG00000106771.8_TMEM245	8.10789	-2.38621	1.00566	-2.37279	0.0176544	0.229716
ENSG00000101695.4_RNF125	87.4231	1.06679	0.450004	2.37062	0.0177583	0.230572
ENSG00000175470.14_PPP2R2D	6.51229	-2.1123	0.891001	-2.3707	0.0177543	0.230572
ENSG00000167355.3_AC104389.28	2.77122	-1.77479	0.750373	-2.36521	0.0180199	0.233717
ENSG00000125388.15_GRK4	23.6071	-1.26097	0.533486	-2.36365	0.0180959	0.23395
ENSG00000185641.5_CTD-2287O16.1	314.709	-1.06082	0.448745	-2.36397	0.0180801	0.23395
ENSG00000111666.6_CHPT1	8.84939	1.86703	0.789737	2.36412	0.0180729	0.23395
ENSG00000182899.10_RPL35A	721.365	-0.830902	0.351755	-2.36216	0.0181688	0.234642
ENSG00000124333.10_VAMP7	14.4327	-3.64968	1.54593	-2.36083	0.0182341	0.234733
ENSG00000197312.7_DDI2	14.3715	1.64366	0.696037	2.36146	0.0182032	0.234733
ENSG00000255302.3_EID1	173.114	1.82564	0.77327	2.36093	0.018229	0.234733
ENSG00000107130.6_NCS1	5.80639	-2.73717	1.15974	-2.36016	0.0182672	0.234909
ENSG00000196935.4_SRGAP1	18.5101	-1.48645	0.630081	-2.35914	0.0183173	0.235302
ENSG00000160917.10_CPSF4	4.94374	-4.29214	1.8206	-2.35754	0.0183965	0.236069
ENSG00000179750.11_APOBEC3B	4.66481	-5.76597	2.4469	-2.35644	0.018451	0.236266
ENSG00000160741.12_CRTC2	7.37873	1.86597	0.791773	2.3567	0.0184383	0.236266
ENSG00000156787.12_TBC1D31	6.82472	-1.73711	0.738107	-2.35346	0.0185995	0.237916
ENSG00000168769.8_TET2	11.8081	-1.97144	0.838124	-2.3522	0.0186626	0.23847
ENSG00000183576.8_SETD3	5.28143	-4.24086	1.80386	-2.35099	0.0187234	0.238661
ENSG00000124466.8_LYPD3	7.8813	-5.14768	2.19092	-2.34955	0.018796	0.238661
ENSG00000105640.8_RPL18A	1845.04	-0.904466	0.384773	-2.35065	0.0187408	0.238661
ENSG00000185290.3_NUPR1L	7.04042	-6.20569	2.64044	-2.35025	0.0187608	0.238661
ENSG00000172893.11_DHCR7	5.15562	-4.26573	1.81526	-2.34993	0.0187767	0.238661
ENSG00000105671.7_DDX49	5.96577	-3.63987	1.54888	-2.35	0.0187735	0.238661
ENSG00000244879.3_GABPB1-AS1	18.4401	1.50034	0.638693	2.34908	0.0188199	0.238715
ENSG00000111412.4_C12orf49	17.2656	3.55614	1.51696	2.34425	0.0190651	0.240143
ENSG00000155307.13_SAMSN1	100.586	2.01472	0.858795	2.34599	0.0189768	0.240143
ENSG00000254991.1_RP13-631K18.3	7.93551	-1.05739	0.450981	-2.34465	0.0190449	0.240143
ENSG00000108828.11_VAT1	2.5638	-3.88065	1.65482	-2.34506	0.019024	0.240143
ENSG00000170836.7_PPM1D	2.9944	-4.97874	2.12392	-2.34413	0.0190716	0.240143
ENSG00000100941.4_PNN	134.64	1.90215	0.810729	2.34622	0.018965	0.240143
ENSG00000205544.3_TMEM256	3.1043	-4.70296	2.00605	-2.34439	0.0190585	0.240143
ENSG00000177337.3_DLGAP1-AS1	8.54423	2.49934	1.0677	2.34086	0.0192395	0.240295
ENSG00000120616.11_EPC1	401.999	0.991428	0.423501	2.34103	0.0192306	0.240295
ENSG00000167094.11_TTC16	5.70438	1.52354	0.650972	2.34041	0.0192625	0.240295
ENSG00000081665.9_ZNF506	64.9914	-0.914009	0.390479	-2.34074	0.0192458	0.240295
ENSG00000233382.5_NKAPP1	2.97057	-1.80069	0.769147	-2.34115	0.0192244	0.240295
ENSG00000259242.2_AC002306.1	3.28376	3.04906	1.30244	2.34104	0.0192303	0.240295
ENSG00000256525.2_POLG2	3.17794	2.74091	1.17033	2.342	0.0191809	0.240295
ENSG00000163364.5_AC017048.3	20.1878	-2.16696	0.925024	-2.3426	0.0191498	0.240295
ENSG00000107929.10_LARP4B	19.689	-2.75351	1.17516	-2.3431	0.0191245	0.240295
ENSG00000112303.9_VNN2	7.24815	6.14511	2.62686	2.33934	0.0193179	0.240489
ENSG00000132781.13_MUTYH	10.4691	-1.71743	0.734053	-2.33966	0.0193015	0.240489
ENSG00000171503.7_ETFDH	11.4364	-1.54059	0.658914	-2.33808	0.0193831	0.240903
ENSG00000257122.1_RRN3P3	7.30431	2.20246	0.942179	2.33762	0.0194069	0.240903
ENSG00000171475.9_WIPF2	14.9781	1.24304	0.531773	2.33754	0.019411	0.240903
ENSG00000157330.5_C1orf158	6.14301	-1.00478	0.429928	-2.33708	0.0194352	0.240956
ENSG00000105397.9_TYK2	35.8977	1.47875	0.633786	2.3332	0.0196375	0.242966
ENSG00000273329.1_RP11-448A19.1	18.4471	1.31576	0.563913	2.33326	0.0196345	0.242966
ENSG00000154274.10_C4orf19	2.75157	-1.61525	0.692441	-2.33269	0.0196644	0.243051
ENSG00000249115.4_HAUS5	13.2874	-2.0007	0.858273	-2.33108	0.0197491	0.24335
ENSG00000109685.13_WHSC1	21.5001	-1.34738	0.577987	-2.33115	0.0197454	0.24335
ENSG00000134575.5_ACP2	2.66139	-4.17488	1.79076	-2.33134	0.0197352	0.24335
ENSG00000111348.4_ARHGDIB	975.717	0.831399	0.356807	2.33011	0.0198005	0.243736
ENSG00000090339.4_ICAM1	13.1109	-2.37847	1.02118	-2.32914	0.0198519	0.24412
ENSG00000249042.1_CTD-2015H6.3	3.9652	-2.12243	0.912108	-2.32695	0.0199681	0.244673
ENSG00000164109.9_MAD2L1	14.9742	1.2515	0.537645	2.32775	0.0199253	0.244673
ENSG00000235098.4_ANKRD65	6.7816	-3.20799	1.37848	-2.32719	0.0199549	0.244673
ENSG00000157881.9_PANK4	2.47705	-4.52463	1.9446	-2.32676	0.0199779	0.244673
ENSG00000258792.1_RP11-944C7.1	10.2469	1.44038	0.619532	2.32496	0.0200743	0.245605
ENSG00000144048.6_DUSP11	76.2899	1.15268	0.496104	2.32346	0.0201542	0.246085
ENSG00000176155.14_CCDC57	129.329	0.582305	0.250616	2.3235	0.0201524	0.246085
ENSG00000165948.6_IFI27L1	2.95937	5.00385	2.15418	2.32286	0.0201867	0.246233
ENSG00000162366.3_PDZK1IP1	3.18685	-5.06642	2.182	-2.32192	0.0202375	0.246603
ENSG00000110057.3_UNC93B1	22.1801	-3.62319	1.56076	-2.32143	0.0202639	0.246677
ENSG00000196505.6_GDAP2	6.89627	-1.86941	0.806038	-2.31926	0.0203809	0.247845
ENSG00000239039.1_SNORD13	30.0612	1.11659	0.48152	2.31889	0.0204009	0.247845
ENSG00000241978.5_AKAP2	6.38169	-3.25825	1.40684	-2.316	0.0205581	0.249114
ENSG00000013588.5_GPRC5A	42.5595	-1.80114	0.777788	-2.31572	0.0205733	0.249114
ENSG00000135842.12_FAM129A	14.1388	-2.04084	0.881491	-2.31521	0.0206016	0.249114
ENSG00000118181.6_RPS25	1196.29	-0.895196	0.386435	-2.31655	0.0205282	0.249114
ENSG00000077157.16_PPP1R12B	6.71375	-1.73089	0.74766	-2.31508	0.0206084	0.249114
ENSG00000267053.2_CTD-3162L10.1	6.72801	2.32899	1.00654	2.31386	0.0206753	0.249425
ENSG00000135114.8_OASL	543.352	-1.14605	0.495298	-2.31386	0.0206753	0.249425
ENSG00000125835.13_SNRPB	174.28	0.916881	0.39681	2.31063	0.0208533	0.251082
ENSG00000259630.2_CTD-2262B20.1	39.0035	2.30727	0.998552	2.31061	0.0208542	0.251082
ENSG00000176623.7_RMDN1	18.8059	-1.89789	0.821599	-2.30999	0.0208887	0.251246
ENSG00000173457.6_PPP1R14B	60.3833	-2.37419	1.02807	-2.30937	0.0209231	0.25141
ENSG00000169189.12_NSMCE1	12.4688	-1.98917	0.861996	-2.30764	0.0210194	0.252316
ENSG00000164182.6_NDUFAF2	11.2918	-4.00019	1.73411	-2.30676	0.0210681	0.25265
ENSG00000099940.7_SNAP29	25.4081	-2.07015	0.898089	-2.30506	0.0211634	0.253541
ENSG00000165526.4_RPUSD4	10.6212	-1.32125	0.573321	-2.30455	0.0211919	0.253632
ENSG00000008130.11_NADK	38.3607	-2.96259	1.28586	-2.30398	0.021224	0.253765
ENSG00000160783.15_PMF1	47.0125	1.406	0.610465	2.30317	0.0212693	0.254055
ENSG00000213533.7_TMEM110	5.72253	5.95573	2.58745	2.30178	0.0213477	0.254739
ENSG00000170191.4_NANP	2.61521	-1.92403	0.837242	-2.29806	0.0215585	0.254743
ENSG00000134899.13_ERCC5	32.292	-2.28868	0.995996	-2.29788	0.0215689	0.254743
ENSG00000099308.6_MAST3	15.742	-1.94745	0.846893	-2.29953	0.021475	0.254743
ENSG00000247699.2_CTB-127C13.1	7.9576	-1.25232	0.545124	-2.29731	0.0216009	0.254743
ENSG00000164253.8_WDR41	4.51149	-3.86861	1.68329	-2.29824	0.0215482	0.254743
ENSG00000185880.8_TRIM69	31.2181	1.05084	0.457324	2.2978	0.021573	0.254743
ENSG00000096717.7_SIRT1	4.31472	-3.15582	1.37369	-2.29732	0.0216003	0.254743
ENSG00000109743.6_BST1	7.40301	-1.46247	0.635545	-2.30113	0.0213843	0.254743
ENSG00000085365.13_SCAMP1	4.72093	-1.78894	0.777596	-2.3006	0.0214143	0.254743
ENSG00000170949.13_ZNF160	13.6901	1.61881	0.703947	2.29962	0.0214699	0.254743
ENSG00000186162.6_CIDECP	42.6502	0.948007	0.412321	2.2992	0.0214937	0.254743
ENSG00000126858.12_RHOT1	3.34924	-2.68369	1.16815	-2.29738	0.021597	0.254743
ENSG00000179862.5_CITED4	3.11713	-4.20184	1.83065	-2.29528	0.0217173	0.255866
ENSG00000134802.13_SLC43A3	3.32527	-4.32246	1.88359	-2.2948	0.0217445	0.255937
ENSG00000152484.9_USP12	5.30787	-2.47459	1.07876	-2.29391	0.0217955	0.256288
ENSG00000130772.9_MED18	17.5375	-1.0389	0.453029	-2.29323	0.0218346	0.256498
ENSG00000110002.11_VWA5A	9.95826	-4.38408	1.91275	-2.29203	0.0219038	0.257061
ENSG00000169239.8_CA5B	45.5348	1.10904	0.484295	2.29	0.0220212	0.258189
ENSG00000118007.8_STAG1	5.20635	-3.67879	1.60693	-2.28933	0.02206	0.258392
ENSG00000121578.8_B4GALT4	6.44778	-1.88135	0.822185	-2.28823	0.022124	0.258892
ENSG00000147687.12_TATDN1	10.88	-1.51046	0.660337	-2.28741	0.022172	0.259202
ENSG00000107959.11_PITRM1	11.5902	-4.49394	1.96784	-2.28369	0.02239	0.261162
ENSG00000117676.9_RPS6KA1	6.35486	3.5406	1.55057	2.28342	0.0224057	0.261162
ENSG00000173889.11_PHC3	138.897	-0.980106	0.429292	-2.28307	0.0224261	0.261162
ENSG00000153832.7_FBXO36	15.4119	-1.47307	0.645095	-2.28349	0.0224015	0.261162
ENSG00000230733.2_AC092171.4	7.73911	1.17636	0.515404	2.2824	0.0224656	0.26137
ENSG00000154059.5_IMPACT	6.71037	-3.37133	1.47863	-2.28004	0.0226055	0.26199
ENSG00000204160.7_ZDHHC18	5.31141	-3.4259	1.50213	-2.28069	0.0225669	0.26199
ENSG00000173875.9_ZNF791	61.5331	-1.19614	0.524499	-2.28053	0.0225762	0.26199
ENSG00000080200.5_CRYBG3	3.93445	-5.51871	2.42032	-2.28016	0.0225983	0.26199
ENSG00000111537.4_IFNG	177.657	2.14929	0.942924	2.27939	0.022644	0.262184
ENSG00000142937.7_RPS8	430.458	-1.03293	0.453365	-2.27837	0.0227047	0.262635
ENSG00000187522.9_HSPA14	21.0648	2.41639	1.06132	2.27679	0.0227989	0.263473
ENSG00000011590.9_ZBTB32	4.02813	5.62224	2.46985	2.27635	0.0228249	0.263522
ENSG00000006555.6_TTC22	8.16398	1.86608	0.819946	2.27586	0.0228544	0.263611
ENSG00000117525.9_F3	51.2767	-2.07276	0.910971	-2.27533	0.0228859	0.263723
ENSG00000107771.11_CCSER2	29.9392	1.80507	0.793451	2.27496	0.0229083	0.263729
ENSG00000267041.1_ZNF850	34.545	-0.876686	0.385982	-2.27132	0.0231279	0.264349
ENSG00000225840.1_AC010970.2	71.8321	-0.965518	0.424925	-2.27221	0.0230738	0.264349
ENSG00000268119.1_CTD-2561J22.5	20.0635	-1.03032	0.453612	-2.27137	0.0231248	0.264349
ENSG00000153395.5_LPCAT1	3.69518	3.89942	1.71576	2.2727	0.0230442	0.264349
ENSG00000184897.4_H1FX	91.5178	1.52812	0.672837	2.27116	0.0231371	0.264349
ENSG00000261732.1_LA16c-431H6.6	7.92395	-1.14822	0.505178	-2.27289	0.0230326	0.264349
ENSG00000225410.1_AC107016.1	58.092	-3.2148	1.41442	-2.27288	0.0230336	0.264349
ENSG00000104714.9_ERICH1	31.4857	3.16695	1.39431	2.27134	0.0231267	0.264349
ENSG00000181019.8_NQO1	23.0122	-1.75157	0.772204	-2.26827	0.0233128	0.265929
ENSG00000143498.13_TAF1A	4.02679	-1.88876	0.832726	-2.26816	0.0233194	0.265929
ENSG00000131844.11_MCCC2	9.72316	1.52362	0.673158	2.2634	0.0236112	0.269003
ENSG00000182749.5_PAQR7	43.9817	-1.33947	0.592206	-2.26184	0.0237075	0.269846
ENSG00000134398.8_ERN2	5.65737	-1.39012	0.614922	-2.26065	0.0237812	0.27043
ENSG00000198046.7_ZNF667	4.42455	-0.885849	0.392461	-2.25717	0.0239977	0.27223
ENSG00000071127.12_WDR1	54.2988	2.02692	0.898205	2.25664	0.0240307	0.27223
ENSG00000103091.10_WDR59	23.0314	-0.860939	0.381547	-2.25645	0.0240427	0.27223
ENSG00000198483.8_ANKRD35	4.74756	5.69802	2.52421	2.25735	0.0239861	0.27223
ENSG00000138688.11_KIAA1109	50.98	1.9327	0.85658	2.2563	0.0240521	0.27223
ENSG00000260230.2_FRRS1L	25.1855	-1.04559	0.463646	-2.25515	0.024124	0.272689
ENSG00000196437.6_ZNF569	4.36614	3.60579	1.59907	2.25493	0.0241378	0.272689
ENSG00000110011.9_DNAJC4	13.5257	3.28319	1.45669	2.25388	0.024204	0.273182
ENSG00000165644.6_COMTD1	26.6109	3.87518	1.72158	2.25095	0.0243889	0.273735
ENSG00000122497.13_NBPF14	6.23997	-2.24	0.994941	-2.25139	0.0243609	0.273735
ENSG00000157734.9_SNX22	22.5642	-0.968778	0.430312	-2.25134	0.024364	0.273735
ENSG00000154529.10_CNTNAP3B	9.47039	1.65406	0.734351	2.25241	0.0242965	0.273735
ENSG00000261777.1_RP11-529K1.2	13.126	0.942156	0.41852	2.25116	0.0243751	0.273735
ENSG00000171861.6_RNMTL1	11.5725	-2.82303	1.25394	-2.25133	0.0243645	0.273735
ENSG00000164953.11_TMEM67	15.2413	0.99803	0.443572	2.24999	0.0244499	0.274165
ENSG00000144535.15_DIS3L2	13.4991	-1.1079	0.492534	-2.24938	0.0244884	0.274343
ENSG00000141753.5_IGFBP4	4.53038	-3.34189	1.48593	-2.24902	0.0245115	0.274348
ENSG00000084733.6_RAB10	42.047	-2.0399	0.907718	-2.24729	0.0246216	0.274563
ENSG00000141510.11_TP53	79.7043	-1.55306	0.690861	-2.24801	0.0245755	0.274563
ENSG00000053501.8_USE1	33.4931	-1.11973	0.498174	-2.24767	0.0245972	0.274563
ENSG00000170264.8_FAM161A	19.8214	-1.18097	0.525476	-2.24742	0.0246129	0.274563
ENSG00000016864.12_GLT8D1	2.73342	-2.36875	1.05437	-2.2466	0.0246655	0.274799
ENSG00000196236.8_XPNPEP3	70.8018	-0.824111	0.366887	-2.24623	0.0246894	0.274806
ENSG00000142102.11_ATHL1	50.638	1.7035	0.758502	2.24588	0.0247116	0.274806
ENSG00000151116.12_UEVLD	23.6539	-0.894471	0.398445	-2.24491	0.0247741	0.274974
ENSG00000181192.7_DHTKD1	14.6257	-1.22261	0.544694	-2.24458	0.024795	0.274974
ENSG00000268739.1_CTC-518B2.12	4.98373	-3.32639	1.48194	-2.24462	0.0247923	0.274974
ENSG00000196628.9_TCF4	5.84861	-2.10924	0.940177	-2.24346	0.0248674	0.275525
ENSG00000106714.13_CNTNAP3	16.4327	-1.09486	0.488195	-2.24268	0.0249176	0.275828
ENSG00000166401.9_SERPINB8	6.30384	-4.87015	2.17303	-2.24118	0.0250144	0.276394
ENSG00000135953.6_MFSD9	5.46769	-1.50881	0.673167	-2.24136	0.0250026	0.276394
ENSG00000235725.1_AC007389.3	11.8355	-1.49564	0.667747	-2.23983	0.0251022	0.277109
ENSG00000112297.10_AIM1	53.0854	-1.56256	0.699044	-2.23528	0.0253989	0.277295
ENSG00000074181.4_NOTCH3	17.5465	-1.13842	0.508715	-2.23784	0.0252317	0.277295
ENSG00000090621.9_PABPC4	118.101	-0.934975	0.418232	-2.23554	0.0253819	0.277295
ENSG00000271788.1_CTD-2201E18.5	4.65929	-1.61845	0.724083	-2.23517	0.0254062	0.277295
ENSG00000159596.6_TMEM69	5.5969	-5.20889	2.32904	-2.2365	0.0253193	0.277295
ENSG00000246308.1_RP11-685M7.3	9.67501	-1.24363	0.556414	-2.23507	0.0254125	0.277295
ENSG00000135269.13_TES	122.963	-1.15409	0.515994	-2.23663	0.0253107	0.277295
ENSG00000103569.5_AQP9	3.57347	-4.55715	2.03745	-2.23669	0.0253067	0.277295
ENSG00000247675.2_LRP4-AS1	3.15255	-1.31169	0.586004	-2.23837	0.0251972	0.277295
ENSG00000163155.7_LYSMD1	6.49162	-3.49461	1.56222	-2.23695	0.0252899	0.277295
ENSG00000177981.6_ASB8	13.9084	-1.37361	0.61357	-2.23872	0.0251744	0.277295
ENSG00000267379.1_CTC-548K16.5	84.1524	1.038	0.464431	2.235	0.0254172	0.277295
ENSG00000240257.2_GAGE2D	9.27282	-6.53882	2.92224	-2.2376	0.025247	0.277295
ENSG00000236296.3_GUSBP5	8.81981	-1.81442	0.812084	-2.23427	0.0254651	0.277317
ENSG00000086475.10_SEPHS1	21.6627	-4.33476	1.9401	-2.23429	0.0254637	0.277317
ENSG00000135722.4_FBXL8	3.87163	1.42347	0.637457	2.23305	0.0255459	0.277947
ENSG00000184674.8_GSTT1	10.0751	-1.93043	0.864772	-2.2323	0.0255949	0.27823
ENSG00000198286.5_CARD11	10.2171	2.19871	0.986078	2.22976	0.0257636	0.279812
ENSG00000171766.11_GATM	7.50056	-1.79574	0.805613	-2.22903	0.0258118	0.280084
ENSG00000169242.7_EFNA1	6.70702	-4.96925	2.23016	-2.22821	0.0258666	0.280426
ENSG00000236535.1_RC3H1-IT1	3.99366	-1.75179	0.786374	-2.22768	0.0259017	0.280556
ENSG00000067141.12_NEO1	4.76083	-4.38171	1.96738	-2.22718	0.0259351	0.280665
ENSG00000152763.12_WDR78	2.57567	-1.28224	0.57607	-2.22584	0.0260246	0.281367
ENSG00000241735.1_FABP5P3	7.79385	2.03417	0.914019	2.22552	0.0260465	0.281367
ENSG00000140463.9_BBS4	4.47048	3.99624	1.79634	2.22465	0.0261045	0.281742
ENSG00000126264.5_HCST	174.74	1.36906	0.615813	2.22318	0.0262037	0.282057
ENSG00000125734.9_GPR108	39.3347	2.27395	1.02277	2.22332	0.0261939	0.282057
ENSG00000196365.7_LONP1	48.5248	-1.71931	0.773355	-2.22319	0.0262031	0.282057
ENSG00000114446.4_IFT57	5.50353	-4.15085	1.8674	-2.2228	0.0262294	0.282083
ENSG00000188971.4_RP11-427H3.3	44.2707	0.923565	0.415831	2.22101	0.0263503	0.283131
ENSG00000137843.7_PAK6	3.29204	-2.2328	1.00605	-2.21937	0.0264614	0.283569
ENSG00000160226.11_C21orf2	2.65237	4.69697	2.11573	2.22002	0.0264176	0.283569
ENSG00000163347.5_CLDN1	3.11497	-4.85032	2.18529	-2.21953	0.0264505	0.283569
ENSG00000260107.1_AC005606.15	2.58447	-4.41704	1.99132	-2.21815	0.0265449	0.283709
ENSG00000101084.12_C20orf24	226.575	0.844194	0.380526	2.21849	0.0265215	0.283709
ENSG00000133065.6_SLC41A1	2.95594	4.0512	1.82629	2.21827	0.0265364	0.283709
ENSG00000253864.1_AC131025.8	3.95857	-1.82655	0.823602	-2.21776	0.0265711	0.283738
ENSG00000272009.1_RP1-313I6.12	15.493	-3.00886	1.35717	-2.21701	0.0266222	0.284033
ENSG00000088682.9_COQ9	4.41864	-4.33181	1.95466	-2.21615	0.0266813	0.284412
ENSG00000056586.11_RC3H2	14.7527	1.88468	0.850914	2.21488	0.026768	0.284538
ENSG00000099399.5_MAGEB2	5.97592	-5.82442	2.63001	-2.2146	0.0267872	0.284538
ENSG00000198663.12_C6orf89	37.1144	-2.21889	1.00175	-2.21501	0.0267593	0.284538
ENSG00000117122.9_MFAP2	7.51023	-4.83424	2.1826	-2.2149	0.0267672	0.284538
ENSG00000155744.5_FAM126B	33.9264	1.39287	0.629062	2.21419	0.0268155	0.284588
ENSG00000157542.8_KCNJ6	6.5306	-1.16043	0.524238	-2.21355	0.0268597	0.284807
ENSG00000101384.7_JAG1	17.5739	-3.72989	1.68533	-2.21315	0.0268871	0.284848
ENSG00000143164.11_DCAF6	8.63795	-3.28471	1.48577	-2.21078	0.0270507	0.28559
ENSG00000141738.9_GRB7	4.96388	-3.25722	1.47334	-2.21077	0.0270516	0.28559
ENSG00000104814.8_MAP4K1	124.243	1.48234	0.670354	2.21128	0.0270168	0.28559
ENSG00000242802.2_AP5Z1	4.30905	-3.01703	1.3642	-2.21158	0.0269956	0.28559
ENSG00000100099.16_HPS4	43.4232	1.22167	0.552968	2.20929	0.0271545	0.286176
ENSG00000122033.10_MTIF3	4.19022	4.58057	2.07319	2.20944	0.0271444	0.286176
ENSG00000196352.9_CD55	188.141	-1.72401	0.780988	-2.20748	0.0272807	0.286663
ENSG00000269825.1_CTD-3099C6.9	5.57567	-1.72648	0.78218	-2.20726	0.0272956	0.286663
ENSG00000002834.13_LASP1	36.7679	1.19342	0.540487	2.20804	0.0272413	0.286663
ENSG00000166900.10_STX3	13.8294	-1.88711	0.854791	-2.20769	0.0272659	0.286663
ENSG00000197712.7_FAM114A1	10.6837	-1.8719	0.848498	-2.20614	0.0273745	0.287242
ENSG00000157741.10_UBN2	12.0947	-1.31414	0.596004	-2.20492	0.02746	0.287889
ENSG00000100342.16_APOL1	32.6633	-1.127	0.511698	-2.20246	0.0276326	0.289448
ENSG00000223923.1_AC010136.2	7.17731	2.74027	1.2444	2.20207	0.0276601	0.289485
ENSG00000112739.12_PRPF4B	149.102	1.22537	0.556687	2.20119	0.0277226	0.289605
ENSG00000133195.7_SLC39A11	52.6561	-2.57859	1.17141	-2.20126	0.0277173	0.289605
ENSG00000136869.13_TLR4	4.24751	-5.4813	2.49049	-2.2009	0.0277434	0.289605
ENSG00000159884.7_CCDC107	64.1641	2.6514	1.20677	2.1971	0.0280132	0.29103
ENSG00000273319.1_RP11-138A9.2	663.323	-1.19806	0.545413	-2.19661	0.0280485	0.29103
ENSG00000143772.5_ITPKB	25.0906	-1.37205	0.624443	-2.19723	0.0280038	0.29103
ENSG00000129990.10_SYT5	4.64703	-1.26074	0.573927	-2.1967	0.0280419	0.29103
ENSG00000154122.8_ANKH	24.676	-1.13441	0.51614	-2.19787	0.0279586	0.29103
ENSG00000115875.14_SRSF7	397.873	0.762142	0.346721	2.19814	0.0279392	0.29103
ENSG00000118873.11_RAB3GAP2	35.535	2.4372	1.10902	2.19761	0.0279767	0.29103
ENSG00000153404.9_PLEKHG4B	6.24558	-1.73125	0.788946	-2.19438	0.0282081	0.292185
ENSG00000153904.14_DDAH1	2.54054	-4.73934	2.15951	-2.19464	0.0281894	0.292185
ENSG00000104218.9_CSPP1	6.58878	-2.71948	1.23987	-2.19336	0.0282815	0.292694
ENSG00000188613.5_NANOS1	12.5756	-1.83661	0.837778	-2.19224	0.0283622	0.293201
ENSG00000204323.5_SMIM5	3.63839	-2.11145	0.96325	-2.19201	0.028379	0.293201
ENSG00000203812.2_HIST2H2AA4	613.804	-1.10913	0.506343	-2.19048	0.0284895	0.29391
ENSG00000144645.9_OSBPL10	41.4032	-1.4508	0.662451	-2.19005	0.0285205	0.29391
ENSG00000124256.10_ZBP1	17.7806	1.76066	0.80392	2.19009	0.0285176	0.29391
ENSG00000138386.12_NAB1	48.5068	2.34503	1.07147	2.18861	0.028625	0.294484
ENSG00000169084.8_DHRSX	24.0543	1.62757	0.743565	2.18887	0.0286062	0.294484
ENSG00000121022.9_COPS5	46.278	-1.23921	0.566347	-2.18807	0.0286645	0.29464
ENSG00000130810.15_PPAN	5.46672	-4.11158	1.88139	-2.18539	0.0288599	0.296396
ENSG00000173914.7_RBM4B	3.44509	-3.6331	1.66351	-2.184	0.028962	0.296445
ENSG00000145833.11_DDX46	101.213	1.63618	0.74899	2.18452	0.028924	0.296445
ENSG00000266085.1_AL109658.1	5.25613	-1.5425	0.706274	-2.18399	0.0289628	0.296445
ENSG00000119888.6_EPCAM	94.8986	-2.99432	1.37057	-2.18472	0.0289092	0.296445
ENSG00000188785.7_ZNF548	19.3869	-1.79553	0.823397	-2.18063	0.0292107	0.296786
ENSG00000130921.3_C12orf65	24.9668	-0.982695	0.450287	-2.18237	0.0290821	0.296786
ENSG00000121858.6_TNFSF10	100.074	1.39568	0.639825	2.18134	0.0291581	0.296786
ENSG00000080947.10_CROCCP3	10.1744	1.28617	0.589841	2.18055	0.029217	0.296786
ENSG00000171451.13_DSEL	10.5725	-1.55412	0.712483	-2.18127	0.0291638	0.296786
ENSG00000126070.14_AGO3	97.365	-0.565899	0.259345	-2.18203	0.0291072	0.296786
ENSG00000198792.8_TMEM184B	4.45816	-3.02828	1.38829	-2.1813	0.0291611	0.296786
ENSG00000149573.4_MPZL2	5.04508	-5.58359	2.56064	-2.18055	0.029217	0.296786
ENSG00000178752.11_FAM132B	4.07252	-0.957368	0.438896	-2.18131	0.0291607	0.296786
ENSG00000153071.10_DAB2	3.21303	-4.18115	1.91953	-2.17821	0.0293904	0.298046
ENSG00000167641.6_PPP1R14A	13.3521	-3.64906	1.67512	-2.17839	0.029377	0.298046
ENSG00000168792.4_ABHD15	6.71847	2.05666	0.944598	2.17728	0.0294594	0.298495
ENSG00000111057.6_KRT18	291.131	-3.03517	1.39428	-2.17687	0.0294906	0.298561
ENSG00000102024.13_PLS3	7.54671	-3.30404	1.51814	-2.17637	0.0295275	0.298685
ENSG00000197363.5_ZNF517	3.09684	1.63561	0.7519	2.1753	0.0296077	0.299014
ENSG00000117394.15_SLC2A1	108.825	-1.97603	0.908671	-2.17463	0.0296577	0.299014
ENSG00000117385.11_LEPRE1	71.9022	1.05917	0.487133	2.17429	0.0296837	0.299014
ENSG00000149743.9_TRPT1	3.25863	2.2616	1.03975	2.17513	0.0296201	0.299014
ENSG00000234420.3_ZNF37BP	18.723	1.20484	0.554092	2.17444	0.0296724	0.299014
ENSG00000131242.11_RAB11FIP4	19.5084	1.02178	0.470532	2.17154	0.0298904	0.300345
ENSG00000242294.2_STAG3L5P	19.8345	-1.16355	0.535782	-2.17168	0.0298797	0.300345
ENSG00000232164.1_AC092669.3	417.559	-1.15487	0.531701	-2.17202	0.0298539	0.300345
ENSG00000268713.1_CTC-444N24.8	4.16105	-4.59279	2.11532	-2.17121	0.0299155	0.300348
ENSG00000160584.11_SIK3	3.9824	2.93036	1.35015	2.17039	0.0299773	0.300719
ENSG00000176209.7_SMIM19	43.6132	-1.40312	0.646633	-2.16988	0.030016	0.300768
ENSG00000122390.13_NAA60	3.33996	2.48578	1.1457	2.16967	0.030032	0.300768
ENSG00000228696.4_ARL17B	8.09024	-1.28701	0.59389	-2.16709	0.0302279	0.301933
ENSG00000214176.5_PLEKHM1P	29.6591	0.850931	0.392681	2.16698	0.0302364	0.301933
ENSG00000110931.14_CAMKK2	3.74474	1.44616	0.667411	2.16682	0.0302483	0.301933
ENSG00000006042.7_TMEM98	14.4066	-1.28168	0.591344	-2.16739	0.0302048	0.301933
ENSG00000162676.7_GFI1	3.14954	4.36685	2.0166	2.16546	0.0303527	0.302476
ENSG00000175029.12_CTBP2	5.51313	-4.61626	2.13172	-2.16551	0.0303483	0.302476
ENSG00000129007.10_CALML4	2.51321	4.21951	1.9498	2.16407	0.0304593	0.303289
ENSG00000123329.13_ARHGAP9	119.234	1.29809	0.599966	2.1636	0.030495	0.303394
ENSG00000147164.7_SNX12	3.14706	-4.7643	2.20249	-2.16314	0.0305301	0.303494
ENSG00000260495.1_RP11-55K13.1	12.2997	-1.13418	0.524899	-2.16075	0.0307144	0.304574
ENSG00000184277.8_TM2D3	32.1531	1.28904	0.596451	2.16119	0.0306808	0.304574
ENSG00000148120.10_C9orf3	10.7024	-1.31102	0.606731	-2.16078	0.0307121	0.304574
ENSG00000103769.5_RAB11A	44.2033	-1.57006	0.726912	-2.1599	0.0307802	0.304976
ENSG00000006712.10_PAF1	36.6651	2.16821	1.00422	2.1591	0.0308423	0.305341
ENSG00000163159.7_VPS72	12.8975	-3.37577	1.56389	-2.15858	0.0308827	0.305491
ENSG00000260083.1_MIR4519	3.27475	5.32071	2.46533	2.15822	0.0309111	0.305522
ENSG00000197608.7_ZNF841	7.48978	1.67318	0.775427	2.15775	0.0309472	0.305629
ENSG00000116704.6_SLC35D1	25.3036	-1.47367	0.683481	-2.15613	0.0310734	0.306604
ENSG00000106346.7_USP42	7.90665	2.17075	1.00692	2.15583	0.0310967	0.306604
ENSG00000108551.4_RASD1	4.52022	3.92025	1.82	2.15398	0.0312415	0.307531
ENSG00000172932.10_ANKRD13D	16.8088	-1.67638	0.778202	-2.15417	0.0312271	0.307531
ENSG00000153563.11_CD8A	312.878	1.26803	0.589064	2.15262	0.0313486	0.308334
ENSG00000273230.1_RP11-1246C19.1	13.1382	-1.08357	0.503647	-2.15145	0.0314406	0.308987
ENSG00000148814.13_LRRC27	6.97091	1.11925	0.520379	2.15083	0.0314897	0.309218
ENSG00000130844.12_ZNF331	119.741	-1.0482	0.487554	-2.14991	0.0315627	0.309683
ENSG00000163519.9_TRAT1	2.91856	5.16166	2.40222	2.14871	0.0316576	0.310363
ENSG00000126353.3_CCR7	11.762	-3.44754	1.605	-2.148	0.0317134	0.310406
ENSG00000177425.6_PAWR	32.5161	-1.1168	0.519924	-2.14801	0.0317133	0.310406
ENSG00000114744.4_COMMD2	32.5202	1.74353	0.812033	2.14712	0.0317836	0.310727
ENSG00000161813.16_LARP4	13.2291	-2.92818	1.36388	-2.14695	0.0317976	0.310727
ENSG00000187699.6_C2orf88	3.34463	-4.49535	2.09503	-2.14572	0.0318956	0.310876
ENSG00000088298.8_EDEM2	5.98676	-4.41129	2.05582	-2.14576	0.0318923	0.310876
ENSG00000158092.2_NCK1	18.7996	-2.3603	1.10046	-2.14482	0.0319671	0.310876
ENSG00000204084.8_INPP5B	38.174	-0.932368	0.434484	-2.14592	0.0318791	0.310876
ENSG00000069998.8_CECR5	2.86192	-2.39476	1.1164	-2.14508	0.0319467	0.310876
ENSG00000163492.9_CCDC141	5.69143	1.76876	0.824572	2.14506	0.031948	0.310876
ENSG00000124762.9_CDKN1A	95.0316	-1.20614	0.562502	-2.14424	0.032014	0.311081
ENSG00000133961.15_NUMB	30.3539	-1.27574	0.595074	-2.14383	0.0320466	0.311148
ENSG00000111802.9_TDP2	12.7168	4.65849	2.17381	2.14301	0.0321124	0.311183
ENSG00000114638.3_UPK1B	56.0613	0.924905	0.431648	2.14273	0.0321347	0.311183
ENSG00000249807.1_CTD-2199O4.1	10.0192	1.46186	0.682121	2.14311	0.032104	0.311183
ENSG00000263731.1_RP11-498C9.15	5.32844	-1.09508	0.511122	-2.1425	0.0321532	0.311183
ENSG00000139517.6_LNX2	8.12095	-1.31801	0.615487	-2.1414	0.0322416	0.311789
ENSG00000203411.2_AC090519.2	9.09608	1.50639	0.70363	2.14088	0.032284	0.31195
ENSG00000096060.10_FKBP5	40.4996	1.34675	0.629325	2.13999	0.0323556	0.312392
ENSG00000179284.4_DAND5	25.996	-1.07495	0.502397	-2.13964	0.0323842	0.312418
ENSG00000110697.8_PITPNM1	8.99768	1.55124	0.725196	2.13906	0.0324308	0.312618
ENSG00000028310.13_BRD9	15.2523	2.17676	1.01828	2.13768	0.0325425	0.313445
ENSG00000141446.6_ESCO1	92.7211	-1.64642	0.770606	-2.13653	0.0326364	0.313863
ENSG00000117593.8_DARS2	8.63235	-3.61088	1.69008	-2.13651	0.0326378	0.313863
ENSG00000134146.7_DPH6	52.2056	0.900303	0.421809	2.13438	0.0328115	0.313878
ENSG00000074054.13_CLASP1	22.2112	2.40897	1.12808	2.13546	0.0327233	0.313878
ENSG00000107937.14_GTPBP4	93.5603	-1.26183	0.591196	-2.13437	0.0328124	0.313878
ENSG00000156253.2_RWDD2B	25.9789	-1.311	0.614211	-2.13445	0.0328057	0.313878
ENSG00000259563.1_CTD-2329K10.1	8.07724	-2.01901	0.945924	-2.13443	0.0328073	0.313878
ENSG00000136960.8_ENPP2	3.41649	-4.85721	2.27561	-2.13447	0.0328046	0.313878
ENSG00000135506.11_OS9	35.0308	1.7131	0.802663	2.13427	0.0328211	0.313878
ENSG00000175550.3_DRAP1	83.2723	0.943215	0.44216	2.1332	0.0329083	0.314463
ENSG00000176463.9_SLCO3A1	23.04	-1.99865	0.938001	-2.13076	0.033109	0.315739
ENSG00000240350.1_AC017002.1	36.5006	2.69703	1.26561	2.13101	0.0330881	0.315739
ENSG00000105321.8_CCDC9	5.12025	-1.67098	0.784367	-2.13035	0.0331427	0.315739
ENSG00000267504.1_RP11-845C23.2	4.41864	-1.60694	0.754325	-2.13031	0.0331463	0.315739
ENSG00000196776.10_CD47	249.748	-1.47154	0.691581	-2.1278	0.0333538	0.317466
ENSG00000213085.5_CCDC19	3.04765	-5.15324	2.42297	-2.12683	0.033434	0.317854
ENSG00000158023.5_WDR66	27.5889	-0.726834	0.341776	-2.12664	0.03345	0.317854
ENSG00000011465.12_DCN	2.97191	1.61855	0.761296	2.12604	0.0334999	0.317854
ENSG00000160791.12_CCR5	58.319	2.882	1.35546	2.12622	0.0334848	0.317854
ENSG00000185236.7_RAB11B	17.3259	1.41862	0.667887	2.12404	0.0336667	0.31794
ENSG00000120158.7_RCL1	23.3925	-1.25036	0.588502	-2.12465	0.0336158	0.31794
ENSG00000135766.8_EGLN1	25.5124	2.28165	1.07356	2.12531	0.0335608	0.31794
ENSG00000168610.10_STAT3	169.852	0.712797	0.335448	2.12491	0.0335938	0.31794
ENSG00000260714.1_RP11-266L9.1	3.55071	-1.78464	0.840131	-2.12424	0.0336498	0.31794
ENSG00000168675.14_LDLRAD4	76.3703	2.2551	1.0613	2.12485	0.0335989	0.31794
ENSG00000237390.1_RP11-139I14.2	3.52853	-1.70527	0.802987	-2.12366	0.0336983	0.31799
ENSG00000115274.10_INO80B	5.31819	-2.51532	1.18479	-2.12302	0.0337524	0.318252
ENSG00000213228.5_RPL12P38	7.30857	1.12201	0.528858	2.12156	0.0338746	0.318658
ENSG00000180011.6_ZADH2	13.6381	-1.43618	0.676836	-2.1219	0.0338461	0.318658
ENSG00000196187.7_TMEM63A	6.4538	-1.12824	0.53176	-2.12171	0.0338624	0.318658
ENSG00000121236.15_TRIM6	2.53901	-1.85751	0.875704	-2.12116	0.0339081	0.318726
ENSG00000103257.4_SLC7A5	63.7045	1.32373	0.624305	2.12033	0.0339781	0.318888
ENSG00000111647.8_UHRF1BP1L	19.3039	2.50626	1.18186	2.12061	0.0339549	0.318888
ENSG00000038532.10_CLEC16A	30.5964	1.1054	0.521816	2.11837	0.0341433	0.319885
ENSG00000205403.8_CFI	65.9283	-2.15127	1.01563	-2.11817	0.0341609	0.319885
ENSG00000172673.6_THEMIS	2.90406	3.51201	1.65807	2.11813	0.0341638	0.319885
ENSG00000175061.13_C17orf76-AS1	485.405	-1.37696	0.650312	-2.11739	0.0342271	0.32023
ENSG00000133678.9_TMEM254	9.98595	-4.1333	1.95257	-2.11685	0.034273	0.320341
ENSG00000105669.8_COPE	72.5661	1.00335	0.474035	2.11662	0.034292	0.320341
ENSG00000059588.5_TARBP1	39.8795	-2.03858	0.963668	-2.11544	0.0343926	0.320785
ENSG00000011523.9_CEP68	8.3354	-1.30271	0.615804	-2.11545	0.0343912	0.320785
ENSG00000136811.12_ODF2	16.4287	-1.68309	0.796329	-2.11357	0.0345524	0.321014
ENSG00000173848.14_NET1	13.9922	-3.57249	1.69074	-2.11297	0.034603	0.321014
ENSG00000134779.10_TPGS2	69.6639	-2.35136	1.11251	-2.11355	0.0345536	0.321014
ENSG00000152601.13_MBNL1	138.157	1.22295	0.57874	2.11313	0.0345901	0.321014
ENSG00000100209.5_HSCB	42.03	-0.931225	0.440588	-2.11359	0.03455	0.321014
ENSG00000221914.4_PPP2R2A	10.494	-2.7847	1.31714	-2.1142	0.0344979	0.321014
ENSG00000160014.12_CALM3	214.095	1.10762	0.523998	2.11378	0.0345344	0.321014
ENSG00000171649.7_ZIK1	4.72401	1.99354	0.944325	2.11107	0.034766	0.322032
ENSG00000108788.7_MLX	10.0903	1.60163	0.758676	2.11108	0.0347653	0.322032
ENSG00000187210.8_GCNT1	3.93166	3.33495	1.58017	2.1105	0.0348155	0.322243
ENSG00000213699.4_SLC35F6	73.7704	-1.29239	0.612526	-2.10994	0.0348635	0.32244
ENSG00000068793.13_CYFIP1	4.89684	-3.07544	1.45841	-2.10876	0.0349652	0.322557
ENSG00000102096.9_PIM2	775.181	-1.41106	0.668972	-2.1093	0.0349184	0.322557
ENSG00000178467.13_P4HTM	3.03911	-2.3286	1.10436	-2.10856	0.0349828	0.322557
ENSG00000051108.10_HERPUD1	856.116	-0.697366	0.330715	-2.10866	0.034974	0.322557
ENSG00000159216.14_RUNX1	25.9639	1.33623	0.634239	2.10682	0.035133	0.322787
ENSG00000203485.8_INF2	5.79901	-3.45644	1.64083	-2.10652	0.0351593	0.322787
ENSG00000075568.12_TMEM131	16.213	-3.26049	1.54728	-2.10724	0.0350971	0.322787
ENSG00000184349.8_EFNA5	6.70165	-3.40649	1.61719	-2.10642	0.035168	0.322787
ENSG00000156928.4_MALSU1	9.92579	-3.59611	1.70684	-2.10688	0.0351276	0.322787
ENSG00000143222.7_UFC1	127.772	1.4582	0.692133	2.10682	0.0351334	0.322787
ENSG00000196781.9_TLE1	17.119	-2.79766	1.32967	-2.10402	0.0353766	0.324455
ENSG00000173221.9_GLRX	100.755	1.53634	0.730716	2.10251	0.0355089	0.325422
ENSG00000140181.10_HERC2P2	4.43328	3.35796	1.59772	2.10172	0.0355781	0.325809
ENSG00000132768.9_DPH2	2.77608	-5.01758	2.38911	-2.10019	0.0357123	0.326297
ENSG00000105851.6_PIK3CG	23.9046	-1.96411	0.935161	-2.10029	0.0357037	0.326297
ENSG00000143420.13_ENSA	104.192	0.881655	0.419711	2.10062	0.035674	0.326297
ENSG00000162542.9_TMCO4	3.13186	-5.19047	2.47277	-2.09906	0.035812	0.326847
ENSG00000169490.12_TM2D2	20.3059	2.26815	1.08064	2.09889	0.0358267	0.326847
ENSG00000114019.10_AMOTL2	3.77776	-3.48422	1.66048	-2.09831	0.0358773	0.327063
ENSG00000211445.7_GPX3	8.26508	-2.92288	1.39369	-2.09722	0.0359744	0.327701
ENSG00000122877.9_EGR2	2.62275	5.00488	2.38758	2.09621	0.0360634	0.328264
ENSG00000179344.12_HLA-DQB1	149.93	2.16352	1.03243	2.09556	0.0361208	0.328539
ENSG00000188266.9_HYKK	3.21554	1.50643	0.719293	2.09433	0.0362309	0.329046
ENSG00000073756.7_PTGS2	3.99837	-5.24476	2.50422	-2.09437	0.0362268	0.329046
ENSG00000172201.6_ID4	26.7593	-2.83623	1.35522	-2.09281	0.0363658	0.329775
ENSG00000154102.6_C16orf74	2.55969	-2.19057	1.04671	-2.09282	0.0363653	0.329775
ENSG00000131153.4_GINS2	5.49697	1.93795	0.926169	2.09243	0.0363996	0.329834
ENSG00000159579.9_RSPRY1	12.4851	1.44422	0.690614	2.09121	0.0365096	0.330525
ENSG00000134072.6_CAMK1	27.6584	1.86119	0.890239	2.09067	0.0365579	0.330525
ENSG00000163960.7_UBXN7	16.9311	-1.32691	0.634654	-2.09076	0.0365499	0.330525
ENSG00000162836.7_ACP6	7.73446	1.45335	0.69557	2.08944	0.0366685	0.331277
ENSG00000170385.9_SLC30A1	21.679	-2.88309	1.38013	-2.089	0.0367074	0.331381
ENSG00000110492.11_MDK	165.986	-2.44431	1.17041	-2.08842	0.03676	0.331608
ENSG00000116685.11_KIAA2013	12.8685	-2.21818	1.06231	-2.08807	0.0367915	0.331645
ENSG00000198453.8_ZNF568	27.5987	-1.13499	0.544198	-2.08562	0.0370129	0.333144
ENSG00000131373.10_HACL1	5.38694	4.26228	2.04341	2.08587	0.0369906	0.333144
ENSG00000122642.6_FKBP9	91.7548	-1.77644	0.851913	-2.08524	0.0370477	0.333209
ENSG00000135249.3_RINT1	8.09035	1.97433	0.947039	2.08474	0.0370929	0.333368
ENSG00000151881.10_C5orf28	3.65872	-2.92166	1.40167	-2.08441	0.0371227	0.333387
ENSG00000135976.12_ANKRD36	219.329	-0.934545	0.448544	-2.08351	0.037205	0.333651
ENSG00000162692.6_VCAM1	132.33	2.24949	1.07968	2.08348	0.0372072	0.333651
ENSG00000188505.4_NCCRP1	5.94912	-1.33914	0.64294	-2.08284	0.0372662	0.333932
ENSG00000090316.11_MAEA	25.3628	-1.5129	0.726677	-2.08194	0.0373478	0.334415
ENSG00000258441.1_LINC00641	5.68076	-1.75518	0.843757	-2.0802	0.0375073	0.33523
ENSG00000100949.10_RABGGTA	10.105	2.71599	1.30574	2.08004	0.0375221	0.33523
ENSG00000102921.3_N4BP1	56.1296	1.59853	0.768419	2.08028	0.0374996	0.33523
ENSG00000054598.5_FOXC1	4.25033	-3.72711	1.79337	-2.07827	0.0376844	0.336184
ENSG00000110628.9_SLC22A18	3.63654	1.80038	0.866225	2.07842	0.0376706	0.336184
ENSG00000088386.11_SLC15A1	19.5338	-1.01375	0.487909	-2.07774	0.0377331	0.33637
ENSG00000176619.6_LMNB2	3.77303	2.40481	1.15766	2.07731	0.0377733	0.336384
ENSG00000117475.9_BLZF1	10.0921	-1.32975	0.640188	-2.07712	0.0377903	0.336384
ENSG00000100242.11_SUN2	13.3705	2.2273	1.07281	2.07614	0.0378813	0.336946
ENSG00000146143.13_PRIM2	3.49283	-2.04261	0.984	-2.07583	0.03791	0.336953
ENSG00000198001.9_IRAK4	34.3706	-1.31364	0.633101	-2.07494	0.0379925	0.337438
ENSG00000100055.16_CYTH4	30.776	-1.08202	0.521674	-2.07412	0.0380679	0.337751
ENSG00000230699.2_RP11-54O7.1	2.57114	-2.07407	1.0001	-2.07387	0.0380914	0.337751
ENSG00000135870.7_RC3H1	119.34	-1.41474	0.682244	-2.07365	0.0381115	0.337751
ENSG00000130592.9_LSP1	67.6964	1.1712	0.565062	2.0727	0.0382004	0.337759
ENSG00000182827.8_ACBD3	42.2425	-2.33788	1.12801	-2.07256	0.0382132	0.337759
ENSG00000170502.8_NUDT9	9.20849	-2.02539	0.976924	-2.07324	0.0381504	0.337759
ENSG00000163564.10_PYHIN1	54.7115	1.62275	0.783012	2.07244	0.0382242	0.337759
ENSG00000258486.2_RN7SL1	14.3072	2.12676	1.0268	2.07124	0.0383365	0.338097
ENSG00000248835.2_AL357673.1	35.8415	-0.916022	0.442281	-2.07113	0.0383464	0.338097
ENSG00000169905.8_TOR1AIP2	1261.84	-0.902765	0.435878	-2.07114	0.0383456	0.338097
ENSG00000100393.9_EP300	31.5244	1.98461	0.95853	2.07048	0.0384078	0.338145
ENSG00000126522.12_ASL	8.586	-3.97985	1.92216	-2.07051	0.0384045	0.338145
ENSG00000265011.1_RN7SL315P	36.7062	-0.732674	0.353976	-2.06984	0.038467	0.33842
ENSG00000108091.10_CCDC6	52.3086	2.28297	1.10484	2.06634	0.0387965	0.339826
ENSG00000172209.4_GPR22	2.85814	-3.55413	1.72023	-2.06608	0.0388213	0.339826
ENSG00000125977.6_EIF2S2	99.6844	-1.72748	0.836	-2.06636	0.0387941	0.339826
ENSG00000126226.17_PCID2	2.9745	-2.73201	1.32164	-2.06713	0.0387217	0.339826
ENSG00000106635.3_BCL7B	61.8348	1.08522	0.525094	2.06672	0.0387607	0.339826
ENSG00000127328.17_RAB3IP	13.678	-1.37737	0.666477	-2.06664	0.0387677	0.339826
ENSG00000053371.8_AKR7A2	2.52062	4.43155	2.14522	2.06577	0.0388498	0.339826
ENSG00000272489.1_RP11-182L21.5	2.57524	-4.91026	2.37698	-2.06575	0.0388517	0.339826
ENSG00000129353.10_SLC44A2	38.271	-1.17174	0.567445	-2.06493	0.0389294	0.34026
ENSG00000164989.11_CCDC171	3.55807	-2.26936	1.09933	-2.06432	0.0389872	0.340518
ENSG00000196664.4_TLR7	6.23134	1.62269	0.786558	2.06303	0.03911	0.341344
ENSG00000142871.11_CYR61	47.8781	-3.00218	1.45674	-2.06089	0.0393133	0.342489
ENSG00000102038.11_SMARCA1	5.72727	-4.94347	2.39922	-2.06044	0.0393561	0.342489
ENSG00000261884.2_CTC-479C5.12	3.98153	1.59564	0.774451	2.06035	0.0393648	0.342489
ENSG00000169220.13_RGS14	6.55632	-2.78639	1.35204	-2.06088	0.0393145	0.342489
ENSG00000128059.4_PPAT	4.38576	-2.46355	1.1958	-2.06016	0.0393828	0.342489
ENSG00000231806.2_PCAT7	7.22527	-1.44305	0.700746	-2.05931	0.0394645	0.342743
ENSG00000205220.7_PSMB10	178.733	1.48531	0.721282	2.05927	0.0394688	0.342743
ENSG00000085563.10_ABCB1	12.6277	2.87514	1.39737	2.05754	0.0396347	0.34369
ENSG00000188171.10_ZNF626	6.79872	-1.40068	0.680677	-2.05778	0.0396113	0.34369
ENSG00000196465.6_MYL6B	16.9153	1.96986	0.957854	2.05654	0.0397309	0.34404
ENSG00000116455.9_WDR77	2.64091	-4.94673	2.40539	-2.05652	0.039732	0.34404
ENSG00000018510.8_AGPS	12.8499	3.05585	1.48662	2.05557	0.0398239	0.34459
ENSG00000222041.6_LINC00152	201.622	1.25521	0.611009	2.05432	0.0399449	0.345389
ENSG00000173681.12_CXorf23	11.9953	-1.33869	0.651932	-2.05342	0.0400318	0.345893
ENSG00000184900.11_SUMO3	158.548	1.02846	0.501098	2.05241	0.0401302	0.346495
ENSG00000228434.1_AC004951.6	6.46433	-1.70572	0.831445	-2.05151	0.0402176	0.347002
ENSG00000158552.8_ZFAND2B	35.9094	2.48741	1.21272	2.05111	0.0402561	0.347087
ENSG00000164294.9_GPX8	18.3274	-1.32136	0.644487	-2.05026	0.0403393	0.347308
ENSG00000145907.10_G3BP1	60.2379	-1.82893	0.891979	-2.05042	0.0403236	0.347308
ENSG00000126214.16_KLC1	55.8508	2.16875	1.05828	2.04931	0.040432	0.347364
ENSG00000040199.14_PHLPP2	8.00877	0.783856	0.382432	2.04966	0.0403975	0.347364
ENSG00000106462.6_EZH2	104.684	1.61212	0.786572	2.04956	0.0404078	0.347364
ENSG00000159842.10_ABR	10.6088	2.05254	1.00227	2.04789	0.0405705	0.34806
ENSG00000135441.3_BLOC1S1	55.5539	1.43318	0.699808	2.04796	0.0405637	0.34806
ENSG00000174842.12_GLMN	7.01948	-3.20523	1.56574	-2.04711	0.0406475	0.348473
ENSG00000263626.1_AL392111.1	17.759	-0.8734	0.426865	-2.04608	0.0407484	0.34909
ENSG00000104524.9_PYCRL	22.2704	1.38261	0.676109	2.04494	0.0408604	0.349557
ENSG00000123124.9_WWP1	31.6691	-2.69386	1.31733	-2.04494	0.0408607	0.349557
ENSG00000184640.13_SEPT9	30.8191	1.6822	0.822943	2.04412	0.0409413	0.349999
ENSG00000062725.5_APPBP2	6.43565	-1.1536	0.564563	-2.04335	0.0410175	0.350035
ENSG00000151532.9_VTI1A	55.4488	1.00331	0.491047	2.0432	0.0410324	0.350035
ENSG00000177553.6_RP11-56N19.5	7.48892	1.39489	0.682651	2.04334	0.0410184	0.350035
ENSG00000145736.10_GTF2H2	21.5235	-1.2023	0.588535	-2.04287	0.0410649	0.350065
ENSG00000114850.2_SSR3	223.514	-1.11393	0.545369	-2.04252	0.0410995	0.350113
ENSG00000247193.2_RP11-431M7.3	3.79867	2.0957	1.02626	2.04207	0.0411444	0.350249
ENSG00000117115.8_PADI2	4.67845	-2.99571	1.46748	-2.04141	0.0412105	0.350565
ENSG00000134049.3_IER3IP1	42.2185	2.12919	1.04353	2.04038	0.0413123	0.351184
ENSG00000198521.7_ZNF43	13.0879	-1.14557	0.561842	-2.03896	0.0414538	0.352139
ENSG00000114993.11_RTKN	3.04993	-4.99036	2.4481	-2.03847	0.0415033	0.352311
ENSG00000206195.6_AP000525.9	5.59282	-2.19781	1.07835	-2.03812	0.0415375	0.352355
ENSG00000165359.10_DDX26B	15.1892	3.03408	1.48967	2.03674	0.0416757	0.352503
ENSG00000165102.10_HGSNAT	30.7519	-0.809265	0.397205	-2.0374	0.0416103	0.352503
ENSG00000089220.4_PEBP1	141.003	1.41369	0.694276	2.0362	0.0417299	0.352503
ENSG00000264276.1_RN7SL287P	3.84051	-1.48285	0.728103	-2.0366	0.0416905	0.352503
ENSG00000035928.10_RFC1	61.3869	1.31223	0.644388	2.0364	0.0417106	0.352503
ENSG00000100290.2_BIK	7.3829	-3.28304	1.61196	-2.03667	0.0416828	0.352503
ENSG00000259380.1_RP11-346D14.1	289.047	-0.745423	0.366169	-2.03573	0.0417773	0.352656
ENSG00000187742.10_SECISBP2	30.411	-1.36077	0.669173	-2.0335	0.0420016	0.353078
ENSG00000196526.6_AFAP1	3.20312	-1.32866	0.65321	-2.03405	0.0419461	0.353078
ENSG00000167775.6_CD320	22.2615	1.72047	0.845702	2.03437	0.0419147	0.353078
ENSG00000176641.6_RNF152	27.6029	-2.70866	1.33182	-2.03381	0.0419708	0.353078
ENSG00000144749.9_LRIG1	6.93015	-2.66083	1.30849	-2.03352	0.0419999	0.353078
ENSG00000091317.7_CMTM6	62.8624	1.42568	0.701099	2.0335	0.0420024	0.353078
ENSG00000125356.6_NDUFA1	90.896	0.961361	0.473194	2.03164	0.0421901	0.35422
ENSG00000170017.8_ALCAM	9.26297	-2.65784	1.30827	-2.03157	0.042197	0.35422
ENSG00000127445.9_PIN1	147.369	0.946585	0.466344	2.0298	0.0423768	0.355019
ENSG00000261641.2_LA16c-390E6.5	12.5941	-3.12115	1.53748	-2.03004	0.0423523	0.355019
ENSG00000170955.9_PRKCDBP	3.10999	-5.0314	2.47986	-2.0289	0.0424683	0.355019
ENSG00000102524.7_TNFSF13B	6.53262	-4.40626	2.17162	-2.02902	0.0424567	0.355019
ENSG00000132906.13_CASP9	5.09601	-1.82951	0.901559	-2.02928	0.0424299	0.355019
ENSG00000204842.10_ATXN2	32.5159	-0.807039	0.397606	-2.02975	0.0423824	0.355019
ENSG00000166710.13_B2M	11736.9	0.511063	0.25193	2.02859	0.0425001	0.355039
ENSG00000125991.14_ERGIC3	64.5192	-1.00966	0.497909	-2.0278	0.0425809	0.355468
ENSG00000144034.10_TPRKB	46.7882	-1.62889	0.803829	-2.02642	0.0427219	0.355479
ENSG00000065183.11_WDR3	9.16976	-1.36673	0.674103	-2.02749	0.0426127	0.355479
ENSG00000163399.11_ATP1A1	79.7815	-1.0423	0.514209	-2.027	0.0426623	0.355479
ENSG00000163516.9_ANKZF1	24.0869	-1.51718	0.748575	-2.02675	0.0426875	0.355479
ENSG00000003400.10_CASP10	10.081	-1.1738	0.579268	-2.02635	0.0427292	0.355479
ENSG00000244187.3_TMEM141	2.7393	-4.09706	2.02356	-2.02468	0.0429003	0.356167
ENSG00000167281.14_RBFOX3	8.2409	1.12224	0.554136	2.02521	0.0428457	0.356167
ENSG00000221944.3_TIGD1	13.7171	1.01932	0.503432	2.02474	0.0428936	0.356167
ENSG00000123607.10_TTC21B	2.72033	-2.04914	1.01243	-2.02399	0.0429708	0.35624
ENSG00000143226.9_FCGR2A	67.2987	-2.233	1.1032	-2.02411	0.042959	0.35624
ENSG00000108518.7_PFN1	717.516	0.720087	0.355821	2.02373	0.0429976	0.35624
ENSG00000105248.11_CCDC94	26.6966	2.49491	1.23335	2.02288	0.0430853	0.356722
ENSG00000171148.9_TADA3	10.0493	1.19433	0.590586	2.02227	0.0431484	0.356757
ENSG00000047346.8_FAM214A	21.1373	-2.58924	1.28031	-2.02235	0.0431398	0.356757
ENSG00000088826.13_SMOX	3.97459	2.45849	1.21596	2.02185	0.0431915	0.356869
ENSG00000257164.1_RP11-25I15.2	3.15223	-2.13914	1.0584	-2.02111	0.043268	0.357257
ENSG00000100523.10_DDHD1	15.4204	-1.53331	0.758784	-2.02074	0.0433062	0.357328
ENSG00000124249.5_KCNK15	4.41617	-5.68713	2.8152	-2.02015	0.0433677	0.357591
ENSG00000197670.5_RP4-724E16.2	5.15486	1.04234	0.516325	2.01877	0.0435107	0.358353
ENSG00000089123.11_TASP1	13.3064	-3.42567	1.69698	-2.01869	0.0435193	0.358353
ENSG00000153767.5_GTF2E1	3.45413	-2.11401	1.04847	-2.01627	0.0437717	0.35999
ENSG00000255067.1_RP11-47J17.1	5.84221	-1.20605	0.598262	-2.01593	0.0438075	0.35999
ENSG00000006432.11_MAP3K9	7.04731	-1.42236	0.705519	-2.01605	0.0437952	0.35999
ENSG00000124641.10_MED20	3.50828	-4.62208	2.29333	-2.01544	0.0438581	0.360125
ENSG00000245970.2_KB-1208A12.3	12.219	-1.41115	0.700252	-2.0152	0.0438835	0.360125
ENSG00000073711.6_PPP2R3A	4.25546	-1.72002	0.853705	-2.01478	0.043928	0.360245
ENSG00000139211.5_AMIGO2	18.8115	2.5694	1.27575	2.01404	0.0440057	0.360638
ENSG00000168824.10_NSG1	13.0085	-1.36595	0.678462	-2.0133	0.044083	0.361027
ENSG00000159399.5_HK2	27.7209	-2.38028	1.18266	-2.01265	0.0441515	0.361343
ENSG00000101150.13_TPD52L2	18.3428	-2.38372	1.18459	-2.01228	0.0441909	0.36142
ENSG00000250127.1_CTD-2117L12.1	19.57	-1.27926	0.636412	-2.01011	0.0444194	0.362054
ENSG00000183506.12_PI4KAP2	33.4968	0.901013	0.448301	2.00984	0.0444481	0.362054
ENSG00000176148.11_TCP11L1	5.04575	2.59688	1.29154	2.01068	0.0443594	0.362054
ENSG00000132793.7_LPIN3	9.91649	-1.47682	0.734352	-2.01105	0.0443199	0.362054
ENSG00000231336.1_AC017006.3	2.69064	-1.23578	0.614572	-2.0108	0.0443469	0.362054
ENSG00000185585.15_OLFML2A	11.5669	-1.50597	0.749129	-2.01029	0.0444002	0.362054
ENSG00000198130.10_HIBCH	2.61383	2.23827	1.11383	2.00953	0.0444812	0.36208
ENSG00000244509.3_APOBEC3C	2916.89	1.20714	0.600934	2.00877	0.044562	0.362494
ENSG00000078596.6_ITM2A	236.866	1.22635	0.610842	2.00765	0.0446809	0.363216
ENSG00000159352.11_PSMD4	119.811	-1.27096	0.633211	-2.00717	0.0447316	0.363311
ENSG00000188389.6_PDCD1	15.9852	3.06484	1.52731	2.00669	0.0447827	0.363311
ENSG00000132128.12_LRRC41	10.2919	-1.08657	0.541418	-2.0069	0.0447602	0.363311
ENSG00000139193.3_CD27	304.864	1.87465	0.934822	2.00535	0.0449256	0.364226
ENSG00000181396.8_OGFOD3	5.2105	1.47838	0.737699	2.00404	0.0450654	0.364626
ENSG00000167619.7_TMEM145	41.9825	-1.02581	0.511846	-2.00414	0.0450547	0.364626
ENSG00000111266.4_DUSP16	2.87251	-4.07002	2.03065	-2.0043	0.0450384	0.364626
ENSG00000085998.9_POMGNT1	29.8881	-0.895774	0.447636	-2.00112	0.0453793	0.36643
ENSG00000040487.8_PQLC2	6.54966	-1.8482	0.923392	-2.00153	0.0453351	0.36643
ENSG00000137880.4_GCHFR	61.6096	-2.13632	1.06742	-2.00138	0.0453518	0.36643
ENSG00000159176.9_CSRP1	7.66654	-1.31373	0.65701	-1.99957	0.0455471	0.366796
ENSG00000153179.7_RASSF3	192.179	-1.6715	0.836054	-1.99928	0.0455782	0.366796
ENSG00000103995.9_CEP152	6.71221	1.2938	0.647218	1.99901	0.0456068	0.366796
ENSG00000138297.9_TIMM23	141.996	-0.94917	0.47454	-2.00019	0.04548	0.366796
ENSG00000076513.12_ANKRD13A	57.6895	-1.47677	0.738472	-1.99976	0.0455259	0.366796
ENSG00000143740.10_SNAP47	82.8807	2.47699	1.23887	1.9994	0.0455653	0.366796
ENSG00000142556.14_ZNF614	3.7778	-2.05008	1.02608	-1.99798	0.0457193	0.367213
ENSG00000184056.10_VPS33B	11.587	1.34102	0.671179	1.998	0.0457162	0.367213
ENSG00000116957.8_TBCE	2.53479	-4.87069	2.43962	-1.99649	0.0458803	0.367529
ENSG00000230528.3_NOS2P3	2.85786	-1.58359	0.793164	-1.99655	0.0458738	0.367529
ENSG00000126953.5_TIMM8A	9.70989	-2.18523	1.09418	-1.99715	0.0458088	0.367529
ENSG00000078804.8_TP53INP2	11.9508	1.94227	0.972627	1.99693	0.0458326	0.367529
ENSG00000204428.8_LY6G5C	9.99516	-0.888779	0.44527	-1.99605	0.045929	0.367675
ENSG00000059377.11_TBXAS1	11.8516	-1.71815	0.861385	-1.99463	0.046083	0.368
ENSG00000104228.8_TRIM35	9.10713	-2.79477	1.40179	-1.99372	0.0461827	0.368
ENSG00000236943.2_RP11-640M9.1	12.8497	-1.658	0.831255	-1.99458	0.0460891	0.368
ENSG00000129696.8_TTI2	13.4	1.34696	0.675545	1.99388	0.0461648	0.368
ENSG00000130254.7_SAFB2	135.97	-0.754363	0.378327	-1.99395	0.0461578	0.368
ENSG00000130340.10_SNX9	96.7444	1.2206	0.612131	1.99402	0.0461502	0.368
ENSG00000213639.5_PPP1CB	1541.87	-0.928116	0.465486	-1.99386	0.046167	0.368
ENSG00000087460.19_GNAS	527.173	0.408661	0.205065	1.99284	0.0462791	0.368525
ENSG00000171617.9_ENC1	24.2113	-2.16977	1.08929	-1.99192	0.0463803	0.369088
ENSG00000167555.9_ZNF528	10.4352	-1.46033	0.733413	-1.99114	0.0464652	0.369519
ENSG00000135457.5_TFCP2	4.23876	-5.62782	2.82718	-1.99061	0.0465236	0.369519
ENSG00000107938.13_C10orf137	21.0559	1.38828	0.697423	1.99059	0.0465262	0.369519
ENSG00000143603.14_KCNN3	3.64245	-1.11592	0.560794	-1.98989	0.0466029	0.369681
ENSG00000008517.12_IL32	350.519	0.984537	0.494918	1.98929	0.0466689	0.369681
ENSG00000127080.5_IPPK	6.09945	2.77544	1.39503	1.98953	0.0466429	0.369681
ENSG00000058453.12_CROCC	3.6535	-1.2081	0.607292	-1.98932	0.0466654	0.369681
ENSG00000176142.8_TMEM39A	15.0825	-2.25264	1.1332	-1.98786	0.046827	0.370206
ENSG00000160563.9_MED27	17.8212	3.20203	1.61038	1.98837	0.0467708	0.370206
ENSG00000163406.6_SLC15A2	10.0971	-1.40335	0.705865	-1.98813	0.0467978	0.370206
ENSG00000139531.8_SUOX	23.2268	0.883127	0.444682	1.98597	0.0470364	0.371164
ENSG00000168970.16_JMJD7-PLA2G4B	8.90751	1.11657	0.562315	1.98566	0.047071	0.371164
ENSG00000107862.4_GBF1	6.80299	2.80359	1.41183	1.98579	0.047057	0.371164
ENSG00000196510.8_ANAPC7	13.9593	1.50153	0.755977	1.98621	0.0470104	0.371164
ENSG00000165533.14_TTC8	5.16492	1.49733	0.754593	1.98429	0.0472232	0.371327
ENSG00000152582.8_SPEF2	5.27673	1.45659	0.733793	1.98502	0.0471423	0.371327
ENSG00000025708.8_TYMP	402.505	1.70359	0.858624	1.9841	0.0472452	0.371327
ENSG00000239282.3_GATSL3	2.84183	-4.89343	2.46552	-1.98474	0.0471731	0.371327
ENSG00000197903.6_HIST1H2BK	46.3125	-2.5067	1.26316	-1.98448	0.0472028	0.371327
ENSG00000164219.5_PGGT1B	159.55	-1.42543	0.718545	-1.98377	0.0472815	0.37137
ENSG00000204469.8_PRRC2A	13.5638	-0.830074	0.41871	-1.98246	0.0474281	0.372279
ENSG00000102144.9_PGK1	363.901	0.975582	0.492309	1.98165	0.0475188	0.372508
ENSG00000115138.6_POMC	5.452	4.00596	2.02143	1.98175	0.0475076	0.372508
ENSG00000158373.7_HIST1H2BD	19.8004	-2.23348	1.12795	-1.98012	0.0476901	0.373469
ENSG00000240907.1_BX255923.3	2.73012	1.42204	0.718199	1.98	0.0477031	0.373469
ENSG00000130529.11_TRPM4	20.5828	-1.22533	0.619268	-1.97867	0.0478529	0.374399
ENSG00000165288.10_BRWD3	2.52118	-3.10268	1.569	-1.97749	0.0479863	0.375125
ENSG00000124935.3_SCGB1D2	3.00131	-4.9786	2.51788	-1.9773	0.0480078	0.375125
ENSG00000117481.6_NSUN4	11.9446	-1.07794	0.545305	-1.97677	0.0480675	0.375349
ENSG00000106789.8_CORO2A	22.8202	-1.07279	0.543433	-1.9741	0.0483704	0.377049
ENSG00000198925.6_ATG9A	2.8488	-3.69431	1.87146	-1.97403	0.0483788	0.377049
ENSG00000120800.4_UTP20	5.90854	-1.78966	0.906481	-1.9743	0.0483479	0.377049
ENSG00000257704.2_PRR24	7.52986	4.45751	2.25943	1.97284	0.0485133	0.377703
ENSG00000169252.4_ADRB2	4.19344	3.89177	1.97277	1.97274	0.0485252	0.377703
ENSG00000145012.8_LPP	42.4115	-1.07628	0.545727	-1.97219	0.0485878	0.377947
ENSG00000266753.2_RP11-690G19.3	4.53804	-1.78996	0.908054	-1.9712	0.0487008	0.378582
ENSG00000132382.10_MYBBP1A	20.0037	-2.0834	1.0578	-1.96956	0.0488885	0.378586
ENSG00000115761.11_NOL10	14.9364	-2.52568	1.28236	-1.96956	0.0488892	0.378586
ENSG00000126882.8_FAM78A	7.5681	2.05077	1.04055	1.97086	0.0487399	0.378586
ENSG00000120071.8_KANSL1	29.9396	1.83286	0.930536	1.96968	0.0488746	0.378586
ENSG00000270820.1_RP11-355B11.2	3.15108	1.75711	0.891844	1.9702	0.0488155	0.378586
ENSG00000265784.1_RP1-56K13.3	87.3062	2.22293	1.12821	1.97032	0.0488012	0.378586
ENSG00000142627.9_EPHA2	11.5737	-2.93514	1.49279	-1.96621	0.0492741	0.379138
ENSG00000147889.12_CDKN2A	18.274	-2.21322	1.12532	-1.96674	0.0492132	0.379138
ENSG00000255594.1_Z82188.1	122.012	1.87281	0.951917	1.96741	0.049136	0.379138
ENSG00000225839.2_TRMT2B-AS1	2.89317	1.64875	0.838383	1.96658	0.0492318	0.379138
ENSG00000119673.10_ACOT2	4.38129	2.69322	1.36856	1.96793	0.0490763	0.379138
ENSG00000163468.10_CCT3	62.606	-1.26143	0.641198	-1.96729	0.0491494	0.379138
ENSG00000100422.9_CERK	10.4545	-1.75782	0.893897	-1.96646	0.0492451	0.379138
ENSG00000126262.4_FFAR2	2.72782	1.46667	0.745502	1.96736	0.0491415	0.379138
ENSG00000090554.8_FLT3LG	39.2828	-0.973568	0.495102	-1.9664	0.0492527	0.379138
ENSG00000272933.1_RP11-47A8.5	17.1512	2.64858	1.34666	1.96678	0.0492083	0.379138
ENSG00000102543.10_CDADC1	3.84885	3.80759	1.9368	1.96592	0.0493077	0.379155
ENSG00000118707.5_TGIF2	3.10974	-1.6775	0.854386	-1.9634	0.0495995	0.381043
ENSG00000111300.5_NAA25	66.2977	-1.04153	0.530512	-1.96326	0.0496163	0.381043
ENSG00000157992.8_KRTCAP3	2.58603	-3.8799	1.9776	-1.96193	0.0497708	0.381987
ENSG00000223704.1_RP1-90L6.2	6.56338	-1.53187	0.781566	-1.96	0.0499963	0.383034
ENSG00000168395.10_ING5	6.38783	-0.976389	0.498172	-1.95994	0.0500022	0.383034
ENSG00000164252.8_AGGF1	5.75068	-3.63874	1.85649	-1.96001	0.0499947	0.383034
ENSG00000144182.12_LIPT1	31.5142	1.12587	0.574694	1.95908	0.0501031	0.38319
ENSG00000266223.1_RN7SL84P	22.2238	0.620925	0.316967	1.95896	0.0501177	0.38319
ENSG00000075426.7_FOSL2	371.842	-1.19134	0.608083	-1.95916	0.0500935	0.38319
ENSG00000188322.4_SBK1	4.98107	-1.89547	0.967818	-1.95849	0.050172	0.383362
ENSG00000174276.5_ZNHIT2	4.91368	-5.68726	2.90483	-1.95786	0.0502459	0.383685
ENSG00000254307.2_KB-1608C10.2	2.69951	-1.49915	0.766025	-1.95705	0.0503413	0.38417
ENSG00000272317.1_AL162424.2	3.60337	-1.63787	0.837031	-1.95677	0.0503749	0.384184
ENSG00000172602.5_RND1	17.0539	-1.2018	0.615386	-1.95293	0.0508283	0.385268
ENSG00000139116.13_KIF21A	7.26937	2.31839	1.18578	1.95517	0.0505636	0.385268
ENSG00000111846.11_GCNT2	10.0784	-0.952941	0.487958	-1.95291	0.0508297	0.385268
ENSG00000177042.10_TMEM80	13.7445	-1.40189	0.717514	-1.95381	0.0507238	0.385268
ENSG00000118217.5_ATF6	5.25263	-3.28191	1.67904	-1.95464	0.050626	0.385268
ENSG00000105323.12_HNRNPUL1	154.821	-0.664208	0.340082	-1.95308	0.0508096	0.385268
ENSG00000135678.7_CPM	31.9356	-0.860175	0.440189	-1.9541	0.0506893	0.385268
ENSG00000162664.12_ZNF326	112.041	-1.32972	0.68029	-1.95463	0.0506264	0.385268
ENSG00000108587.10_GOSR1	73.5238	-0.675834	0.345988	-1.95334	0.050779	0.385268
ENSG00000091137.7_SLC26A4	6.7268	-1.27457	0.652666	-1.95286	0.0508357	0.385268
ENSG00000171302.12_CANT1	3.31912	-2.81125	1.43977	-1.95258	0.0508699	0.385285
ENSG00000164062.8_APEH	11.7909	-2.64095	1.35301	-1.9519	0.0509497	0.385357
ENSG00000110911.10_SLC11A2	18.4403	-0.9275	0.475229	-1.95169	0.050975	0.385357
ENSG00000167693.12_NXN	6.25679	-1.67643	0.858943	-1.95173	0.05097	0.385357
ENSG00000143319.12_ISG20L2	58.7465	-1.06256	0.544555	-1.95125	0.0510274	0.38537
ENSG00000184293.3_CLECL1	4.53579	5.628	2.88447	1.95114	0.0510405	0.38537
ENSG00000111790.9_FGFR1OP2	40.0855	1.53755	0.788317	1.95042	0.0511255	0.385531
ENSG00000133246.7_PRAM1	3.25734	1.24085	0.636158	1.95053	0.0511126	0.385531
ENSG00000159445.8_THEM4	12.8328	-1.21182	0.621513	-1.94979	0.0512017	0.385864
ENSG00000184517.7_ZFP1	4.11449	-5.58316	2.86477	-1.9489	0.0513074	0.385921
ENSG00000247572.3_CKMT2-AS1	12.0064	-0.864069	0.443526	-1.94818	0.0513934	0.385921
ENSG00000119650.8_IFT43	26.0766	-3.32053	1.70356	-1.94917	0.0512747	0.385921
ENSG00000151650.7_VENTX	3.69642	-0.962171	0.493898	-1.94812	0.0514008	0.385921
ENSG00000054523.12_KIF1B	21.4129	-1.05526	0.541579	-1.9485	0.0513557	0.385921
ENSG00000072195.10_SPEG	4.20129	-1.24339	0.638102	-1.94858	0.0513457	0.385921
ENSG00000204410.10_MSH5	53.3307	-0.674275	0.346485	-1.94605	0.0516493	0.387546
ENSG00000156052.6_GNAQ	14.8044	-3.78455	1.94663	-1.94416	0.0518765	0.388479
ENSG00000167995.11_BEST1	23.5535	-1.18578	0.609989	-1.94394	0.0519022	0.388479
ENSG00000053372.4_MRTO4	16.4776	-1.34218	0.690391	-1.94408	0.0518855	0.388479
ENSG00000100219.12_XBP1	345.843	-1.45368	0.74776	-1.94405	0.0518896	0.388479
ENSG00000183049.8_CAMK1D	23.1115	-1.12326	0.578074	-1.9431	0.0520041	0.389001
ENSG00000137075.13_RNF38	10.4422	2.84223	1.463	1.94274	0.0520475	0.389085
ENSG00000197429.6_IPP	2.80197	-2.04924	1.05532	-1.94182	0.0521595	0.389681
ENSG00000185019.12_UBOX5	25.8778	-1.6483	0.849657	-1.93996	0.0523841	0.3909
ENSG00000258405.5_ZNF578	2.72618	-2.37769	1.22578	-1.93974	0.0524118	0.3909
ENSG00000083454.17_P2RX5	2.92576	-2.04491	1.05425	-1.93967	0.0524197	0.3909
ENSG00000143624.9_INTS3	16.3535	-1.19961	0.618584	-1.93928	0.0524669	0.391011
ENSG00000175334.3_BANF1	23.2851	-1.81099	0.934197	-1.93855	0.0525564	0.391437
ENSG00000158270.10_COLEC12	17.002	-1.10731	0.571364	-1.93801	0.0526226	0.391688
ENSG00000126856.9_PRDM7	6.10973	-1.49998	0.77433	-1.93714	0.0527283	0.392234
ENSG00000109089.7_CDR2L	4.17647	-3.36869	1.73985	-1.9362	0.0528438	0.392851
ENSG00000267416.1_CTD-2319I12.2	11.5612	0.862676	0.445645	1.93579	0.0528931	0.392976
ENSG00000171621.9_SPSB1	3.77261	-3.71026	1.91866	-1.93377	0.0531408	0.393244
ENSG00000103707.5_MTFMT	78.0267	-1.16979	0.604966	-1.93365	0.0531563	0.393244
ENSG00000139675.10_HNRNPA1L2	5.29084	-1.72495	0.891379	-1.93514	0.0529727	0.393244
ENSG00000213923.6_CSNK1E	23.6001	-1.32671	0.68594	-1.93415	0.0530941	0.393244
ENSG00000236986.2_RP11-544A12.4	3.82273	-1.57943	0.816609	-1.93413	0.0530973	0.393244
ENSG00000233892.1_PAIP1P1	2.60944	-4.76782	2.46589	-1.93351	0.0531734	0.393244
ENSG00000163900.6_TMEM41A	76.032	-1.23666	0.639639	-1.93338	0.0531895	0.393244
ENSG00000142197.8_DOPEY2	12.6341	1.08791	0.562579	1.93378	0.05314	0.393244
ENSG00000230937.5_MIR205HG	2.7235	-1.62941	0.843017	-1.93283	0.0532567	0.393398
ENSG00000177830.13_CHID1	10.0524	-1.69521	0.87713	-1.93268	0.0532754	0.393398
ENSG00000187147.13_RNF220	35.942	0.874703	0.452859	1.93151	0.0534195	0.393927
ENSG00000003402.15_CFLAR	340.276	0.495983	0.257155	1.92873	0.0537645	0.393927
ENSG00000105366.11_SIGLEC8	5.17863	1.43553	0.743878	1.9298	0.0536321	0.393927
ENSG00000033030.9_ZCCHC8	25.552	1.42091	0.736912	1.92819	0.0538313	0.393927
ENSG00000112655.11_PTK7	4.94668	-0.982892	0.509116	-1.93058	0.0535346	0.393927
ENSG00000113552.11_GNPDA1	8.26507	-3.72457	1.93084	-1.92899	0.0537321	0.393927
ENSG00000124571.13_XPO5	15.952	-1.20068	0.622341	-1.9293	0.0536933	0.393927
ENSG00000143079.10_CTTNBP2NL	2.51163	-1.65292	0.856047	-1.93088	0.0534981	0.393927
ENSG00000026559.9_KCNG1	4.74799	-1.21502	0.628989	-1.93171	0.0533957	0.393927
ENSG00000137221.10_TJAP1	6.63857	-1.71138	0.886552	-1.93037	0.0535608	0.393927
ENSG00000213625.4_LEPROT	67.5884	-1.41127	0.731347	-1.92969	0.0536458	0.393927
ENSG00000113597.13_TRAPPC13	18.1499	1.92621	0.997479	1.93108	0.0534729	0.393927
ENSG00000100092.16_SH3BP1	5.44379	2.09241	1.08519	1.92816	0.0538358	0.393927
ENSG00000177666.11_PNPLA2	9.97651	-2.33582	1.21133	-1.92831	0.0538163	0.393927
ENSG00000188486.3_H2AFX	10.9438	2.45161	1.27135	1.92835	0.0538111	0.393927
ENSG00000151746.9_BICD1	2.4959	-4.70185	2.43916	-1.92765	0.0538983	0.394015
ENSG00000074319.8_TSG101	84.95	-1.83605	0.952538	-1.92753	0.0539131	0.394015
ENSG00000198301.7_SDAD1	9.17487	-2.97549	1.54405	-1.92707	0.0539706	0.394198
ENSG00000228422.3_LINC00687	4.32547	-2.56502	1.33128	-1.92674	0.0540119	0.394261
ENSG00000142002.12_DPP9	22.5084	1.31416	0.682522	1.92545	0.0541729	0.395197
ENSG00000017260.15_ATP2C1	38.4697	-1.94541	1.01061	-1.92498	0.0542314	0.395385
ENSG00000196126.6_HLA-DRB1	418.005	1.09085	0.56697	1.924	0.054355	0.395563
ENSG00000139624.8_CERS5	97.3687	0.439085	0.228249	1.92371	0.0543908	0.395563
ENSG00000117010.11_ZNF684	17.3326	-1.08487	0.56399	-1.92357	0.0544083	0.395563
ENSG00000134852.10_CLOCK	4.14264	-4.51079	2.34511	-1.92348	0.0544194	0.395563
ENSG00000122786.15_CALD1	12.0817	-3.04687	1.58348	-1.92416	0.0543339	0.395563
ENSG00000131686.10_CA6	6.2764	-1.32543	0.689458	-1.92242	0.0545532	0.396298
ENSG00000103550.9_KNOP1	45.4245	-2.12344	1.10557	-1.92067	0.0547729	0.396496
ENSG00000159166.9_LAD1	3.59833	-5.39004	2.80676	-1.92038	0.0548102	0.396496
ENSG00000143549.15_TPM3	509.711	0.579681	0.301824	1.92059	0.0547829	0.396496
ENSG00000237499.2_RP11-356I2.4	11.6497	1.76773	0.919825	1.92181	0.05463	0.396496
ENSG00000243008.2_RP11-556N21.1	5.56273	-1.31131	0.682821	-1.92043	0.0548033	0.396496
ENSG00000181690.3_PLAG1	3.77443	-5.45958	2.84145	-1.9214	0.0546808	0.396496
ENSG00000160051.7_IQCC	5.66604	-1.19749	0.62321	-1.92148	0.0546711	0.396496
ENSG00000145817.12_YIPF5	97.0694	1.30579	0.680085	1.92004	0.0548524	0.396564
ENSG00000007202.10_KIAA0100	4.88441	-2.13927	1.11462	-1.91928	0.054949	0.397026
ENSG00000115339.9_GALNT3	5.18103	-4.21017	2.19431	-1.91868	0.0550249	0.397336
ENSG00000148737.11_TCF7L2	3.44035	-3.2663	1.70327	-1.91767	0.0551532	0.398025
ENSG00000113448.12_PDE4D	322.539	0.981142	0.511743	1.91726	0.0552053	0.398163
ENSG00000128989.6_ARPP19	107.668	1.09187	0.56982	1.91617	0.0553436	0.398685
ENSG00000128872.5_TMOD2	4.2626	1.15136	0.600783	1.91643	0.0553107	0.398685
ENSG00000161202.13_DVL3	9.54238	-1.53747	0.802822	-1.91508	0.0554823	0.399299
ENSG00000213658.6_LAT	100.823	0.824656	0.430702	1.91468	0.0555336	0.399299
ENSG00000264198.1_RP11-94L15.2	164.029	0.921448	0.481205	1.91488	0.0555084	0.399299
ENSG00000121542.7_SEC22A	17.4508	-1.13304	0.591833	-1.91446	0.0555609	0.399299
ENSG00000077549.13_CAPZB	164.783	0.989009	0.516897	1.91336	0.0557021	0.399601
ENSG00000137267.5_TUBB2A	24.5095	-2.84832	1.48849	-1.91356	0.0556766	0.399601
ENSG00000229164.5_TRAC	583.749	1.099	0.574377	1.91338	0.0556994	0.399601
ENSG00000147854.12_UHRF2	63.5374	1.21451	0.635023	1.91254	0.0558073	0.400118
ENSG00000115207.9_GTF3C2	21.8346	1.60831	0.841141	1.91205	0.0558692	0.400325
ENSG00000173451.2_THAP2	3.64925	-2.17502	1.13846	-1.91049	0.0560704	0.401528
ENSG00000122884.8_P4HA1	9.88561	1.73416	0.907944	1.90998	0.0561355	0.401756
ENSG00000151491.8_EPS8	6.0176	-1.43782	0.753019	-1.9094	0.0562101	0.401862
ENSG00000163032.7_VSNL1	10.4474	-1.42536	0.746514	-1.90935	0.0562168	0.401862
ENSG00000187736.8_NHEJ1	3.30207	-2.85388	1.49507	-1.90886	0.0562803	0.402078
ENSG00000146376.6_ARHGAP18	17.1963	-2.70095	1.41543	-1.90821	0.0563636	0.402198
ENSG00000140832.5_MARVELD3	18.8309	0.976744	0.511857	1.90823	0.0563609	0.402198
ENSG00000169660.11_HEXDC	12.0289	-2.53751	1.33122	-1.90615	0.0566305	0.403864
ENSG00000185414.15_MRPL30	24.1711	1.47717	0.775085	1.90582	0.0566737	0.403934
ENSG00000162434.7_JAK1	284.444	1.12582	0.590811	1.90555	0.0567083	0.403942
ENSG00000128849.9_CGNL1	4.60876	1.37526	0.722208	1.90424	0.0568786	0.404917
ENSG00000258551.1_RP11-661P17.1	10.1055	-1.06718	0.560776	-1.90304	0.0570353	0.405793
ENSG00000241146.1_RPL7P41	4.87639	-0.86654	0.455567	-1.90212	0.0571561	0.406413
ENSG00000172059.6_KLF11	5.12759	-3.09287	1.62787	-1.89995	0.0574397	0.406886
ENSG00000185339.4_TCN2	10.3099	-3.55617	1.8704	-1.90129	0.0572637	0.406886
ENSG00000253982.1_CTD-2336O2.1	6.10361	1.65831	0.872883	1.89981	0.0574581	0.406886
ENSG00000165490.8_C11orf82	2.57636	1.57271	0.827465	1.90063	0.05735	0.406886
ENSG00000173705.4_SUSD5	5.32944	-1.69972	0.894534	-1.90011	0.0574184	0.406886
ENSG00000119041.6_GTF3C3	5.82695	-2.26048	1.18915	-1.90092	0.0573131	0.406886
ENSG00000246394.3_RP11-386I8.6	6.69068	1.09506	0.576186	1.90053	0.057363	0.406886
ENSG00000186141.4_POLR3C	14.9412	-1.82317	0.960215	-1.89871	0.0576022	0.406927
ENSG00000124444.11_ZNF576	10.57	-1.32572	0.698176	-1.89884	0.057586	0.406927
ENSG00000196083.5_IL1RAP	9.58569	-1.59472	0.839994	-1.89848	0.0576323	0.406927
ENSG00000204644.5_ZFP57	3.48197	4.82467	2.54126	1.89853	0.0576257	0.406927
ENSG00000160570.9_DEDD2	33.6254	-1.72507	0.908374	-1.89907	0.0575549	0.406927
ENSG00000132879.9_FBXO44	20.06	1.64743	0.868241	1.89744	0.0577699	0.407661
ENSG00000247092.2_SNHG10	3.42461	-2.79895	1.47554	-1.89689	0.0578418	0.407692
ENSG00000004399.8_PLXND1	3.99995	3.2134	1.69401	1.89691	0.0578392	0.407692
ENSG00000204397.3_CARD16	194.383	1.5025	0.792413	1.8961	0.0579465	0.408192
ENSG00000127337.2_YEATS4	8.42973	2.96041	1.56212	1.89512	0.058076	0.408866
ENSG00000129292.16_PHF20L1	19.8334	0.867268	0.457799	1.89443	0.058168	0.409275
ENSG00000227781.4_GLUD1P2	5.69573	-1.55186	0.819485	-1.8937	0.0582642	0.409475
ENSG00000138382.9_METTL5	68.0067	1.44755	0.764379	1.89376	0.0582572	0.409475
ENSG00000177427.8_MIEF2	4.60673	-1.46791	0.775299	-1.89335	0.0583119	0.409573
ENSG00000177030.12_DEAF1	18.5464	-1.99771	1.05571	-1.89229	0.0584522	0.410193
ENSG00000114450.5_GNB4	5.57009	1.13753	0.601422	1.89141	0.0585699	0.410193
ENSG00000229474.2_PATL2	17.479	2.11967	1.12042	1.89185	0.0585114	0.410193
ENSG00000079691.15_LRRC16A	22.8301	-2.92366	1.54549	-1.89174	0.0585262	0.410193
ENSG00000064687.8_ABCA7	5.01561	2.54787	1.34703	1.89147	0.0585611	0.410193
ENSG00000215126.6_CBWD7	24.2199	-1.21451	0.642379	-1.89065	0.0586715	0.410429
ENSG00000164091.7_WDR82	19.2282	-1.52731	0.807783	-1.89074	0.0586588	0.410429
ENSG00000164483.12_SAMD3	11.934	2.29574	1.21445	1.89035	0.0587107	0.410465
ENSG00000163812.9_ZDHHC3	11.6745	-2.97139	1.5724	-1.88971	0.0587961	0.410481
ENSG00000113971.14_NPHP3	21.9636	-0.96905	0.512746	-1.88992	0.0587686	0.410481
ENSG00000105792.15_C7orf63	7.54808	-0.943379	0.499255	-1.88957	0.0588148	0.410481
ENSG00000111860.9_CEP85L	33.0806	2.60081	1.37678	1.88906	0.0588844	0.41073
ENSG00000203896.5_LIME1	26.7041	1.98857	1.05325	1.88804	0.0590206	0.411285
ENSG00000181035.9_SLC25A42	34.5231	-1.1382	0.602873	-1.88795	0.059032	0.411285
ENSG00000105426.10_PTPRS	10.0177	-1.74784	0.92613	-1.88725	0.0591266	0.411706
ENSG00000263904.1_RP11-344B2.3	18.1159	0.989175	0.524232	1.8869	0.0591735	0.411796
ENSG00000240373.1_SEC62-AS1	5.7979	-1.168	0.619276	-1.88607	0.059286	0.411888
ENSG00000142541.12_RPL13A	1145.77	-0.503506	0.267066	-1.88533	0.0593858	0.411888
ENSG00000239642.1_AC034228.7	3.99123	-1.99506	1.05785	-1.88596	0.0593008	0.411888
ENSG00000126749.10_EMG1	34.8546	-1.7351	0.920463	-1.88503	0.0594252	0.411888
ENSG00000125968.7_ID1	33.2932	-2.99452	1.58848	-1.88515	0.0594096	0.411888
ENSG00000115468.7_EFHD1	3.9773	-1.81231	0.961121	-1.88562	0.0593456	0.411888
ENSG00000068394.9_GPKOW	10.0742	-3.33926	1.77144	-1.88505	0.0594232	0.411888
ENSG00000198087.7_CD2AP	19.6698	-2.01598	1.06962	-1.88475	0.059463	0.411913
ENSG00000223705.5_NSUN5P1	11.7927	-1.5297	0.811952	-1.88398	0.0595676	0.412096
ENSG00000261801.1_LOXL1-AS1	28.4422	-1.01874	0.540859	-1.88355	0.0596257	0.412096
ENSG00000144481.12_TRPM8	2.72775	-1.42947	0.758865	-1.8837	0.0596059	0.412096
ENSG00000120889.8_TNFRSF10B	8.18372	-1.68786	0.895955	-1.88387	0.0595823	0.412096
ENSG00000257337.2_RP11-983P16.4	14.936	-1.15132	0.611478	-1.88286	0.0597199	0.412385
ENSG00000213722.4_DDAH2	34.3785	-2.79193	1.48311	-1.88249	0.0597698	0.412385
ENSG00000242687.2_AC004893.11	7.42069	-0.907585	0.482067	-1.8827	0.0597417	0.412385
ENSG00000179119.10_SPTY2D1	56.8699	1.48222	0.787595	1.88196	0.059842	0.412445
ENSG00000106683.10_LIMK1	15.6487	-0.735544	0.390894	-1.88169	0.0598775	0.412445
ENSG00000048392.7_RRM2B	3.98894	-1.68852	0.897354	-1.88167	0.0598809	0.412445
ENSG00000249700.4_SRD5A3-AS1	17.4841	0.735119	0.390961	1.88029	0.0600687	0.413503
ENSG00000160752.10_FDPS	74.3668	1.40305	0.746531	1.87943	0.0601863	0.413508
ENSG00000233559.1_AC016831.7	14.398	-0.94705	0.503943	-1.87928	0.0602064	0.413508
ENSG00000115750.12_TAF1B	3.60777	1.30088	0.692005	1.87988	0.0601247	0.413508
ENSG00000176715.11_ACSF3	36.2207	-1.0568	0.562305	-1.8794	0.0601895	0.413508
ENSG00000139793.14_MBNL2	2.52092	-4.57002	2.43498	-1.87682	0.0605422	0.413765
ENSG00000149923.9_PPP4C	128.268	0.919129	0.489656	1.87709	0.0605057	0.413765
ENSG00000102265.7_TIMP1	111.794	-2.47194	1.31623	-1.87805	0.0603748	0.413765
ENSG00000197747.4_S100A10	206.865	-1.13186	0.602881	-1.87741	0.0604616	0.413765
ENSG00000179136.2_LINC00670	5.50043	1.13688	0.605331	1.87811	0.0603668	0.413765
ENSG00000118523.5_CTGF	98.4004	-2.89639	1.54322	-1.87684	0.0605394	0.413765
ENSG00000166821.4_PEX11A	6.17584	-1.28541	0.685185	-1.87601	0.0606545	0.413765
ENSG00000271643.1_RP11-10C24.3	4.31076	1.83322	0.976881	1.8766	0.0605725	0.413765
ENSG00000083123.10_BCKDHB	7.86802	-1.46055	0.777811	-1.87777	0.0604124	0.413765
ENSG00000113013.8_HSPA9	159.751	1.09257	0.58229	1.87633	0.0606105	0.413765
ENSG00000089195.10_TRMT6	22.2499	-2.49645	1.33055	-1.87625	0.060621	0.413765
ENSG00000147010.13_SH3KBP1	215.121	1.11077	0.59205	1.87614	0.0606356	0.413765
ENSG00000165802.15_NSMF	2.96582	2.75665	1.46987	1.87545	0.0607314	0.414056
ENSG00000227184.3_EPPK1	7.69118	-2.8853	1.53974	-1.87389	0.0609452	0.415045
ENSG00000073350.9_LLGL2	17.0653	1.71689	0.916107	1.87412	0.0609145	0.415045
ENSG00000243449.2_C4orf48	210.272	1.72935	0.923317	1.87298	0.0610714	0.415296
ENSG00000101310.10_SEC23B	28.5168	-2.35931	1.25973	-1.87288	0.0610851	0.415296
ENSG00000104695.8_PPP2CB	7.08048	1.27054	0.678252	1.87325	0.0610334	0.415296
ENSG00000154040.16_CABYR	6.25312	1.26684	0.676592	1.87239	0.0611524	0.415418
ENSG00000173917.9_HOXB2	7.26439	2.88472	1.54078	1.87225	0.0611717	0.415418
ENSG00000183426.11_NPIPA1	31.6311	1.13986	0.60903	1.8716	0.0612621	0.415798
ENSG00000258643.1_BCL2L2-PABPN1	3.54142	-4.70927	2.51694	-1.87103	0.0613411	0.416101
ENSG00000106560.6_GIMAP2	30.3961	0.815851	0.436245	1.87017	0.0614604	0.4164
ENSG00000064115.6_TM7SF3	20.7822	1.30676	0.698812	1.86997	0.0614886	0.4164
ENSG00000135002.7_RFK	19.1742	1.36017	0.727329	1.87009	0.0614718	0.4164
ENSG00000127993.10_RBM48	40.3264	1.4616	0.782528	1.86779	0.0617917	0.416445
ENSG00000039987.2_BEST2	4.3851	-1.33703	0.715694	-1.86815	0.0617406	0.416445
ENSG00000168899.4_VAMP5	108.285	2.13727	1.14377	1.86862	0.0616756	0.416445
ENSG00000266754.1_RN7SL524P	112.982	-0.614453	0.328974	-1.86779	0.0617917	0.416445
ENSG00000138111.10_TMEM180	29.7252	-0.906413	0.485214	-1.86807	0.0617526	0.416445
ENSG00000128000.11_ZNF780B	10.4783	-1.41093	0.75544	-1.86769	0.0618053	0.416445
ENSG00000128739.16_SNRPN	78.3153	1.50271	0.804201	1.86857	0.0616823	0.416445
ENSG00000174456.9_C12orf76	37.2385	-0.745652	0.399164	-1.86803	0.0617576	0.416445
ENSG00000141367.7_CLTC	27.9219	-1.48032	0.792201	-1.86861	0.0616769	0.416445
ENSG00000107672.10_NSMCE4A	15.6962	1.93562	1.03659	1.86729	0.0618611	0.416589
ENSG00000162390.13_ACOT11	20.8837	-0.628067	0.336457	-1.86671	0.0619421	0.416724
ENSG00000135116.5_HRK	29.2186	-1.221	0.65411	-1.86665	0.0619501	0.416724
ENSG00000159713.6_TPPP3	3.75725	-5.45371	2.92374	-1.86532	0.0621366	0.417746
ENSG00000178950.12_GAK	80.284	1.46658	0.786573	1.86452	0.0622493	0.418039
ENSG00000160613.8_PCSK7	213.192	-0.732125	0.392658	-1.86454	0.0622464	0.418039
ENSG00000270081.1_RP5-935K16.1	31.7198	1.24674	0.668923	1.8638	0.0623503	0.418258
ENSG00000135476.7_ESPL1	8.63674	1.38305	0.742359	1.86305	0.062455	0.418258
ENSG00000269984.1_RP11-362K14.5	11.2683	-1.01688	0.545696	-1.86346	0.0623972	0.418258
ENSG00000265618.1_CTB-96E2.7	6.74064	1.26375	0.678093	1.86368	0.0623661	0.418258
ENSG00000139636.11_LMBR1L	4.62717	1.62126	0.870107	1.86328	0.0624225	0.418258
ENSG00000233075.1_AL023583.1	11.3553	-1.05844	0.568489	-1.86185	0.0626241	0.419158
ENSG00000072786.8_STK10	75.4376	0.791216	0.425072	1.86137	0.0626919	0.41938
ENSG00000184060.6_ADAP2	6.19938	-2.86084	1.53733	-1.86091	0.0627565	0.419409
ENSG00000189366.5_ALG1L	3.7249	-5.44068	2.92376	-1.86085	0.0627657	0.419409
ENSG00000264523.1_RP11-158I9.7	40.7924	-0.568321	0.30551	-1.86024	0.0628523	0.419756
ENSG00000168092.9_PAFAH1B2	306.132	-0.894223	0.480878	-1.85956	0.0629476	0.420161
ENSG00000166920.6_C15orf48	94.2958	-2.25388	1.21231	-1.85916	0.0630043	0.420307
ENSG00000005007.8_UPF1	12.5852	2.08546	1.12202	1.85867	0.0630736	0.420537
ENSG00000115459.13_ELMOD3	89.1325	-0.917335	0.493788	-1.85775	0.0632045	0.421177
ENSG00000159202.13_UBE2Z	28.9323	2.76787	1.49044	1.85708	0.0632994	0.421224
ENSG00000118412.8_CASP8AP2	4.53404	-1.02147	0.550085	-1.85692	0.0633221	0.421224
ENSG00000073803.9_MAP3K13	93.3499	-1.30546	0.702848	-1.85738	0.0632567	0.421224
ENSG00000168958.15_MFF	21.0107	-2.34045	1.26053	-1.85672	0.0633509	0.421224
ENSG00000115128.6_SF3B14	247.205	-1.37236	0.739667	-1.85538	0.0635424	0.421649
ENSG00000129680.11_MAP7D3	23.047	-1.49693	0.80695	-1.85505	0.0635892	0.421649
ENSG00000137124.6_ALDH1B1	54.9812	-1.47293	0.793717	-1.85573	0.0634913	0.421649
ENSG00000152894.10_PTPRK	5.12846	-1.679	0.904787	-1.85569	0.0634976	0.421649
ENSG00000164687.6_FABP5	242.882	0.864689	0.466111	1.85511	0.06358	0.421649
ENSG00000166387.7_PPFIBP2	6.71833	-3.87331	2.08872	-1.8544	0.0636825	0.421805
ENSG00000136636.8_KCTD3	4.54703	-1.19799	0.645998	-1.85447	0.0636714	0.421805
ENSG00000197046.7_SIGLEC15	3.79944	-1.59817	0.862103	-1.8538	0.0637676	0.422137
ENSG00000109111.10_SUPT6H	28.6664	1.22382	0.660498	1.85287	0.0639014	0.42256
ENSG00000142657.16_PGD	13.3086	3.55443	1.91826	1.85294	0.0638907	0.42256
ENSG00000157800.13_SLC37A3	56.1337	0.843761	0.455588	1.85203	0.0640217	0.423115
ENSG00000136720.6_HS6ST1	3.86028	-3.57089	1.92834	-1.85179	0.0640553	0.423115
ENSG00000176485.6_PLA2G16	113.049	0.985837	0.532751	1.85047	0.0642464	0.424146
ENSG00000173818.12_ENDOV	18.2162	1.20774	0.652904	1.84979	0.0643435	0.424554
ENSG00000132718.7_SYT11	8.59735	1.56354	0.84563	1.84896	0.0644632	0.425113
ENSG00000178222.8_RNF212	13.2096	-1.46964	0.795064	-1.84845	0.0645366	0.425364
ENSG00000102032.8_RENBP	20.691	0.699943	0.378766	1.84795	0.0646089	0.425377
ENSG00000151092.12_NGLY1	55.0513	1.29507	0.700764	1.84809	0.06459	0.425377
ENSG00000263934.2_SNORD3A	3.20918	-2.88349	1.56067	-1.8476	0.0646604	0.425484
ENSG00000110700.2_RPS13	499.998	-0.579176	0.313656	-1.84653	0.0648149	0.425867
ENSG00000150773.6_PIH1D2	3.26632	-2.62383	1.42096	-1.84652	0.0648172	0.425867
ENSG00000198846.5_TOX	17.6141	2.43536	1.31893	1.84647	0.0648243	0.425867
ENSG00000114735.5_HEMK1	4.69857	-1.33971	0.725754	-1.84596	0.0648979	0.425959
ENSG00000184194.5_GPR173	9.6254	-1.27392	0.690138	-1.84589	0.0649088	0.425959
ENSG00000162413.12_KLHL21	14.6384	-1.19408	0.647109	-1.84525	0.0650011	0.426334
ENSG00000132485.8_ZRANB2	75.9446	-1.54163	0.836335	-1.84331	0.0652834	0.426567
ENSG00000142173.10_COL6A2	3.27803	-2.82312	1.53101	-1.84396	0.0651888	0.426567
ENSG00000137857.13_DUOX1	13.7656	0.677875	0.367721	1.84345	0.0652631	0.426567
ENSG00000155657.19_TTN	70.9361	1.6079	0.872289	1.84331	0.0652836	0.426567
ENSG00000069702.6_TGFBR3	23.1937	-1.45354	0.788131	-1.84429	0.0651412	0.426567
ENSG00000134369.11_NAV1	18.3545	-1.00546	0.545211	-1.84416	0.0651597	0.426567
ENSG00000083799.13_CYLD	133.581	0.877574	0.475893	1.84406	0.0651749	0.426567
ENSG00000092531.5_SNAP23	13.0388	-1.42787	0.774828	-1.84282	0.0653546	0.4268
ENSG00000167700.4_MFSD3	3.59422	-5.38724	2.92386	-1.84251	0.0654008	0.426871
ENSG00000166441.8_RPL27A	710.592	-0.60225	0.326974	-1.84189	0.0654907	0.427218
ENSG00000165997.4_ARL5B	6.85008	-3.84742	2.08938	-1.84142	0.06556	0.427218
ENSG00000135604.9_STX11	54.3659	2.1785	1.18299	1.84153	0.0655441	0.427218
ENSG00000153002.7_CPB1	6.38303	-1.29805	0.705145	-1.84083	0.0656464	0.42732
ENSG00000117602.7_RCAN3	55.2846	-1.41355	0.767824	-1.84098	0.0656241	0.42732
ENSG00000143374.10_TARS2	26.3297	0.996264	0.541374	1.84025	0.0657315	0.427644
ENSG00000188021.7_UBQLN2	19.5673	2.61371	1.42113	1.83918	0.0658892	0.428381
ENSG00000120594.12_PLXDC2	23.1625	-1.39973	0.761136	-1.839	0.0659156	0.428381
ENSG00000008735.10_MAPK8IP2	2.7551	-1.51371	0.823412	-1.83834	0.0660125	0.428429
ENSG00000243150.1_RP11-538P18.2	11.8147	2.47748	1.34776	1.83822	0.0660293	0.428429
ENSG00000136111.8_TBC1D4	15.4177	2.41501	1.31355	1.83855	0.0659821	0.428429
ENSG00000137831.10_UACA	16.2184	-1.65057	0.898368	-1.8373	0.0661655	0.429082
ENSG00000114554.7_PLXNA1	3.15105	-5.19893	2.83037	-1.83684	0.0662334	0.429292
ENSG00000158201.5_ABHD3	14.2527	2.24104	1.22022	1.83659	0.0662707	0.429303
ENSG00000252010.1_SCARNA5	3.36527	5.36719	2.92347	1.8359	0.066373	0.429505
ENSG00000236287.3_ZBED5	13.3284	-1.25935	0.685958	-1.8359	0.0663722	0.429505
ENSG00000162496.4_DHRS3	189.695	-1.54678	0.84266	-1.83559	0.0664187	0.429571
ENSG00000125089.12_SH3TC1	3.57303	-2.92446	1.59437	-1.83424	0.0666179	0.430416
ENSG00000230026.2_RP11-382D8.5	3.66731	-1.34655	0.734124	-1.83423	0.0666205	0.430416
ENSG00000163512.9_AZI2	36.1558	2.69583	1.47117	1.83244	0.0668862	0.430422
ENSG00000169738.3_DCXR	83.1246	2.03113	1.10775	1.83357	0.0667183	0.430422
ENSG00000189064.8_GAGE2A	3.53033	-5.35707	2.92392	-1.83215	0.0669284	0.430422
ENSG00000133895.10_MEN1	2.94213	-4.6235	2.52321	-1.83239	0.066894	0.430422
ENSG00000085231.9_TAF9	88.0485	-1.68475	0.919591	-1.83206	0.0669419	0.430422
ENSG00000145741.11_BTF3	439.687	-0.765211	0.41754	-1.83266	0.0668525	0.430422
ENSG00000137710.10_RDX	11.5057	-2.26925	1.23774	-1.83337	0.0667471	0.430422
ENSG00000178149.12_DALRD3	18.0541	-2.65437	1.44862	-1.83234	0.0669008	0.430422
ENSG00000147224.6_PRPS1	5.69274	2.89484	1.57851	1.83391	0.0666678	0.430422
ENSG00000186222.3_BLOC1S4	30.1163	1.97213	1.07714	1.83089	0.0671167	0.430914
ENSG00000071051.9_NCK2	8.80284	-2.87135	1.56837	-1.83078	0.0671327	0.430914
ENSG00000163378.9_EOGT	2.60834	-1.82427	0.996278	-1.83108	0.0670885	0.430914
ENSG00000269621.1_RP11-98D18.15	6.62114	-1.45583	0.795276	-1.8306	0.0671609	0.430914
ENSG00000237440.4_ZNF737	5.46284	1.53805	0.840706	1.82948	0.0673283	0.431158
ENSG00000107485.11_GATA3	142.246	1.43004	0.781652	1.82951	0.067323	0.431158
ENSG00000257698.1_RP11-620J15.3	6.17469	4.06698	2.22314	1.82939	0.0673417	0.431158
ENSG00000169249.8_ZRSR2	70.9759	0.9203	0.502957	1.82978	0.067283	0.431158
ENSG00000236756.4_DNAJC9-AS1	2.92482	1.29306	0.707787	1.8269	0.067715	0.432403
ENSG00000101856.8_PGRMC1	11.7653	-2.09601	1.14711	-1.82721	0.0676679	0.432403
ENSG00000158220.9_ESYT3	7.00786	-1.05338	0.576417	-1.82746	0.0676305	0.432403
ENSG00000157184.5_CPT2	4.92498	-1.36538	0.747109	-1.82756	0.0676161	0.432403
ENSG00000203400.3_AP001187.1	24.3544	-0.867086	0.4746	-1.82698	0.0677025	0.432403
ENSG00000151414.10_NEK7	15.1275	-2.25413	1.23434	-1.82618	0.0678236	0.432589
ENSG00000080603.12_SRCAP	14.4427	1.37754	0.754602	1.82552	0.067923	0.432589
ENSG00000130338.8_TULP4	31.2782	-2.04554	1.12037	-1.82577	0.0678853	0.432589
ENSG00000125821.7_DTD1	9.75271	-1.79911	0.985477	-1.82562	0.0679069	0.432589
ENSG00000095066.7_HOOK2	20.0081	-0.915	0.501221	-1.82554	0.0679191	0.432589
ENSG00000148671.9_ADIRF	6.96467	-4.16683	2.28457	-1.8239	0.068167	0.433686
ENSG00000197756.5_RPL37A	321.206	-0.574662	0.315039	-1.8241	0.0681374	0.433686
ENSG00000109332.15_UBE2D3	502.201	0.571403	0.313335	1.82362	0.06821	0.433731
ENSG00000239367.2_RN7SL477P	3.79741	1.56011	0.857061	1.8203	0.0687128	0.433881
ENSG00000243678.7_NME1-NME2	208.94	-1.67121	0.917246	-1.82199	0.0684569	0.433881
ENSG00000149131.11_SERPING1	118.642	-2.51651	1.38364	-1.81876	0.0689477	0.433881
ENSG00000164761.4_TNFRSF11B	2.8633	-1.96659	1.08225	-1.81713	0.0691966	0.433881
ENSG00000145194.13_ECE2	3.41838	-5.31725	2.92399	-1.81849	0.0689893	0.433881
ENSG00000162222.9_TTC9C	16.1681	-1.40244	0.771552	-1.81769	0.0691119	0.433881
ENSG00000164574.11_GALNT10	6.80501	1.35471	0.744251	1.82023	0.0687236	0.433881
ENSG00000267199.1_RP11-861E21.2	5.22917	0.971142	0.533705	1.81962	0.0688161	0.433881
ENSG00000127463.9_EMC1	41.1577	-0.968247	0.532849	-1.81711	0.0691997	0.433881
ENSG00000164961.11_KIAA0196	14.409	2.62986	1.44567	1.81913	0.0688924	0.433881
ENSG00000111801.11_BTN3A3	12.8091	-3.01815	1.65723	-1.82121	0.0685753	0.433881
ENSG00000055211.8_GINM1	36.2382	-1.35042	0.742532	-1.81867	0.0689616	0.433881
ENSG00000198887.7_SMC5	127.007	1.24147	0.683214	1.81709	0.0692027	0.433881
ENSG00000254690.1_GS1-393G12.12	17.9601	1.5412	0.8479	1.81767	0.0691148	0.433881
ENSG00000153048.6_CARHSP1	36.8385	-1.11321	0.611763	-1.81968	0.0688082	0.433881
ENSG00000137720.3_C11orf1	25.2182	-0.905887	0.498224	-1.81823	0.0690286	0.433881
ENSG00000174799.6_CEP135	15.498	0.985524	0.541742	1.81917	0.0688849	0.433881
ENSG00000167914.6_GSDMA	11.3634	1.15642	0.635932	1.81847	0.0689921	0.433881
ENSG00000166562.4_SEC11C	112.256	-1.37487	0.756038	-1.81852	0.0689851	0.433881
ENSG00000141458.8_NPC1	29.5984	-1.04901	0.575832	-1.82174	0.0684948	0.433881
ENSG00000184990.8_SIVA1	150.856	1.01782	0.558265	1.82318	0.0682762	0.433881
ENSG00000229983.1_RP11-15I11.2	3.60608	-1.4683	0.807966	-1.81728	0.0691749	0.433881
ENSG00000168228.10_ZCCHC4	11.3989	-1.07347	0.590172	-1.81891	0.0689251	0.433881
ENSG00000223478.1_RP11-545E17.3	3.25718	5.32266	2.92356	1.82061	0.0686665	0.433881
ENSG00000106554.7_CHCHD3	32.7141	-2.44001	1.33928	-1.82189	0.0684722	0.433881
ENSG00000269175.1_AC093157.1	7.80899	1.0108	0.555472	1.81972	0.0688023	0.433881
ENSG00000235200.1_RP4-763G1.2	5.06994	-0.991151	0.54544	-1.81716	0.0691928	0.433881
ENSG00000233276.2_GPX1	116.005	-1.69231	0.931532	-1.8167	0.0692634	0.434036
ENSG00000203281.1_AL590489.1	7.35406	-1.17111	0.644994	-1.81569	0.0694175	0.434777
ENSG00000267106.1_C19orf82	85.4089	-1.15899	0.638482	-1.81522	0.0694902	0.435007
ENSG00000152104.7_PTPN14	17.1923	1.21604	0.670065	1.81482	0.069552	0.43513
ENSG00000242485.1_MRPL20	139.881	-1.39179	0.766986	-1.81462	0.0695819	0.43513
ENSG00000100285.9_NEFH	2.92911	-5.09382	2.80752	-1.81434	0.0696246	0.435172
ENSG00000168967.10_PMCHL1	2.58588	-1.74172	0.960332	-1.81366	0.06973	0.43538
ENSG00000197128.7_ZNF772	7.11092	-1.16082	0.639998	-1.81379	0.0697107	0.43538
ENSG00000181467.2_RAP2B	1076.97	-1.04125	0.574219	-1.81334	0.0697796	0.435465
ENSG00000100150.12_DEPDC5	4.64024	1.53447	0.846876	1.81192	0.0699984	0.436255
ENSG00000214026.6_MRPL23	94.6425	2.36884	1.30716	1.8122	0.0699557	0.436255
ENSG00000171262.7_FAM98B	17.5019	1.59654	0.881293	1.81158	0.0700505	0.436255
ENSG00000204257.10_HLA-DMA	106.586	1.35783	0.749453	1.81176	0.070024	0.436255
ENSG00000130305.12_NSUN5	13.361	-2.5373	1.40134	-1.81063	0.0701984	0.436277
ENSG00000126254.7_RBM42	20.6998	2.15304	1.18899	1.81081	0.0701706	0.436277
ENSG00000145868.12_FBXO38	15.1813	1.4123	0.779927	1.81081	0.0701704	0.436277
ENSG00000214783.5_POLR2J4	4.77682	-1.7609	0.972496	-1.81071	0.0701864	0.436277
ENSG00000055732.8_MCOLN3	2.97448	-1.63926	0.905499	-1.81033	0.0702441	0.436336
ENSG00000144061.8_NPHP1	11.3194	-1.28352	0.709596	-1.80881	0.0704806	0.437131
ENSG00000119979.11_FAM45A	36.957	1.14808	0.634598	1.80915	0.0704275	0.437131
ENSG00000178573.6_MAF	76.6854	1.39767	0.772684	1.80885	0.0704736	0.437131
ENSG00000165669.9_FAM204A	87.2016	-1.56205	0.863733	-1.80848	0.0705311	0.437221
ENSG00000154473.13_BUB3	222.658	1.17092	0.647646	1.80796	0.0706121	0.437498
ENSG00000117222.9_RBBP5	127.222	1.0692	0.591711	1.80696	0.0707689	0.437797
ENSG00000113273.11_ARSB	29.354	1.93789	1.07245	1.80697	0.0707664	0.437797
ENSG00000100462.11_PRMT5	24.8368	-2.68847	1.48774	-1.80708	0.0707499	0.437797
ENSG00000091127.9_PUS7	2.61131	-1.54988	0.858057	-1.80627	0.0708764	0.437871
ENSG00000160714.5_UBE2Q1	29.4909	-2.25438	1.24847	-1.80571	0.0709635	0.437871
ENSG00000204371.7_EHMT2	62.235	0.879598	0.48718	1.80549	0.0709983	0.437871
ENSG00000273247.1_RP11-83A24.2	17.7017	-1.05309	0.583197	-1.80573	0.0709613	0.437871
ENSG00000263585.1_RP11-498C9.13	2.81859	-5.03785	2.79021	-1.80555	0.0709891	0.437871
ENSG00000132561.9_MATN2	3.90481	-1.4694	0.813784	-1.80564	0.0709746	0.437871
ENSG00000198771.6_RCSD1	39.7715	0.99034	0.548968	1.804	0.0712307	0.4383
ENSG00000169919.12_GUSB	28.6998	1.16982	0.648847	1.80293	0.0713996	0.4383
ENSG00000165392.5_WRN	11.0244	-2.39474	1.32703	-1.80459	0.071139	0.4383
ENSG00000177192.9_PUS1	12.4616	-0.987595	0.548003	-1.80217	0.0715183	0.4383
ENSG00000239334.1_GSTTP2	4.28128	-1.02328	0.567855	-1.80201	0.0715446	0.4383
ENSG00000113282.9_CLINT1	69.8021	-1.20188	0.666977	-1.80199	0.0715477	0.4383
ENSG00000128641.13_MYO1B	3.94988	-1.42935	0.792898	-1.80269	0.0714371	0.4383
ENSG00000213240.7_NOTCH2NL	25.8714	-2.20079	1.22079	-1.80276	0.0714263	0.4383
ENSG00000146909.3_NOM1	26.39	1.04892	0.582354	1.80117	0.0716756	0.4383
ENSG00000105963.9_ADAP1	70.6022	-2.62575	1.45784	-1.80112	0.0716833	0.4383
ENSG00000131779.6_PEX11B	3.95502	-3.63994	2.01846	-1.80333	0.0713368	0.4383
ENSG00000137970.7_RP11-122C9.1	15.4934	-1.45311	0.805507	-1.80397	0.0712359	0.4383
ENSG00000198730.3_CTR9	99.2354	-1.52024	0.843355	-1.80261	0.0714501	0.4383
ENSG00000132297.7_HHLA1	5.22667	-1.74312	0.967705	-1.80129	0.0716572	0.4383
ENSG00000135317.8_SNX14	7.48234	1.66103	0.92064	1.80422	0.0711975	0.4383
ENSG00000130940.10_CASZ1	6.92598	1.75609	0.974999	1.80112	0.0716843	0.4383
ENSG00000197702.7_PARVA	15.0092	-1.07248	0.594768	-1.80319	0.0713592	0.4383
ENSG00000204104.7_TRAF3IP1	6.45116	-1.31866	0.733134	-1.79867	0.0720714	0.439168
ENSG00000167014.6_C15orf43	7.55484	-1.1183	0.621773	-1.79857	0.0720873	0.439168
ENSG00000050393.7_MCUR1	43.7415	0.931649	0.517806	1.79923	0.0719831	0.439168
ENSG00000108591.5_DRG2	5.47673	-2.64533	1.47059	-1.79883	0.072046	0.439168
ENSG00000171033.8_PKIA	3.12122	5.259	2.9237	1.79875	0.0720582	0.439168
ENSG00000169021.4_UQCRFS1	268.145	-1.05948	0.58913	-1.79838	0.0721168	0.439168
ENSG00000122224.13_LY9	14.4679	1.12712	0.626443	1.79923	0.0719823	0.439168
ENSG00000034063.9_UHRF1	7.29826	1.53505	0.853335	1.79888	0.0720372	0.439168
ENSG00000149257.9_SERPINH1	6.6106	-2.58659	1.4394	-1.79699	0.0723379	0.440293
ENSG00000172071.7_EIF2AK3	17.9381	-2.42834	1.35213	-1.79594	0.0725036	0.441079
ENSG00000090920.9_FCGBP	2.46111	-4.40418	2.45548	-1.79361	0.0728747	0.441558
ENSG00000121410.7_A1BG	68.9327	0.873954	0.487211	1.79379	0.0728469	0.441558
ENSG00000164031.12_DNAJB14	70.2238	-1.24675	0.694913	-1.79411	0.0727952	0.441558
ENSG00000215769.4_hsa-mir-6080	3.50256	-2.07497	1.15639	-1.79434	0.0727582	0.441558
ENSG00000189306.6_RRP7A	93.1657	1.08654	0.605711	1.79382	0.0728422	0.441558
ENSG00000270164.1_AC006129.4	2.9929	4.50485	2.51051	1.79439	0.0727502	0.441558
ENSG00000165406.11_MARCH8	5.26467	-1.79345	0.99958	-1.7942	0.0727812	0.441558
ENSG00000148343.14_FAM73B	5.0535	1.99985	1.11455	1.79431	0.0727643	0.441558
ENSG00000267077.1_RP11-127I20.5	2.59933	1.78267	0.994177	1.79311	0.0729546	0.441561
ENSG00000187581.2_COX8C	3.24939	-5.24277	2.92414	-1.79293	0.0729847	0.441561
ENSG00000154162.9_CDH12	14.9084	-1.08629	0.605779	-1.79321	0.0729397	0.441561
[truncated: 348 more rows]
